# Supplementary material for: Exploring novel aryl/heteroaryl-isosteres of phenylthiazole against multidrug-resistant bacteria
Source: Royal Society of Chemistry journal article supplement (doi:10.1039/d3ra02778c), 2023-01-01
Supplement: d3ra02778c1.pdf [file d3ra02778c1.pdf]

## Supporting information

### **Exploring novel aryl/heteroaryl-isosteres of phenylthiazole against Multidrug Resistant Bacteria**

Mariam Omara,<sup>a</sup> Mohamed Hagra, <sup>b\*</sup> Mohamed M. Elsebaie,<sup>b</sup> Nader S. Abutaleb,<sup>c,d</sup> Hanzada T. Nour El-Din,<sup>e</sup> Maria O. Mekhail,<sup>f</sup> Ahmed S. Attia,<sup>e,g</sup> Mohamed N. Seleem,<sup>e,h</sup> Marwa T. Sarg,<sup>a</sup> Abdelrahman S. Mayhoub.<sup>b,i</sup>

<sup>a</sup> Department of Pharmaceutical Organic Chemistry, College of Pharmacy,  
Al-Azhar University, Cairo, Egypt.

<sup>b</sup> Department of Pharmaceutical Organic Chemistry, College of Pharmacy,  
Al-Azhar University, Cairo 11884, Egypt.

<sup>c</sup> Department of Biomedical Sciences and Pathobiology, Virginia-Maryland  
College of Veterinary Medicine, Virginia Polytechnic Institute and State  
University, Blacksburg, Virginia 24061, United States of America.

<sup>d</sup> Department of Microbiology and Immunology, Faculty of Pharmacy, Zagazig  
University, Zagazig 44519, Egypt.

<sup>e</sup> Department of Microbiology and Immunology, Faculty of Pharmacy, Cairo  
University, Cairo 11562, Egypt.

<sup>f</sup> PharmD-Clinical Pharmacy Undergraduate Program, Faculty of Pharmacy,  
Cairo University, Cairo 11562, Egypt.

<sup>g</sup> Department of Microbiology and Immunology, School of Pharmacy,  
Newgiza University, Giza, Egypt.

<sup>h</sup> Center for One Health Research, Virginia Polytechnic Institute and State  
University,  
Blacksburg, Virginia 24061, United States of America.

<sup>i</sup> Nanoscience Program, University of Science and Technology, Zewail City of  
Science  
and Technology, Giza, Egypt.

#### **Corresponding Author.**

\* E-mail, [m.hagrs@azhar.edu.eg](mailto:m.hagrs@azhar.edu.eg)

**TABLE OF CONTENT:**

|                                                                       |        |
|-----------------------------------------------------------------------|--------|
| $^1\text{H}$ and $^{13}\text{C}$ spectra of the synthesized compounds | S3-S91 |
| HPLC chromatogram of compound 15d                                     | S92    |

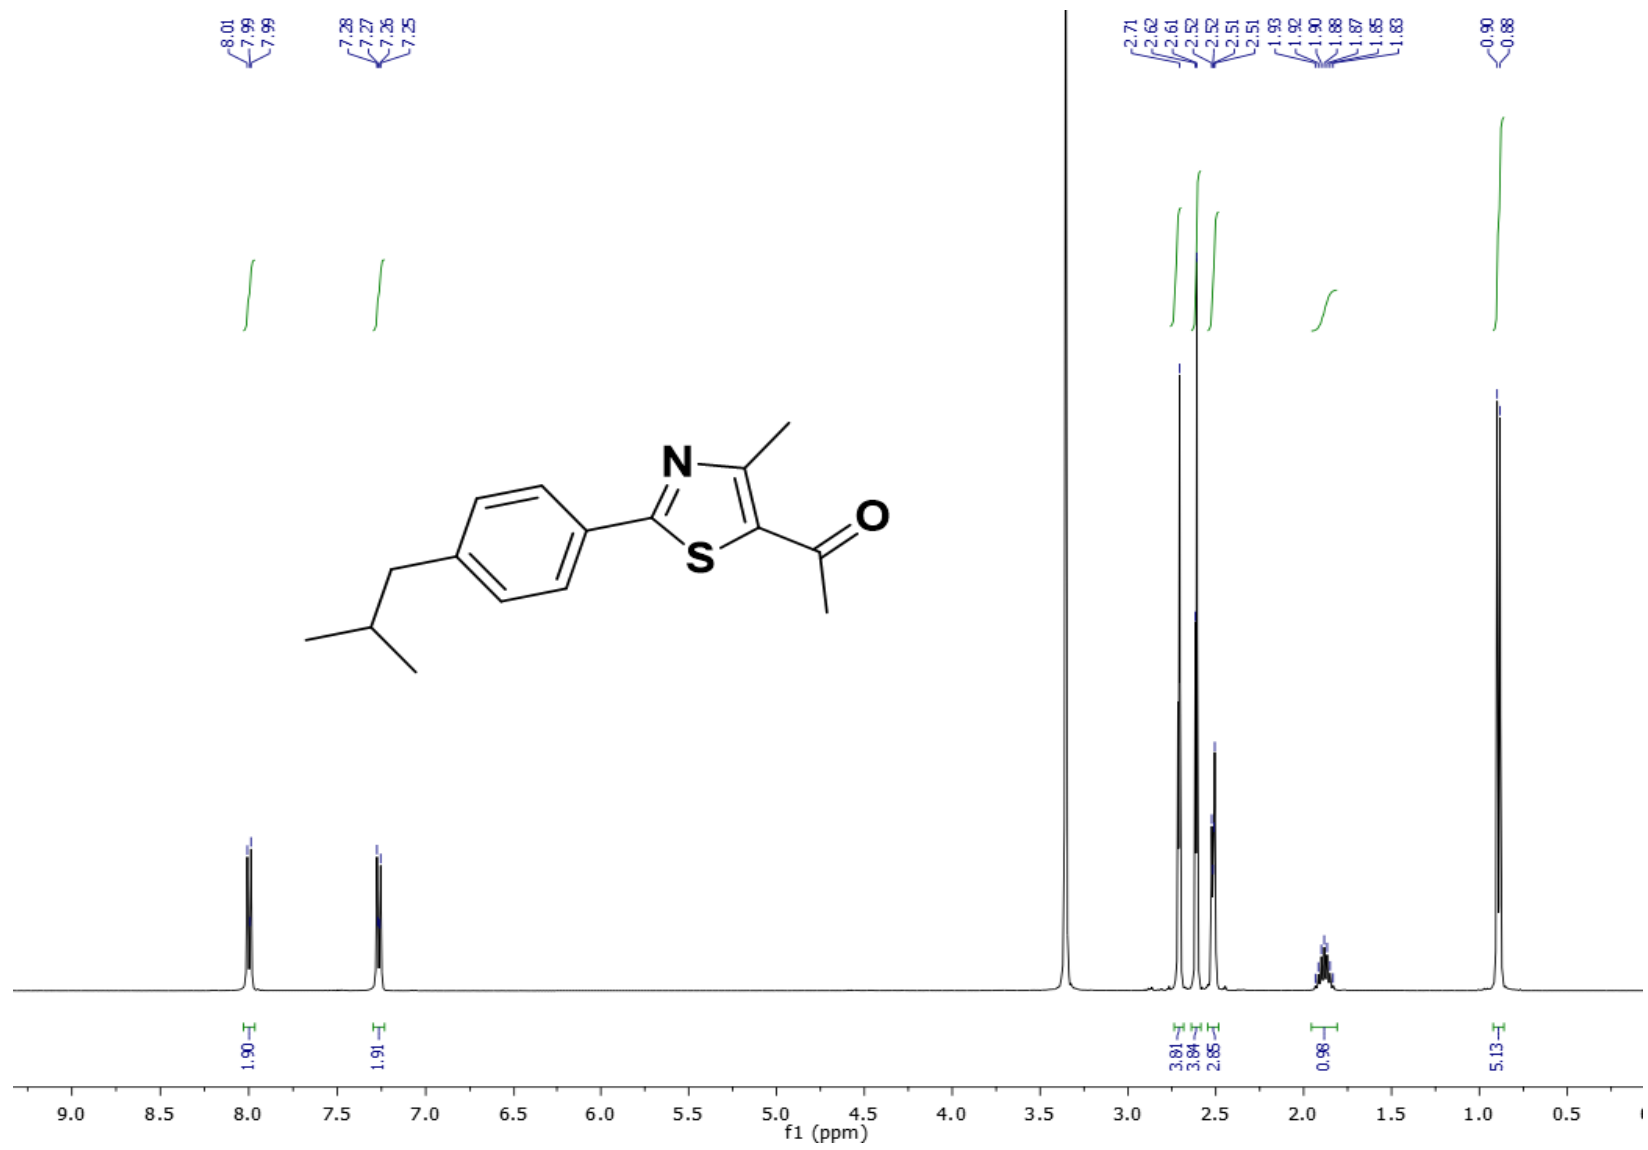

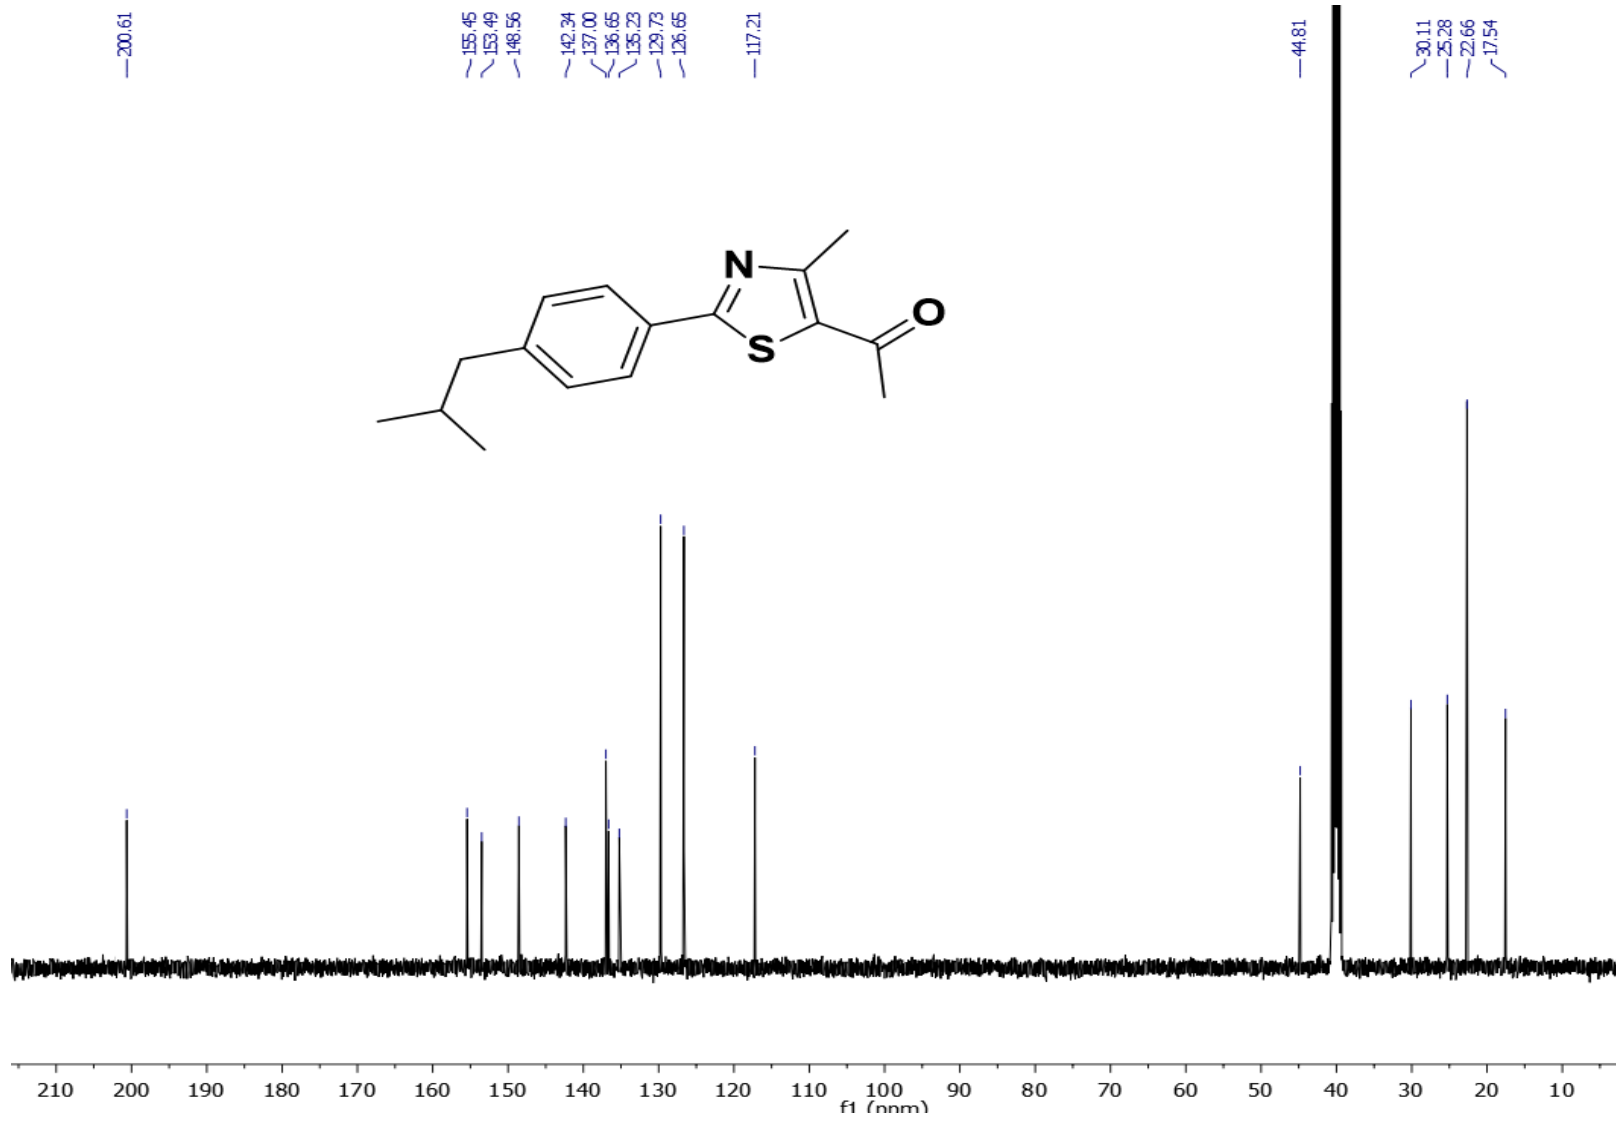

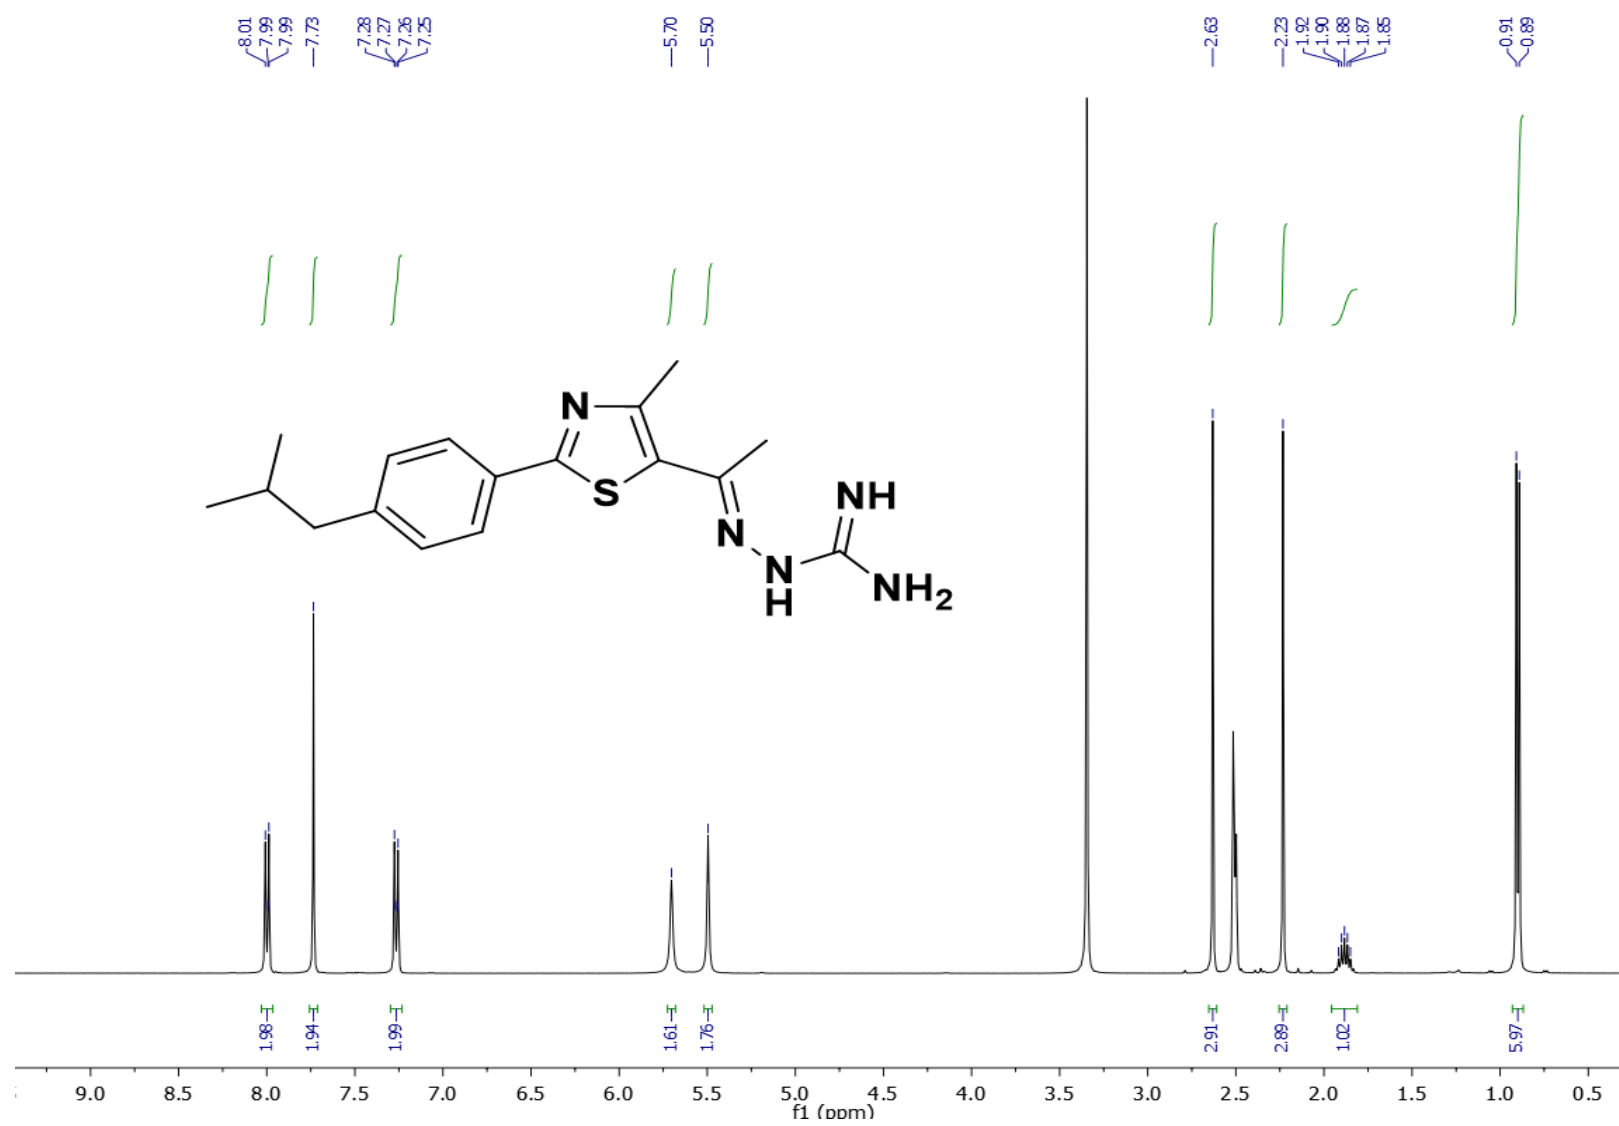

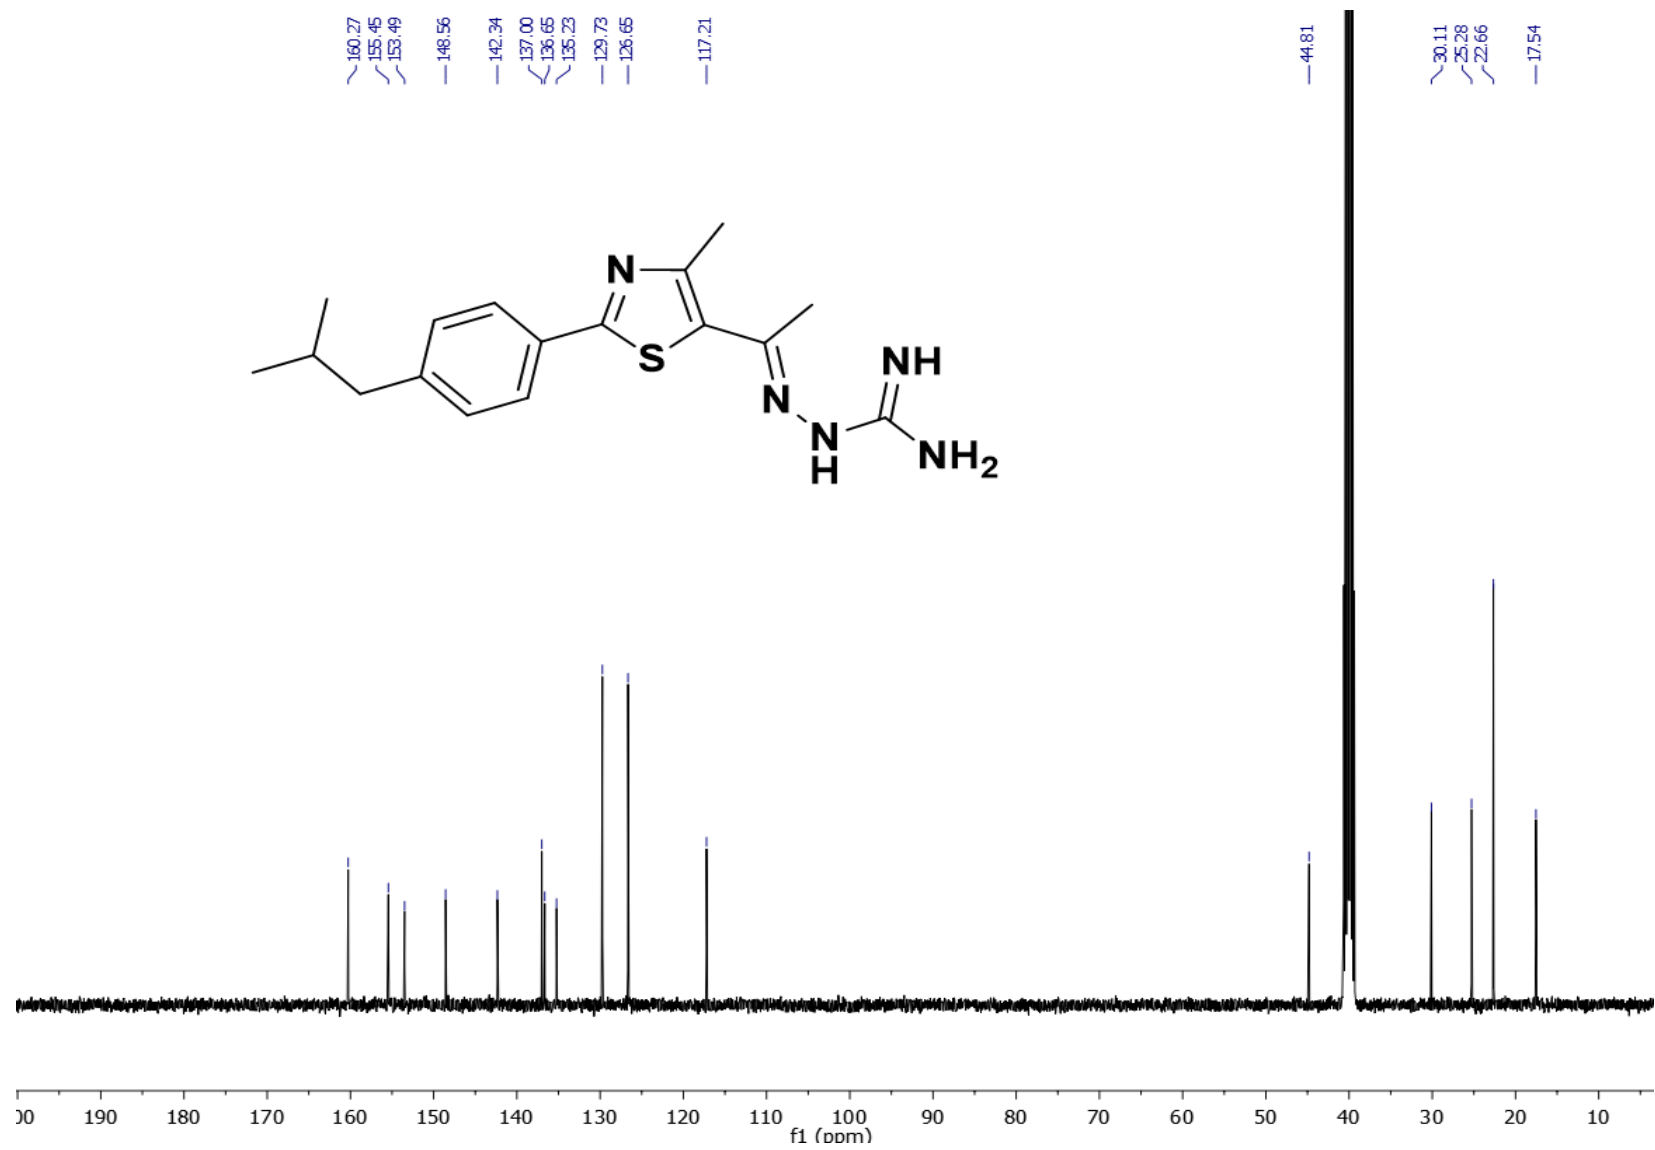

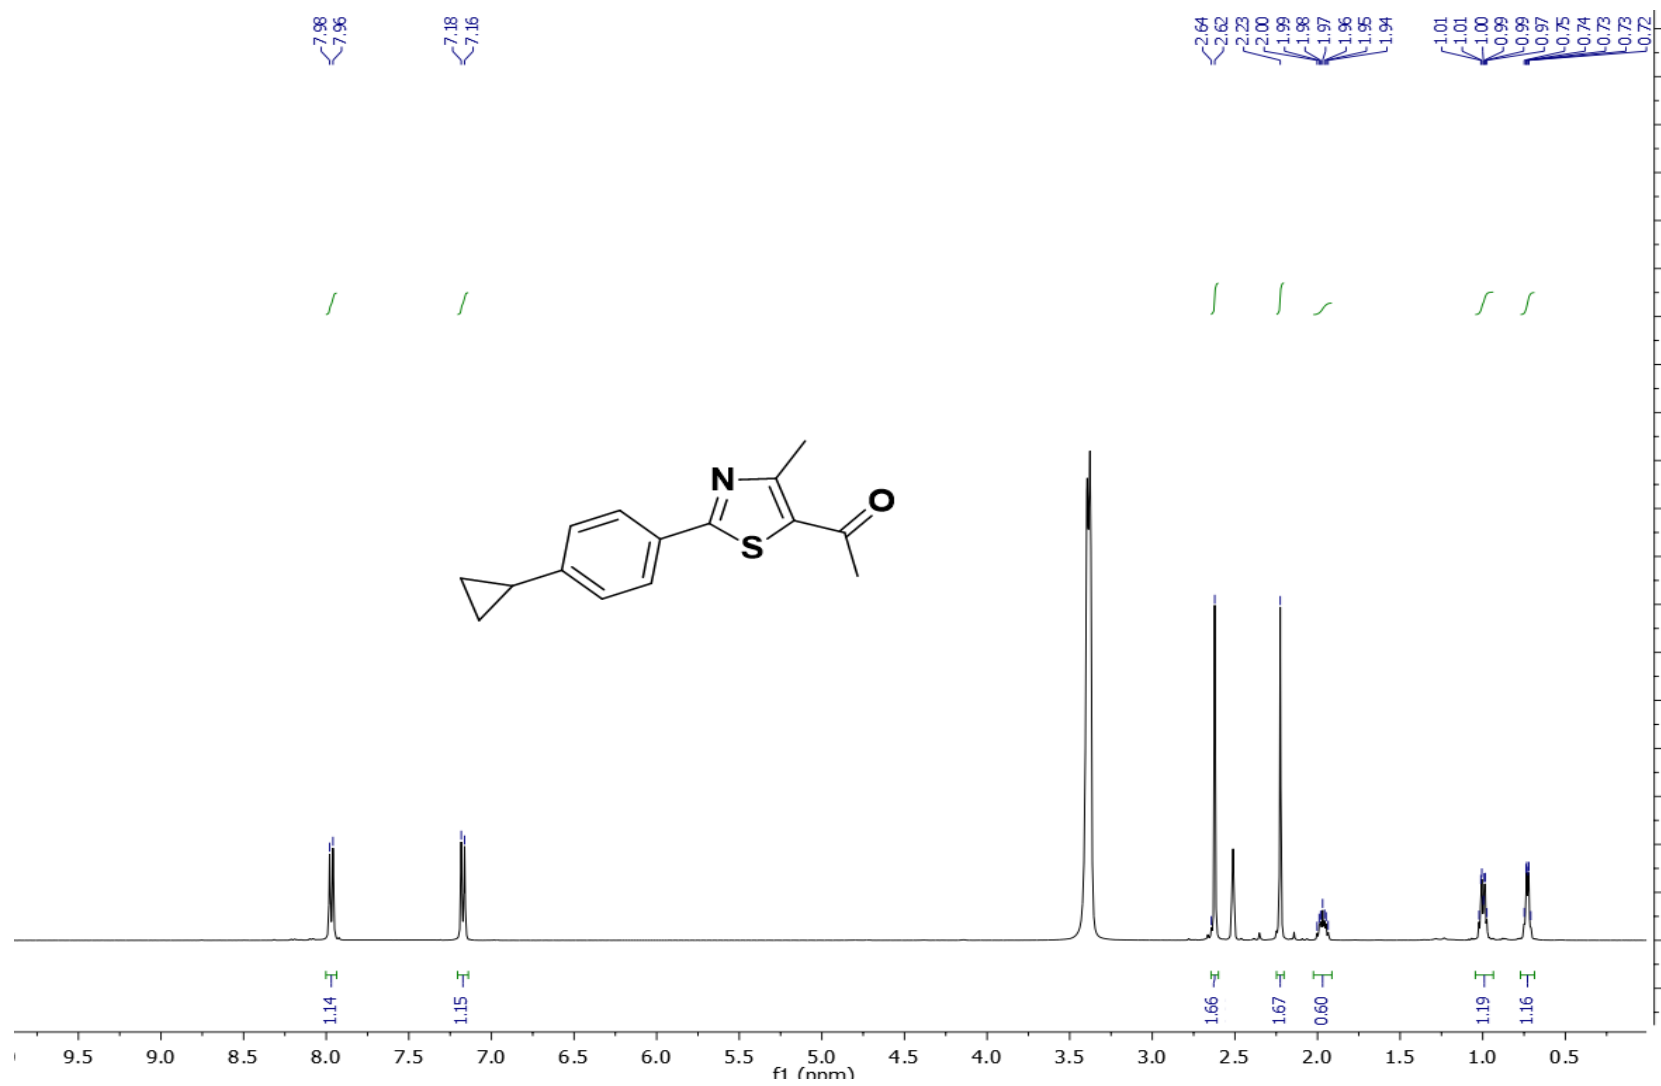

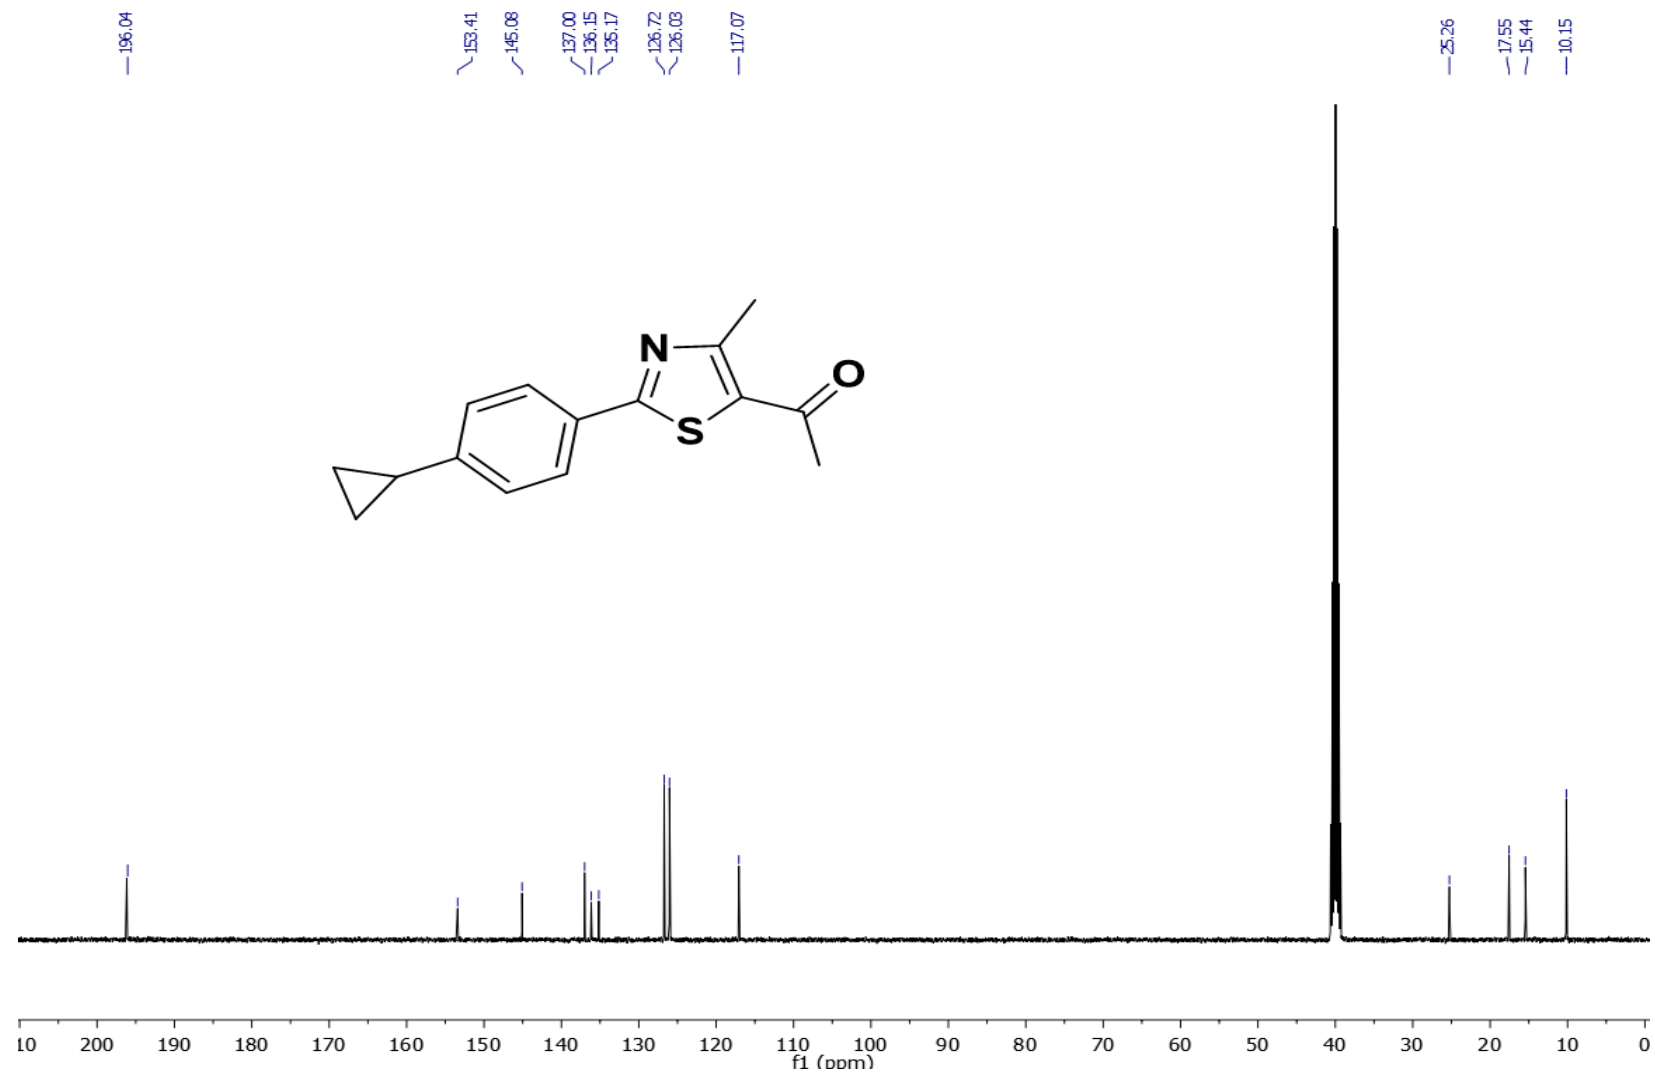



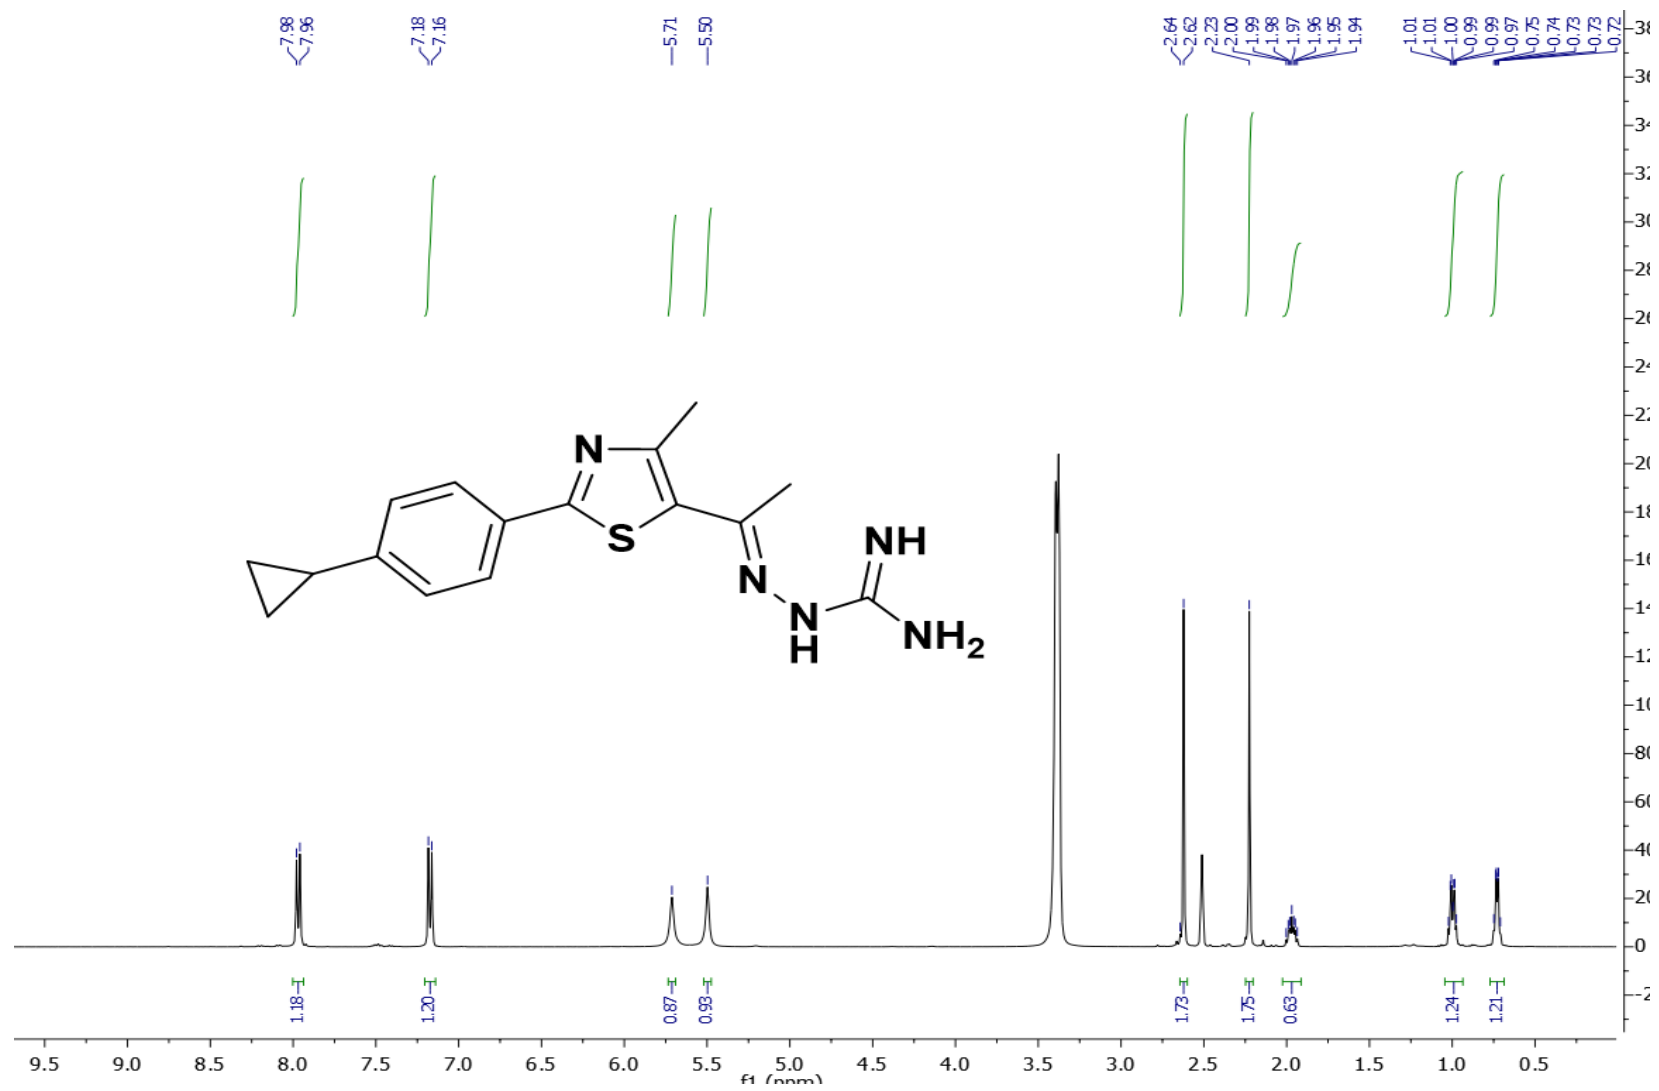

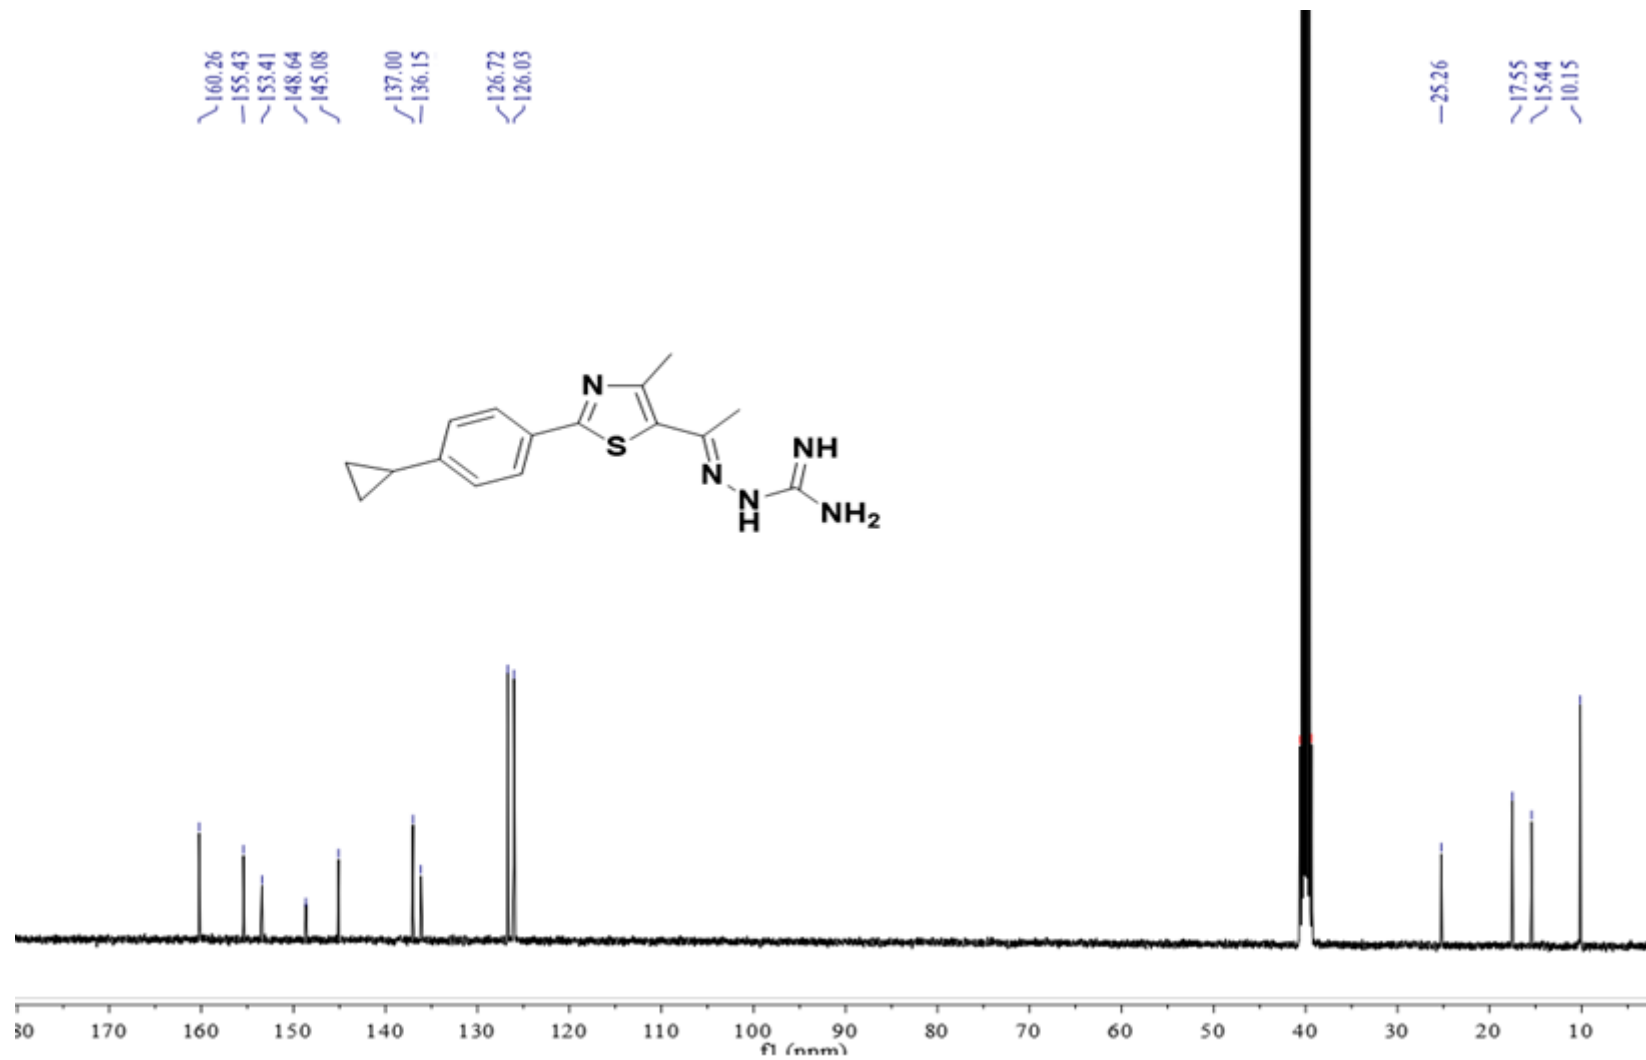

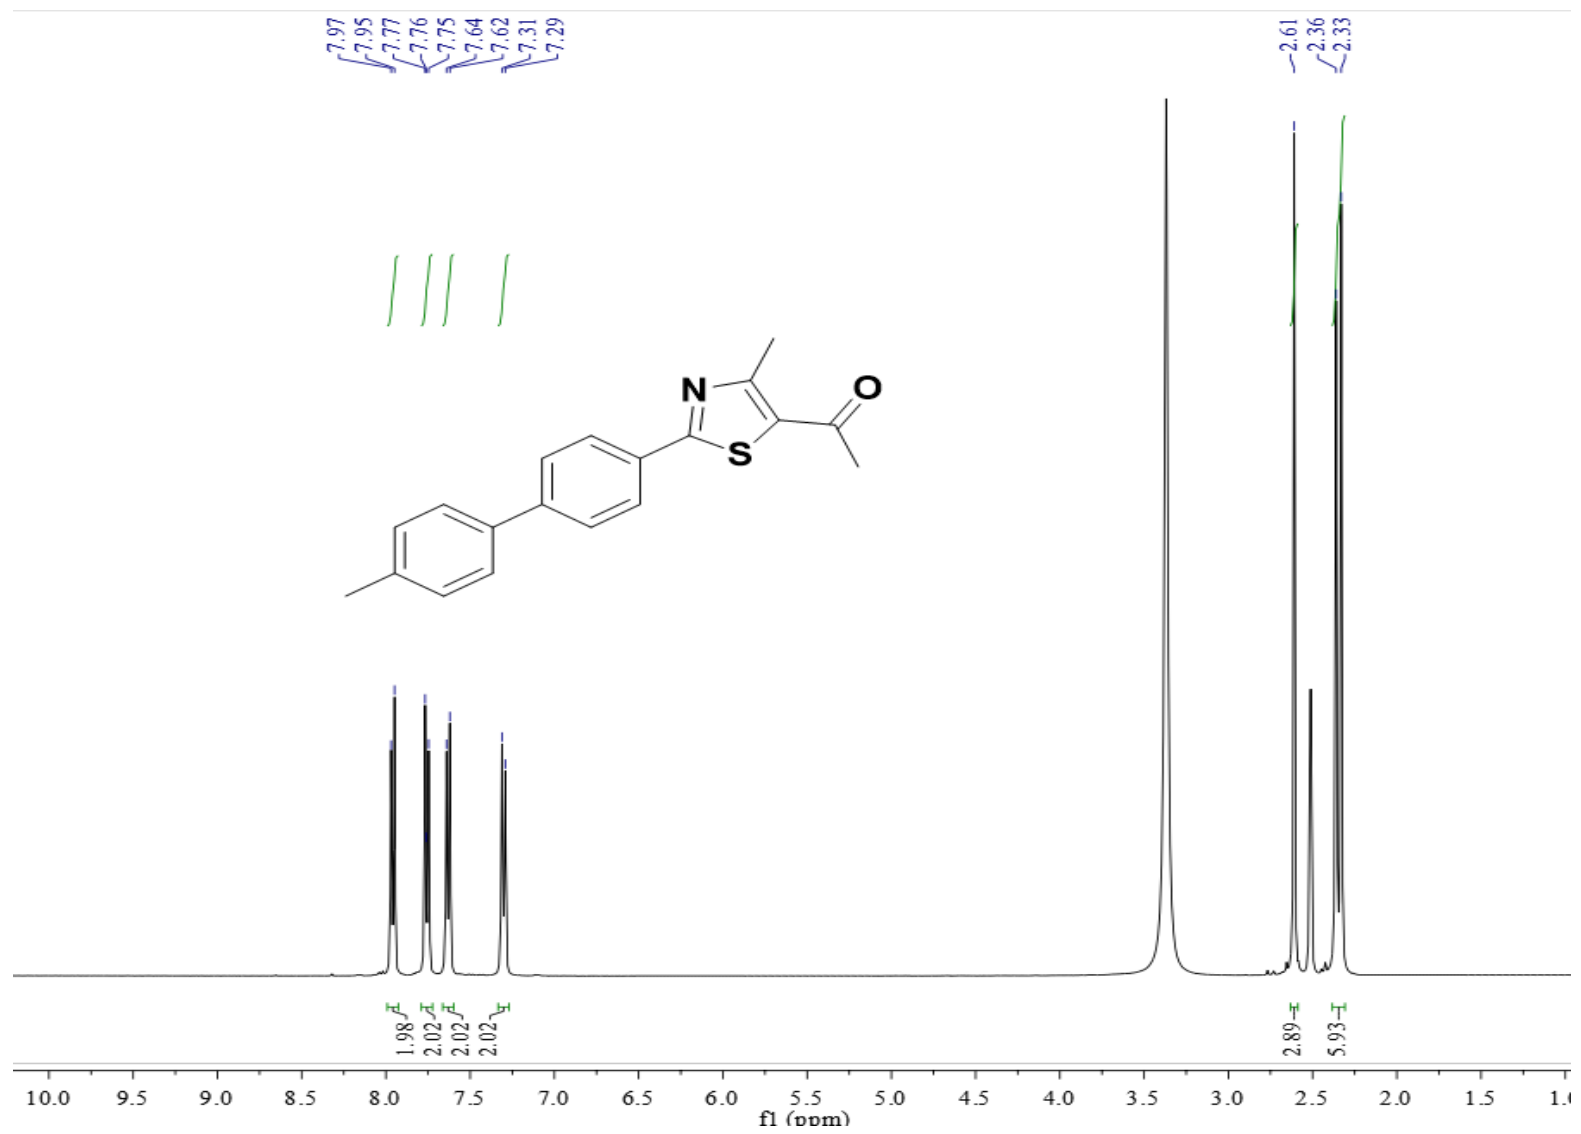

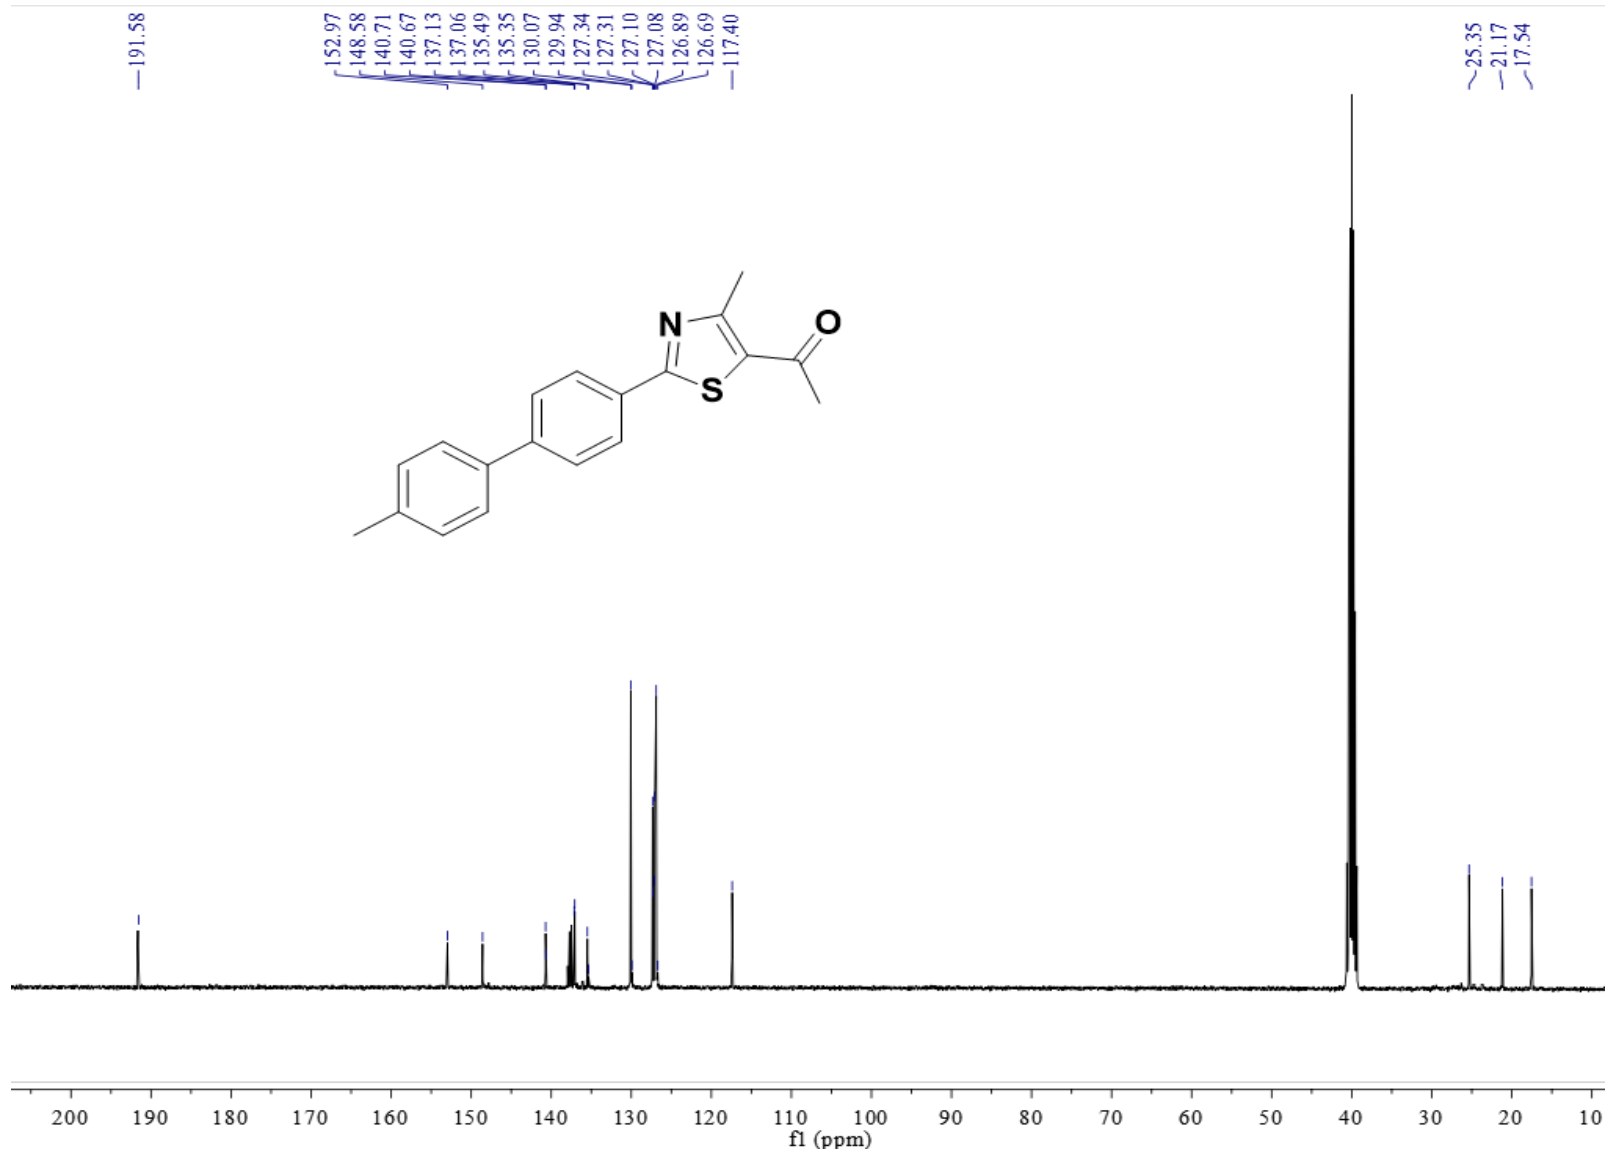

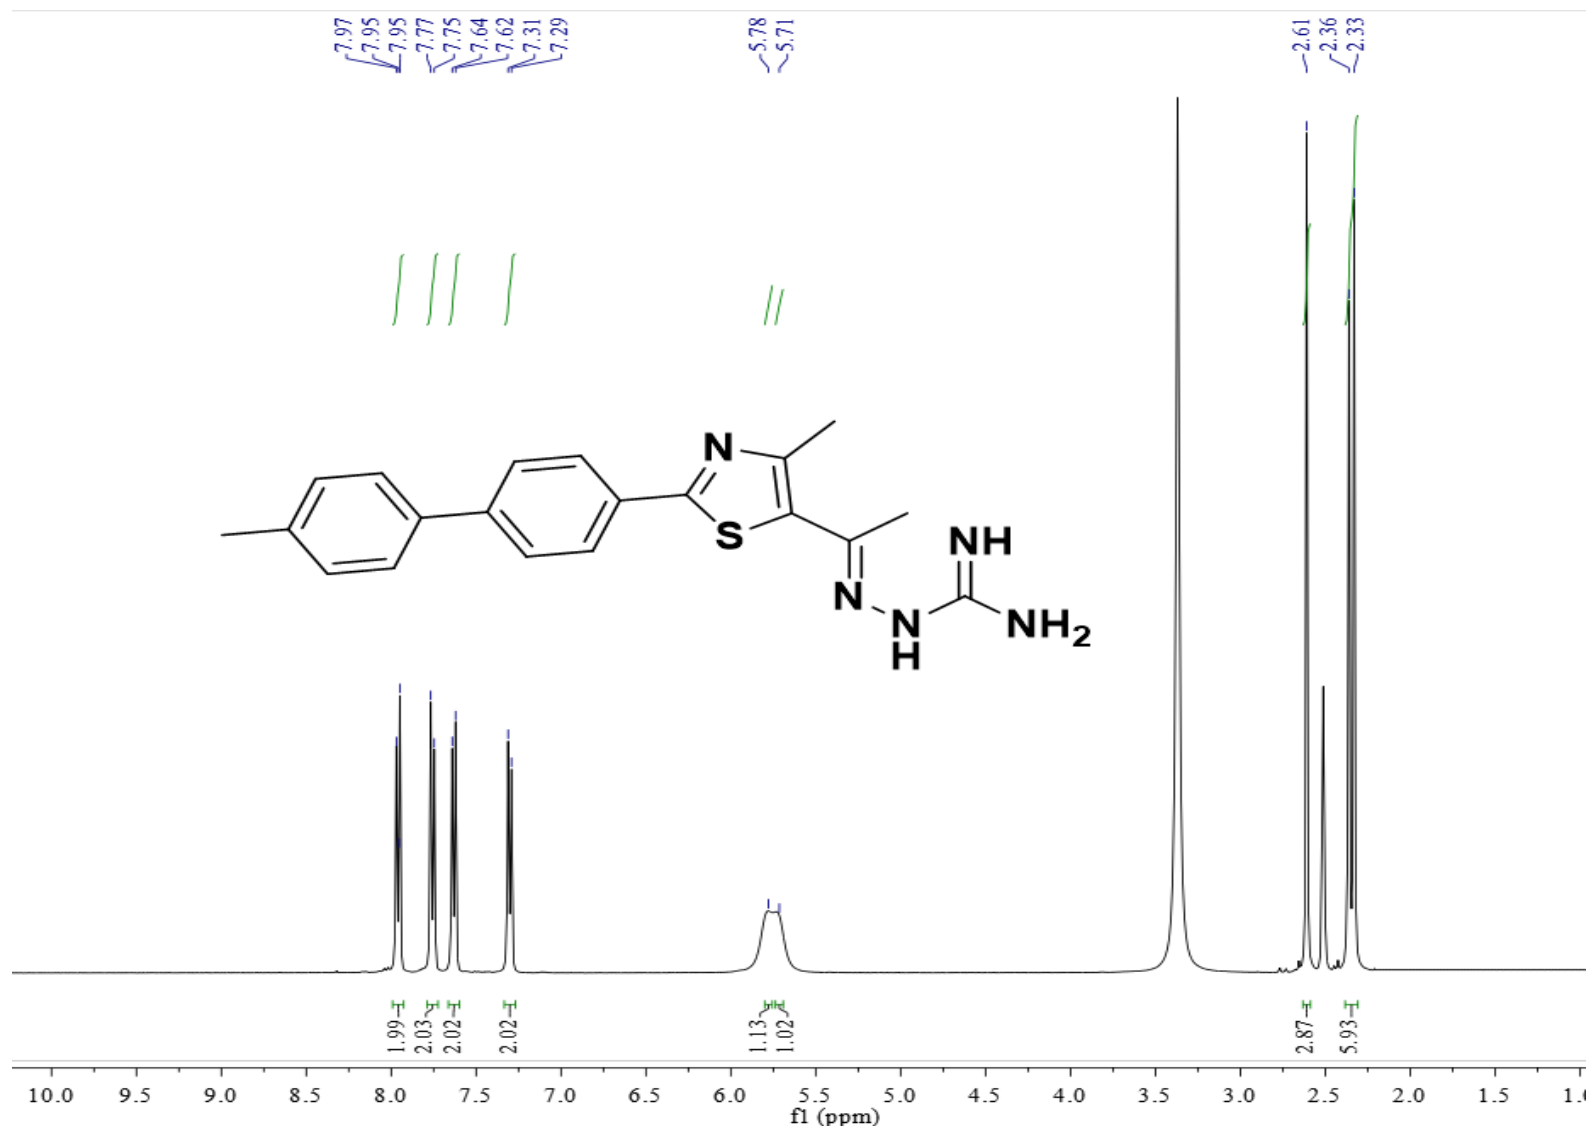

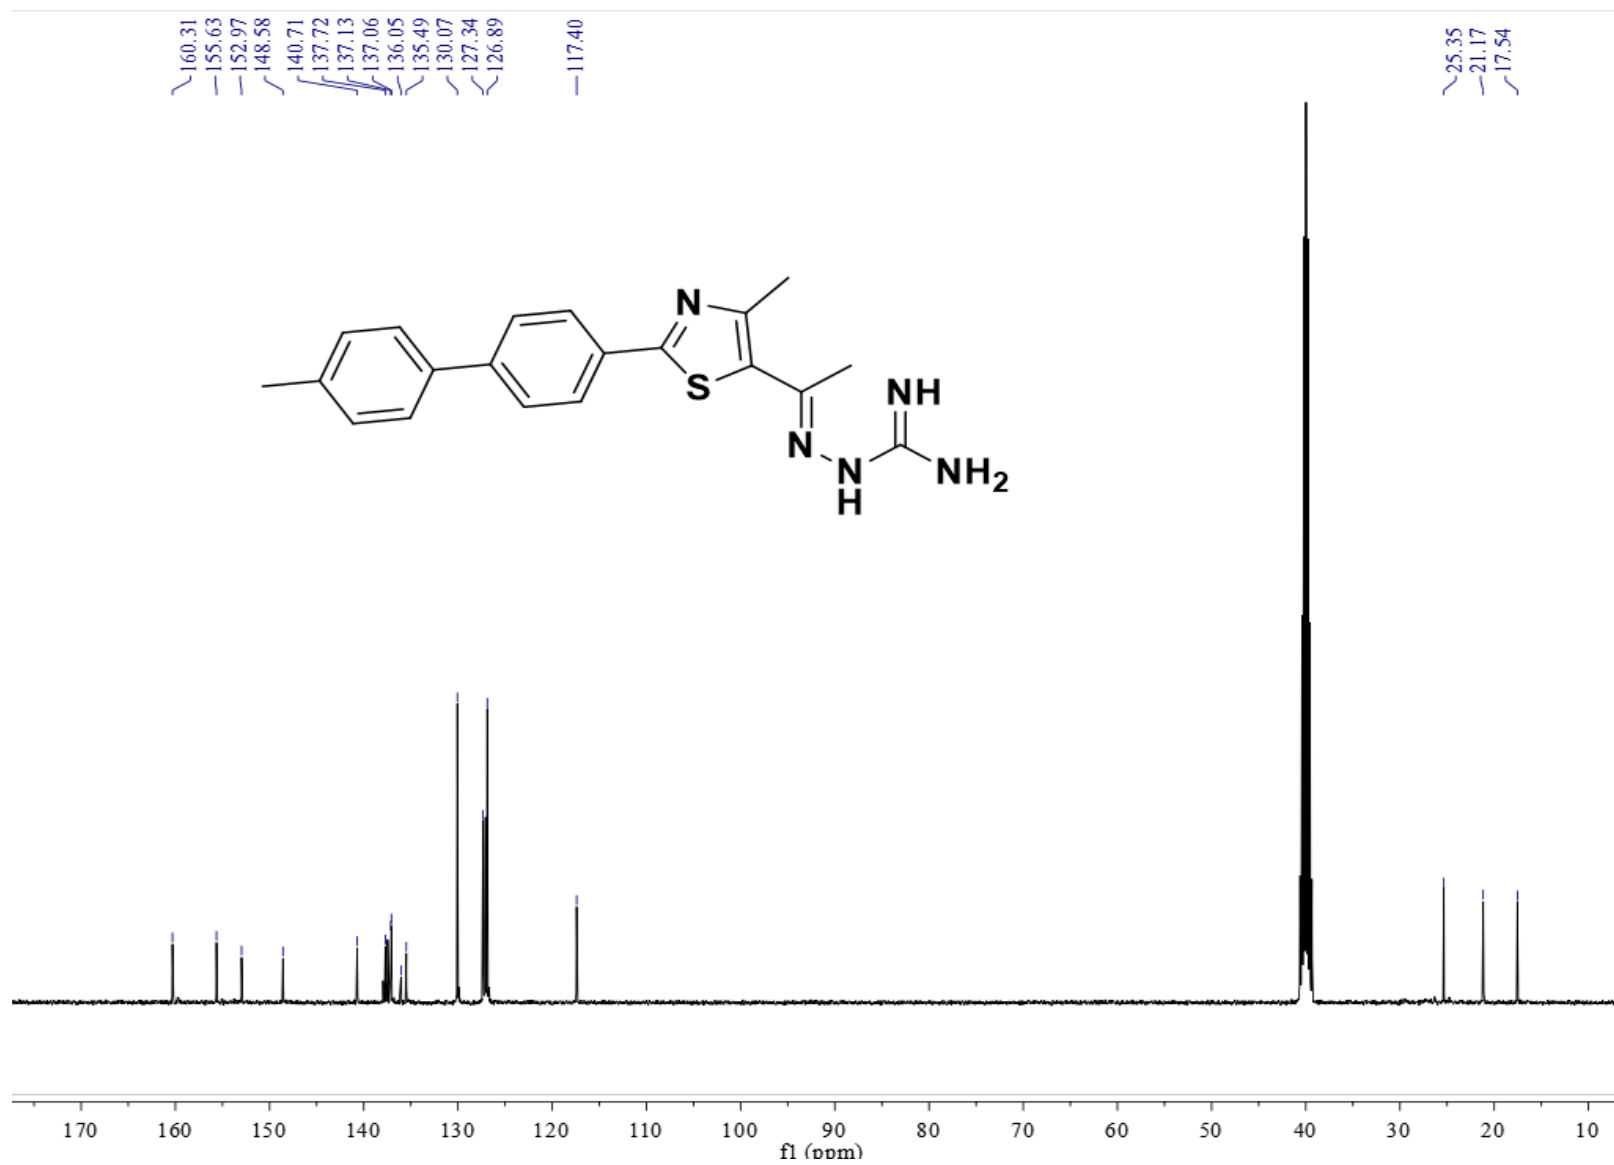

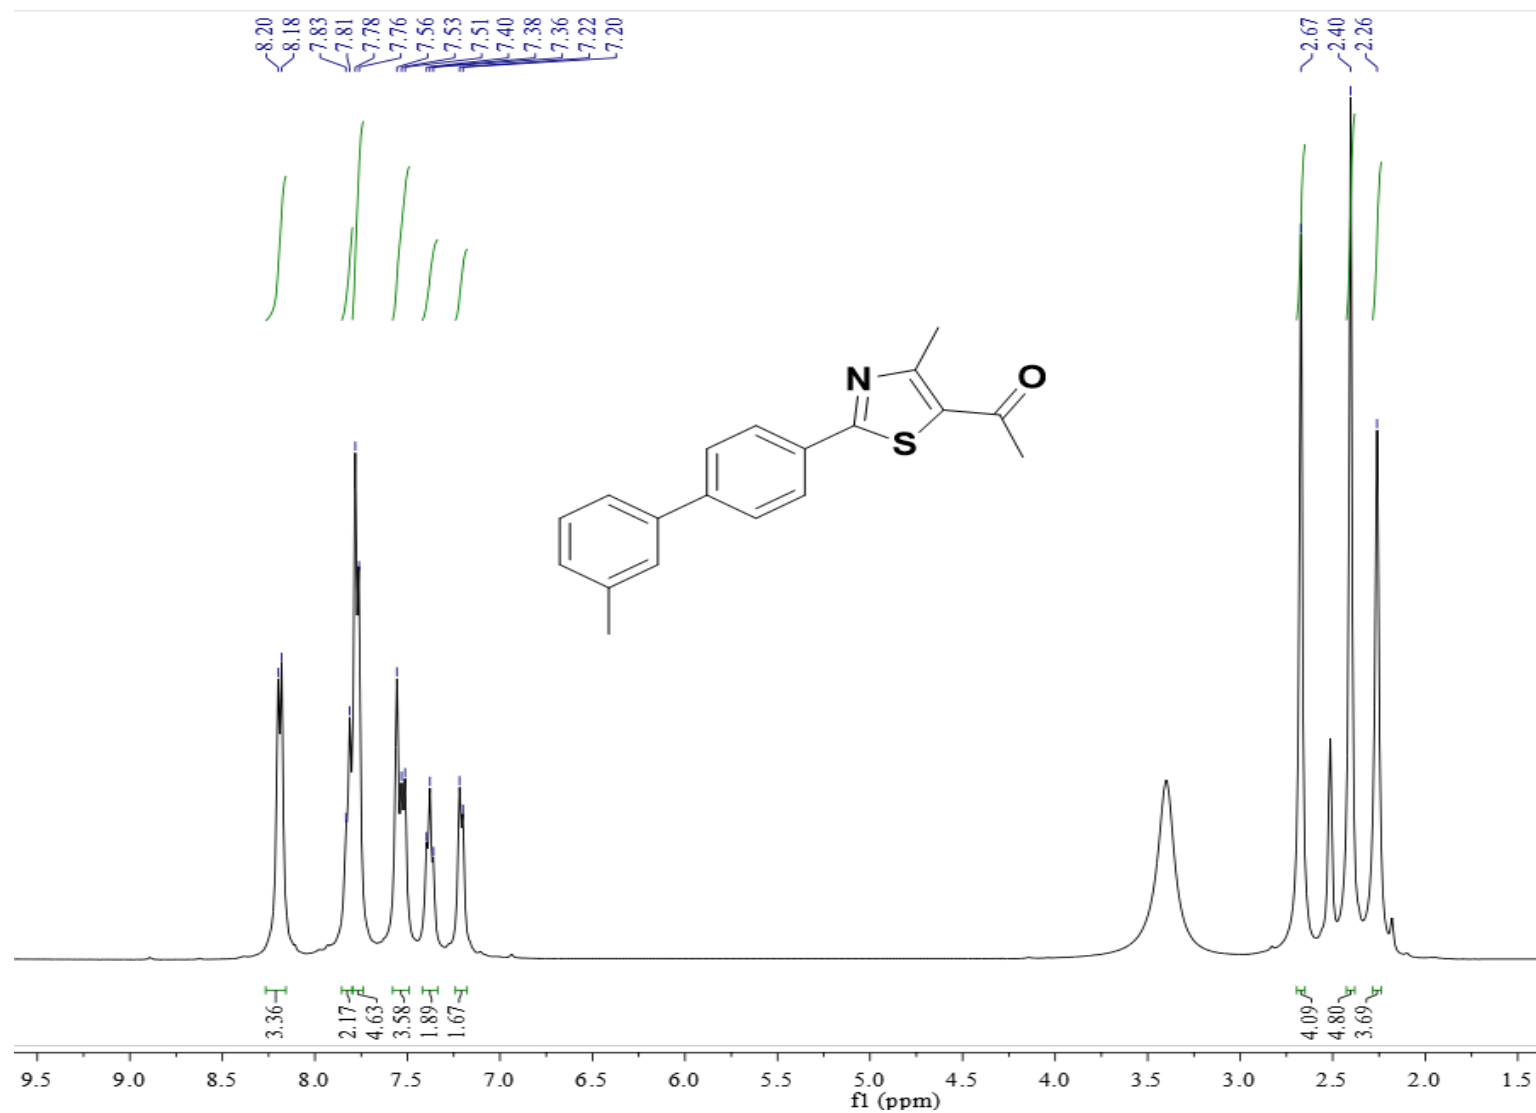

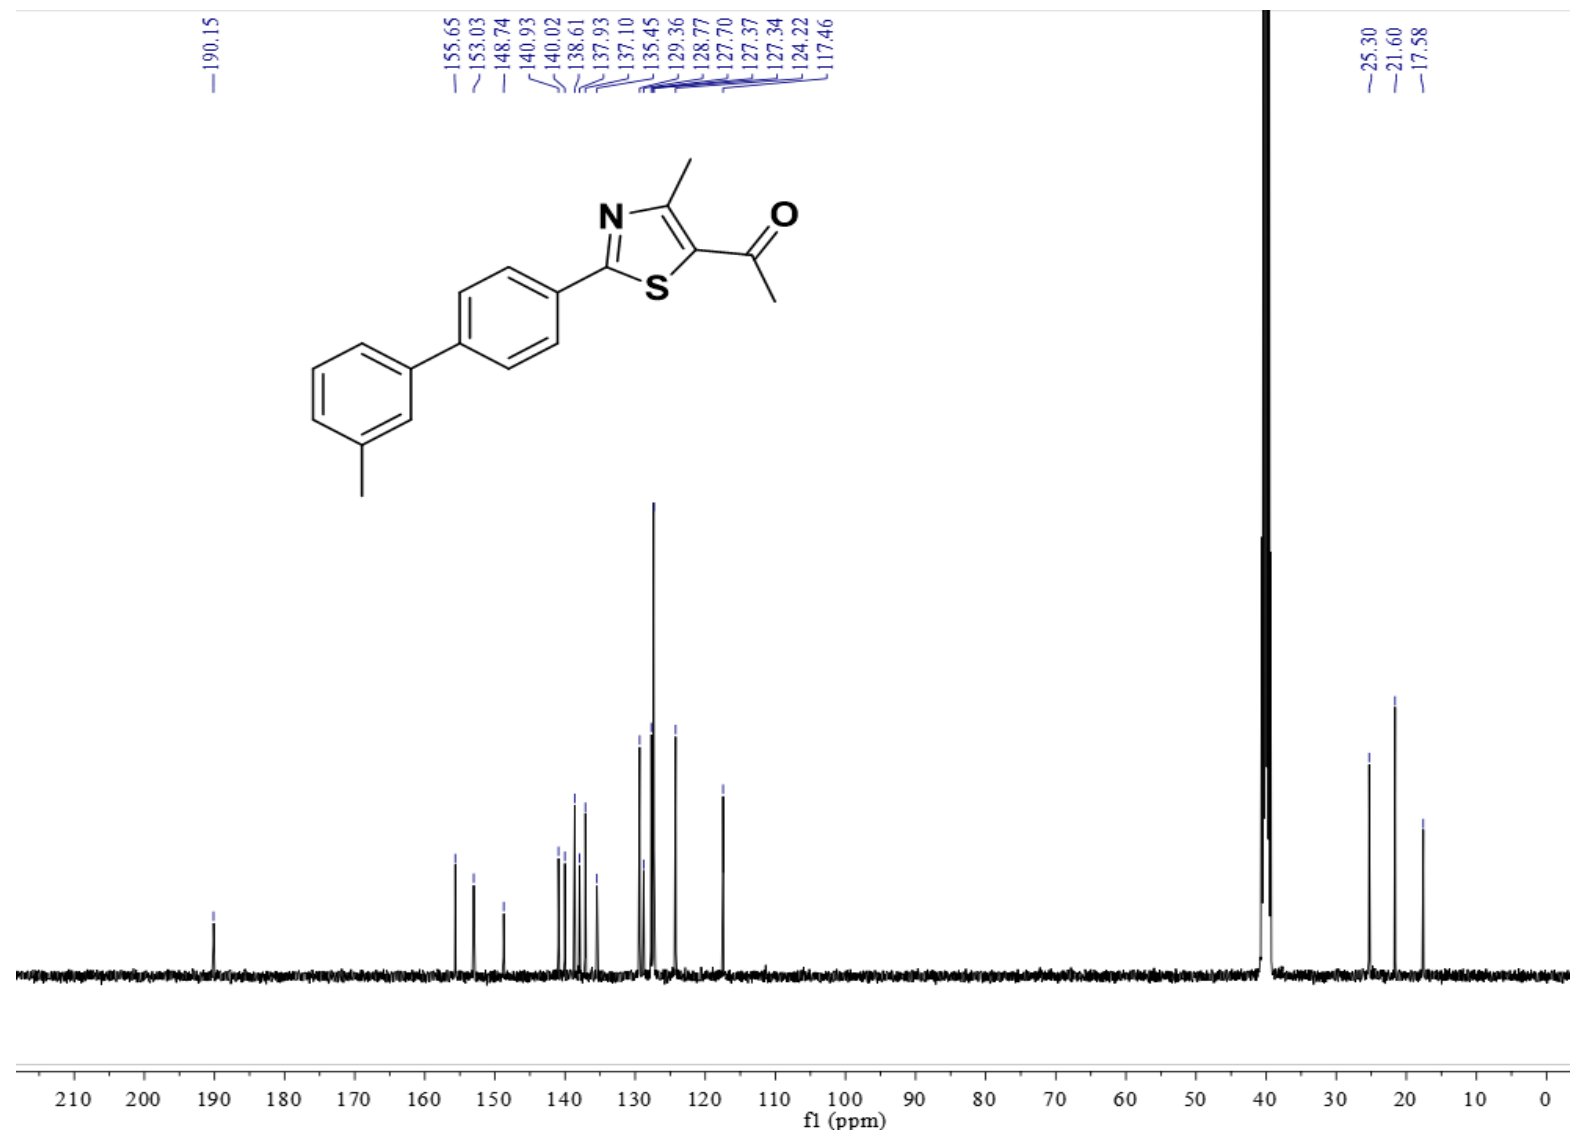



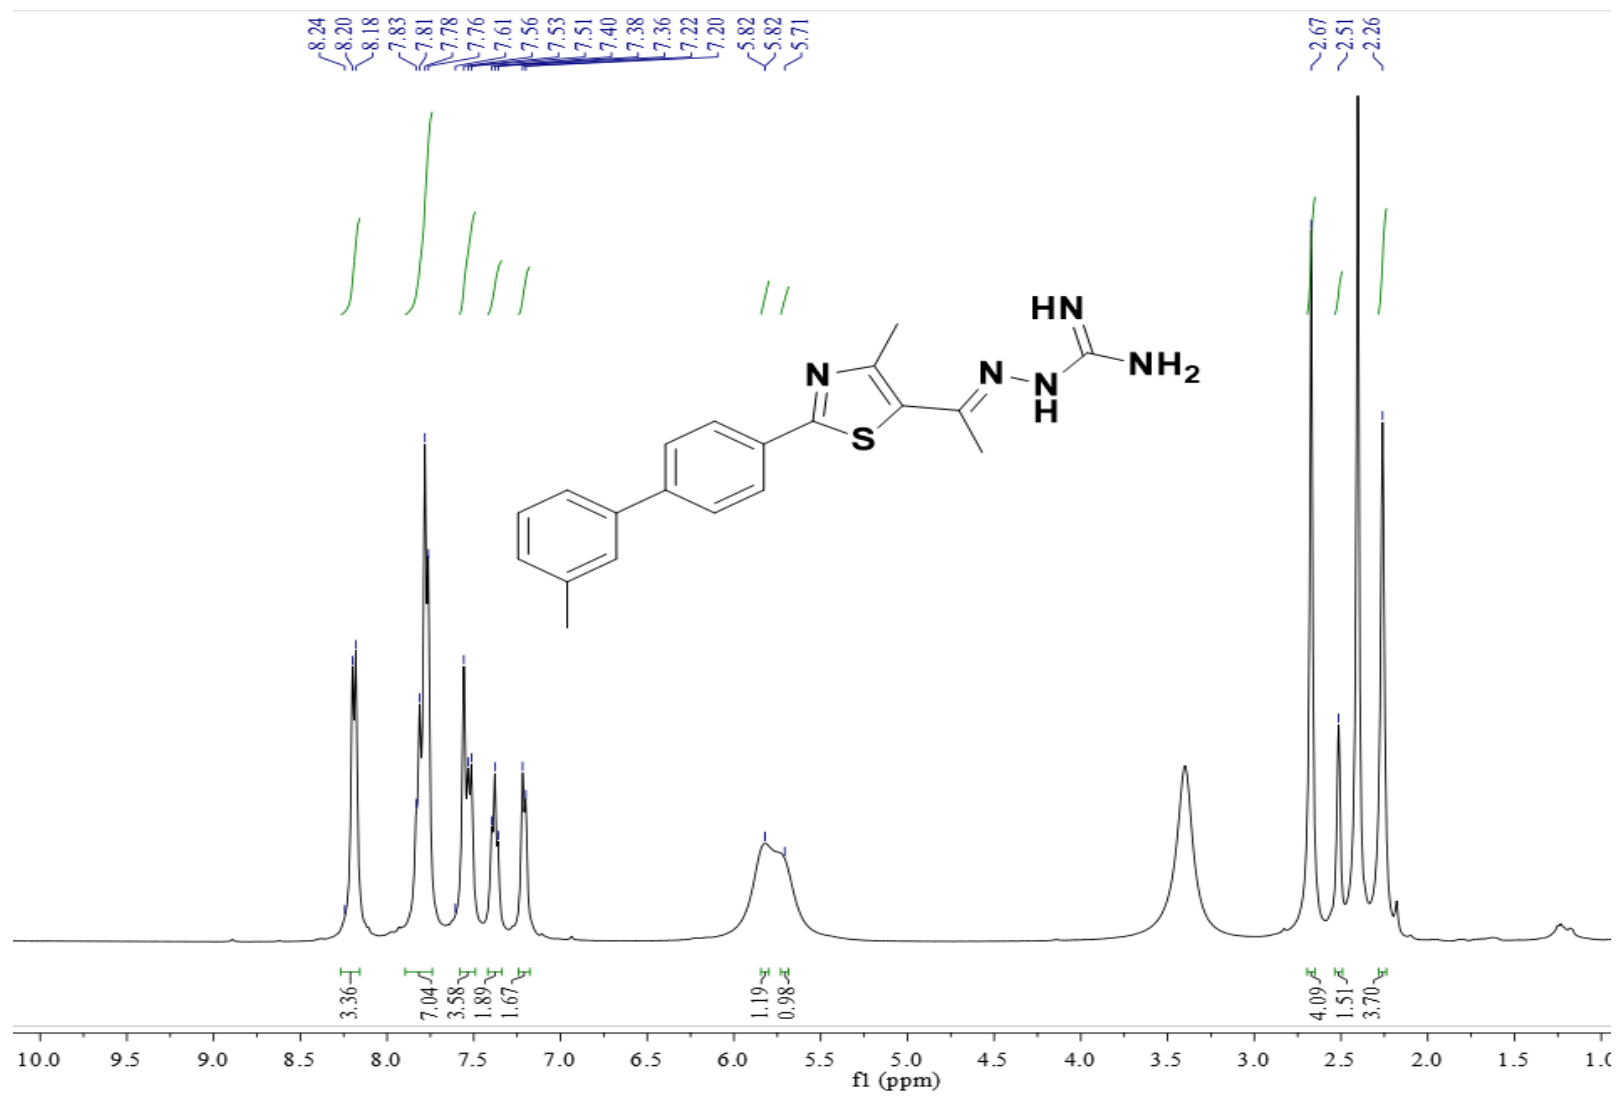

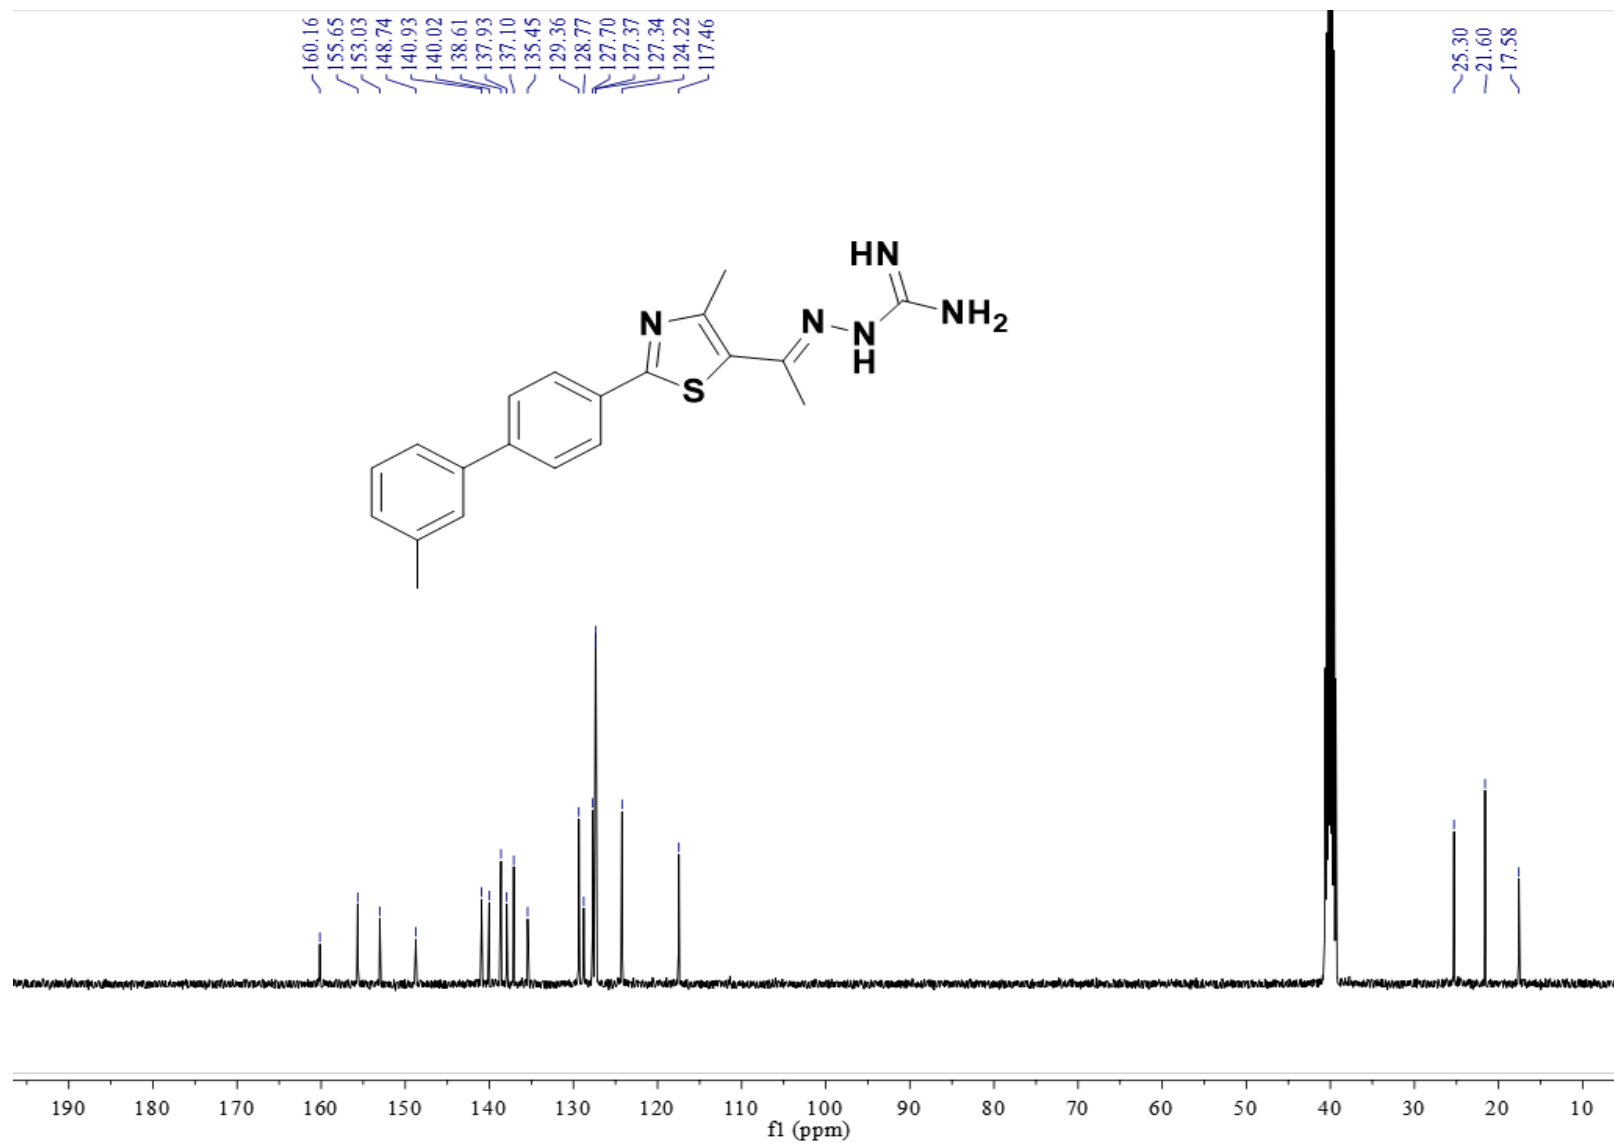

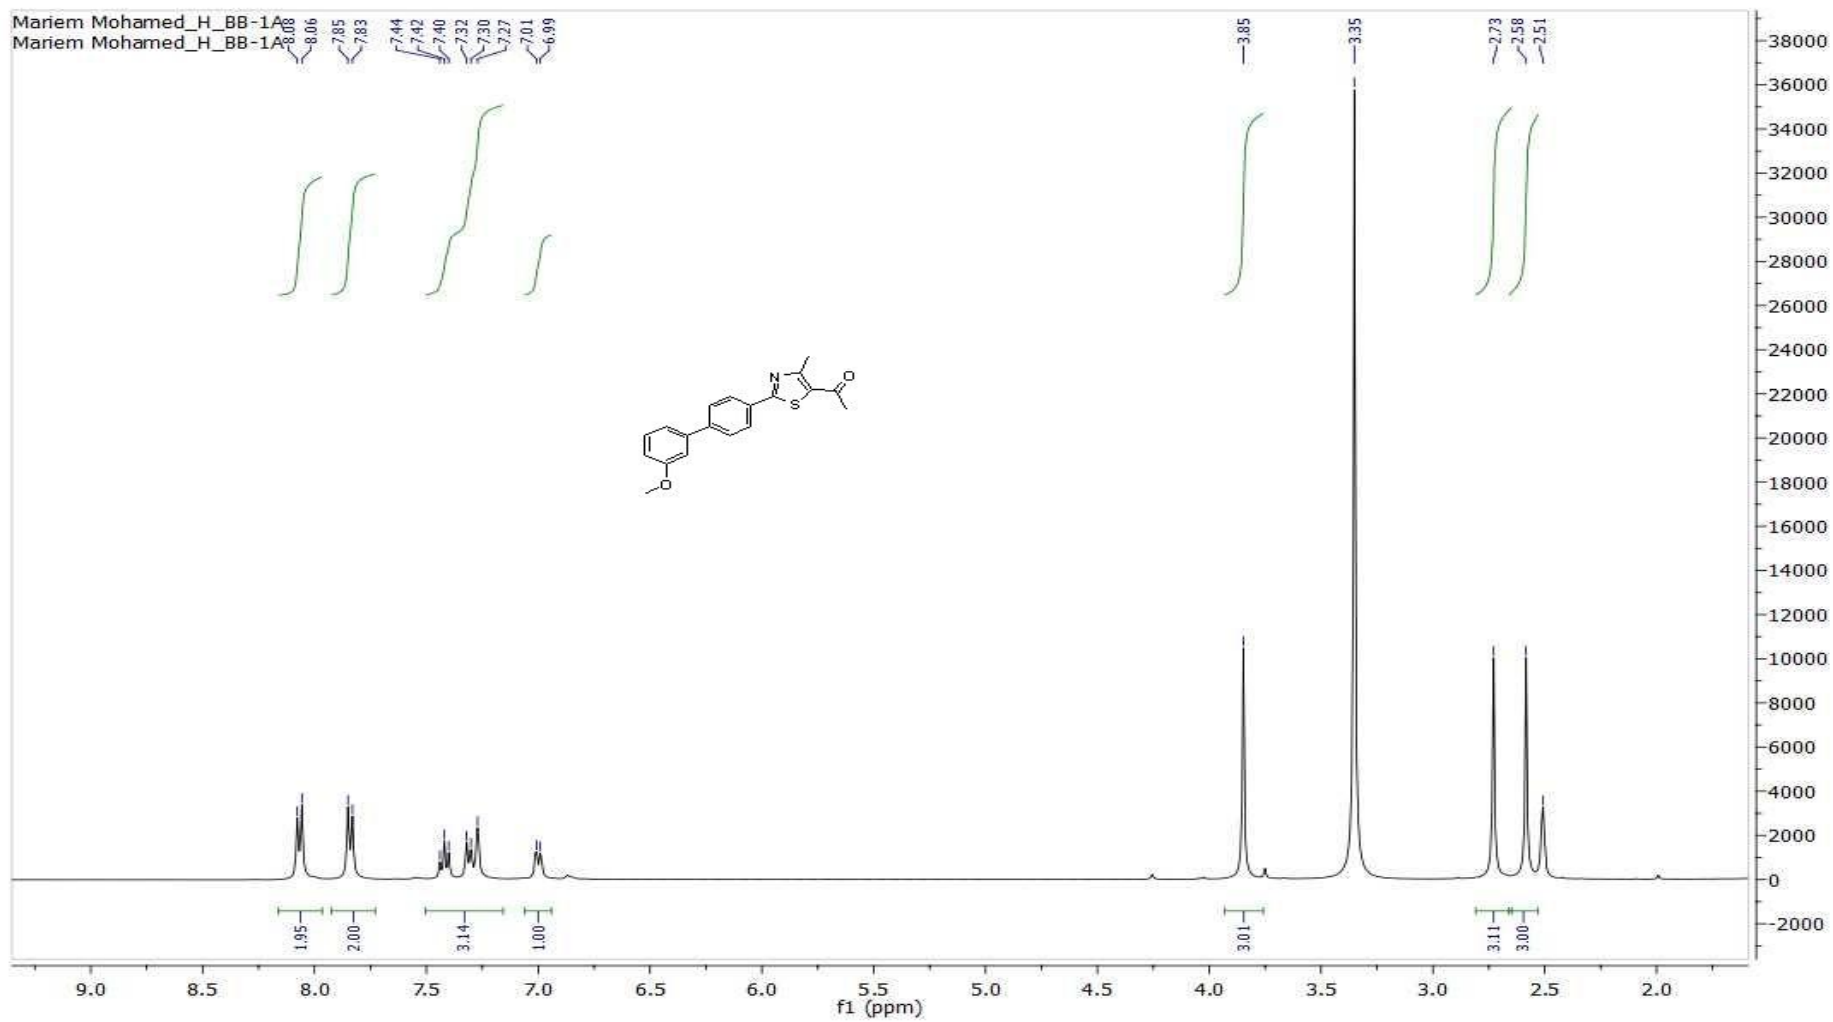

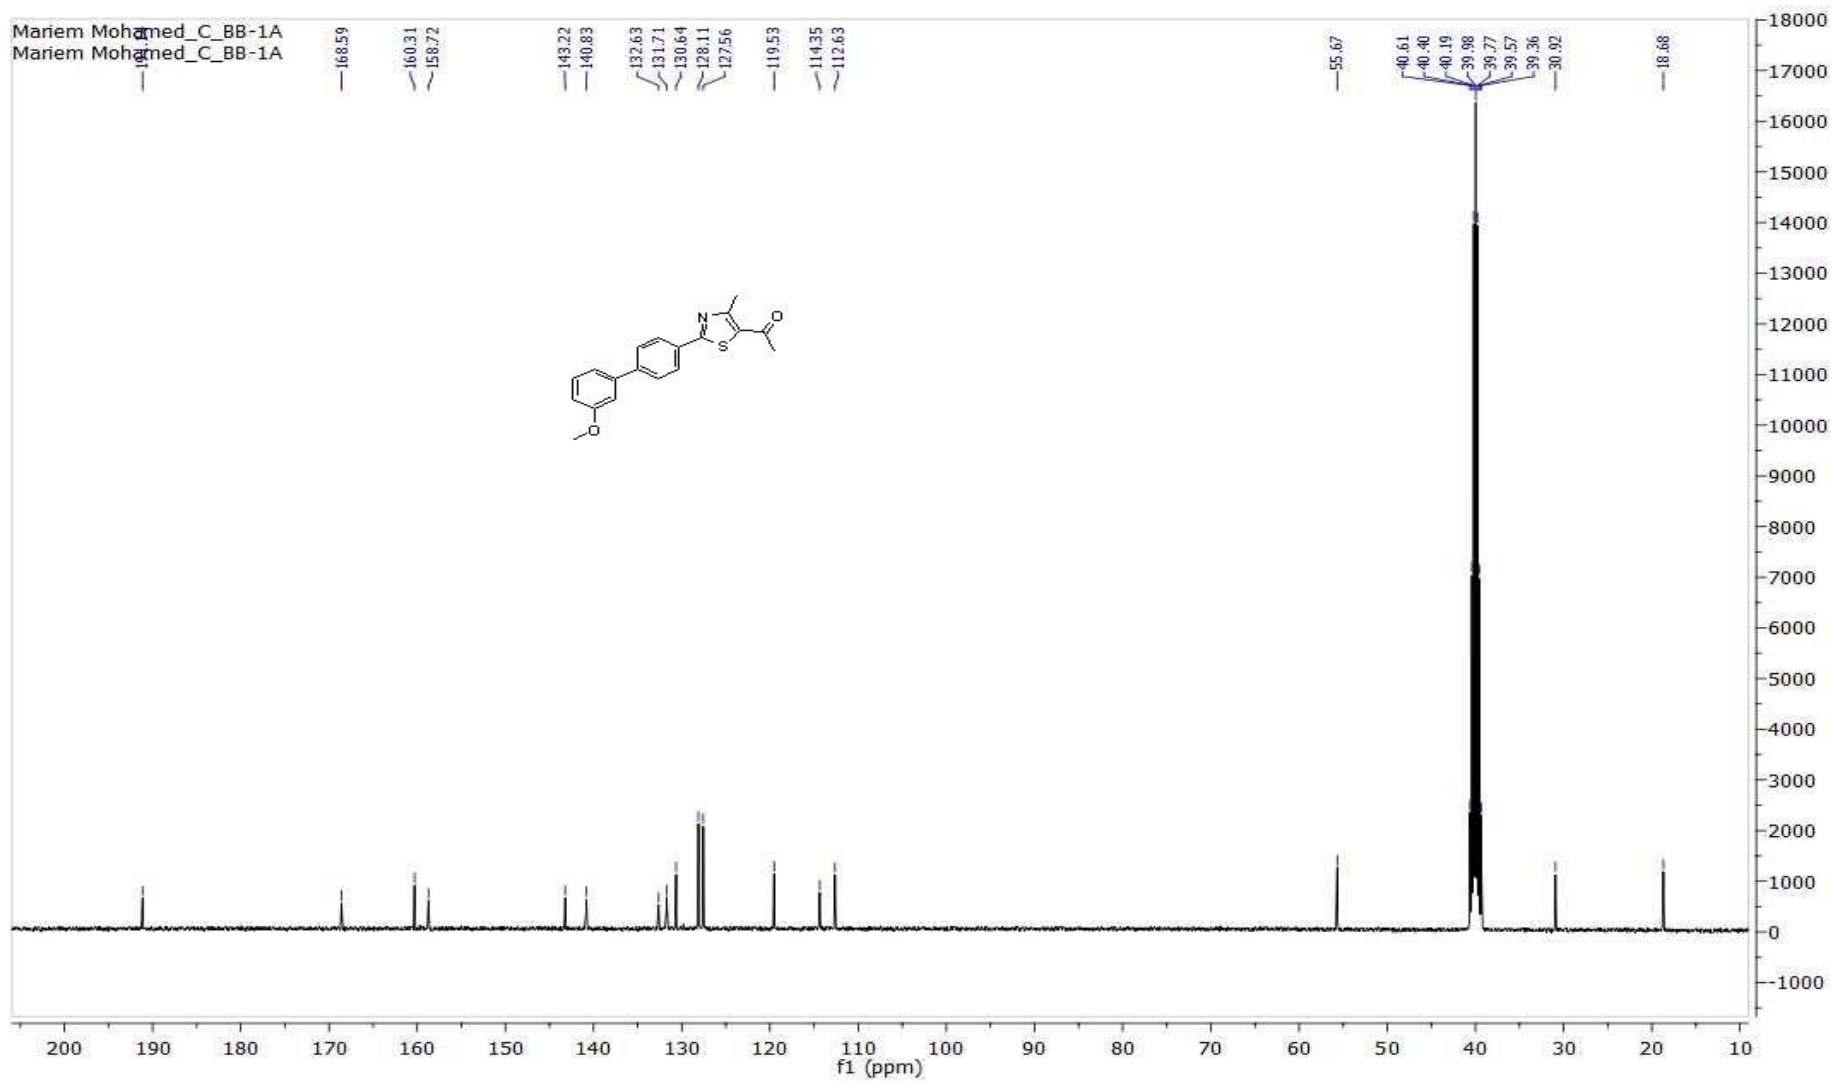

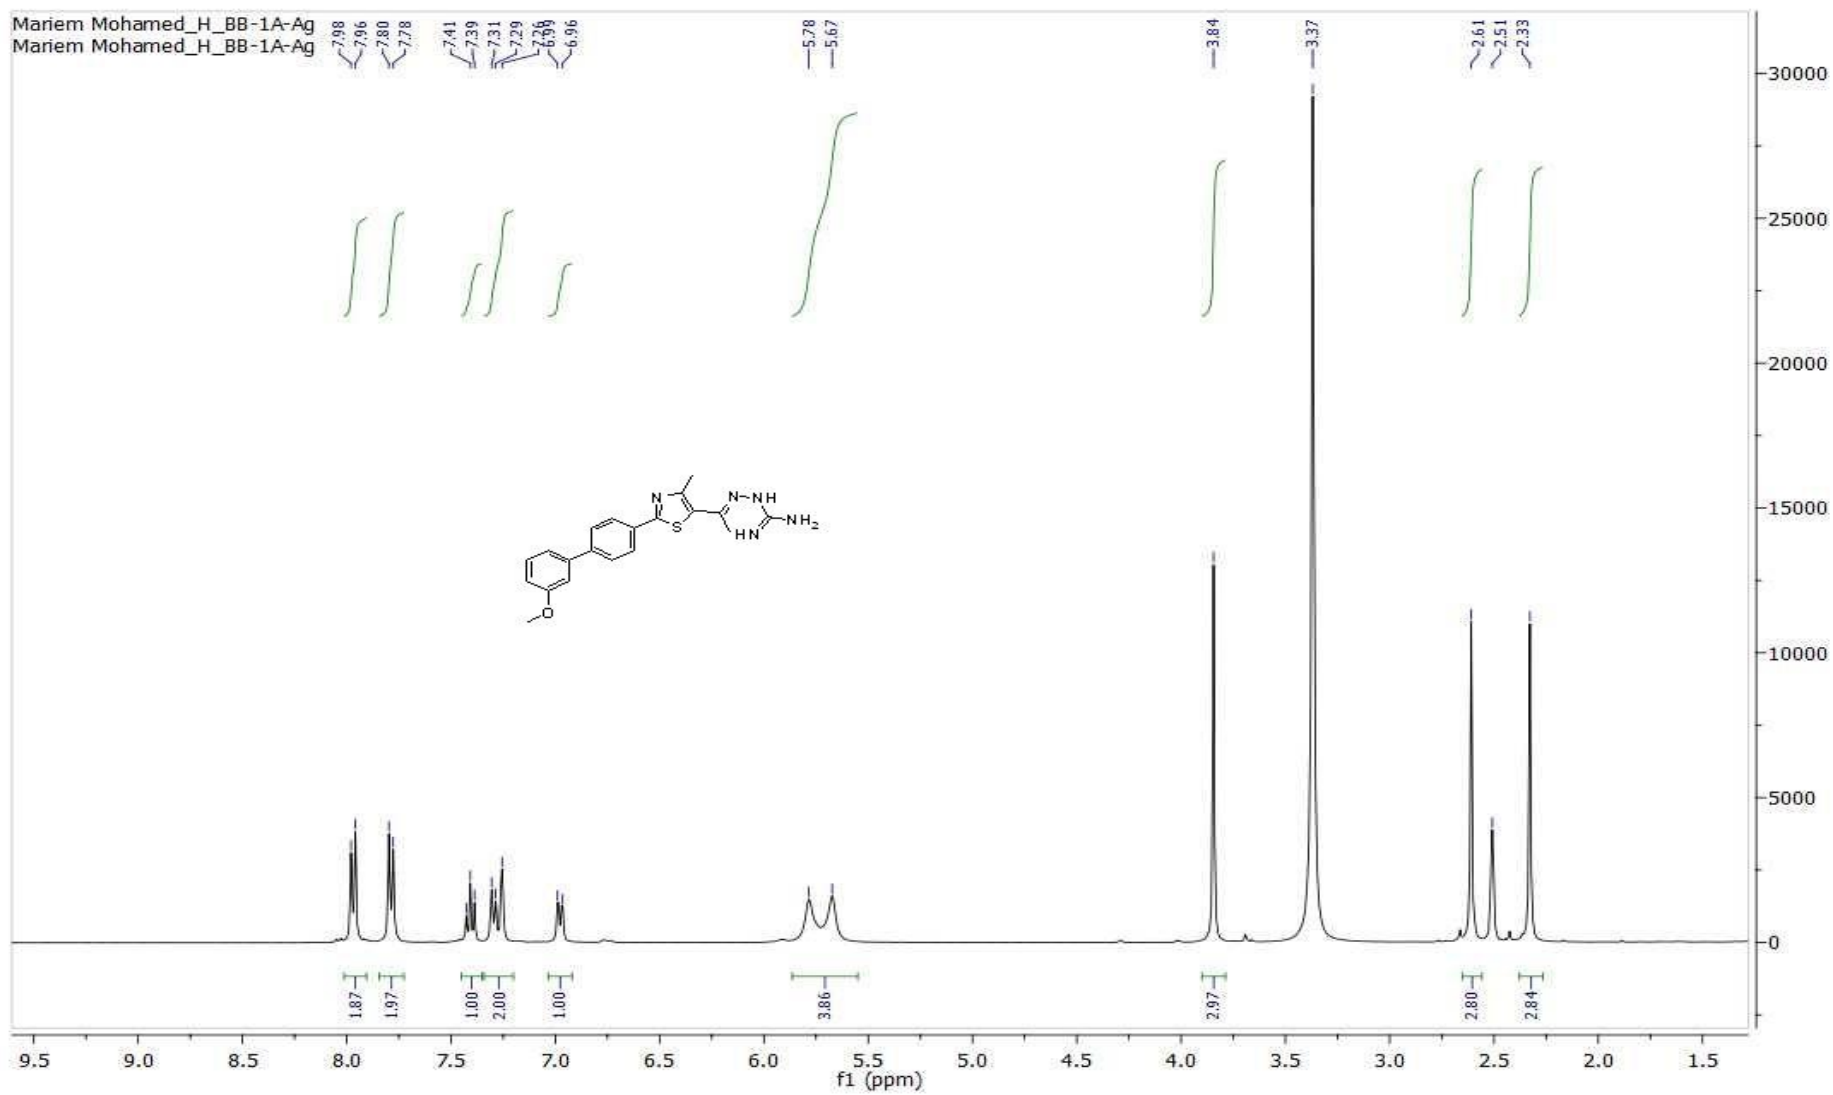

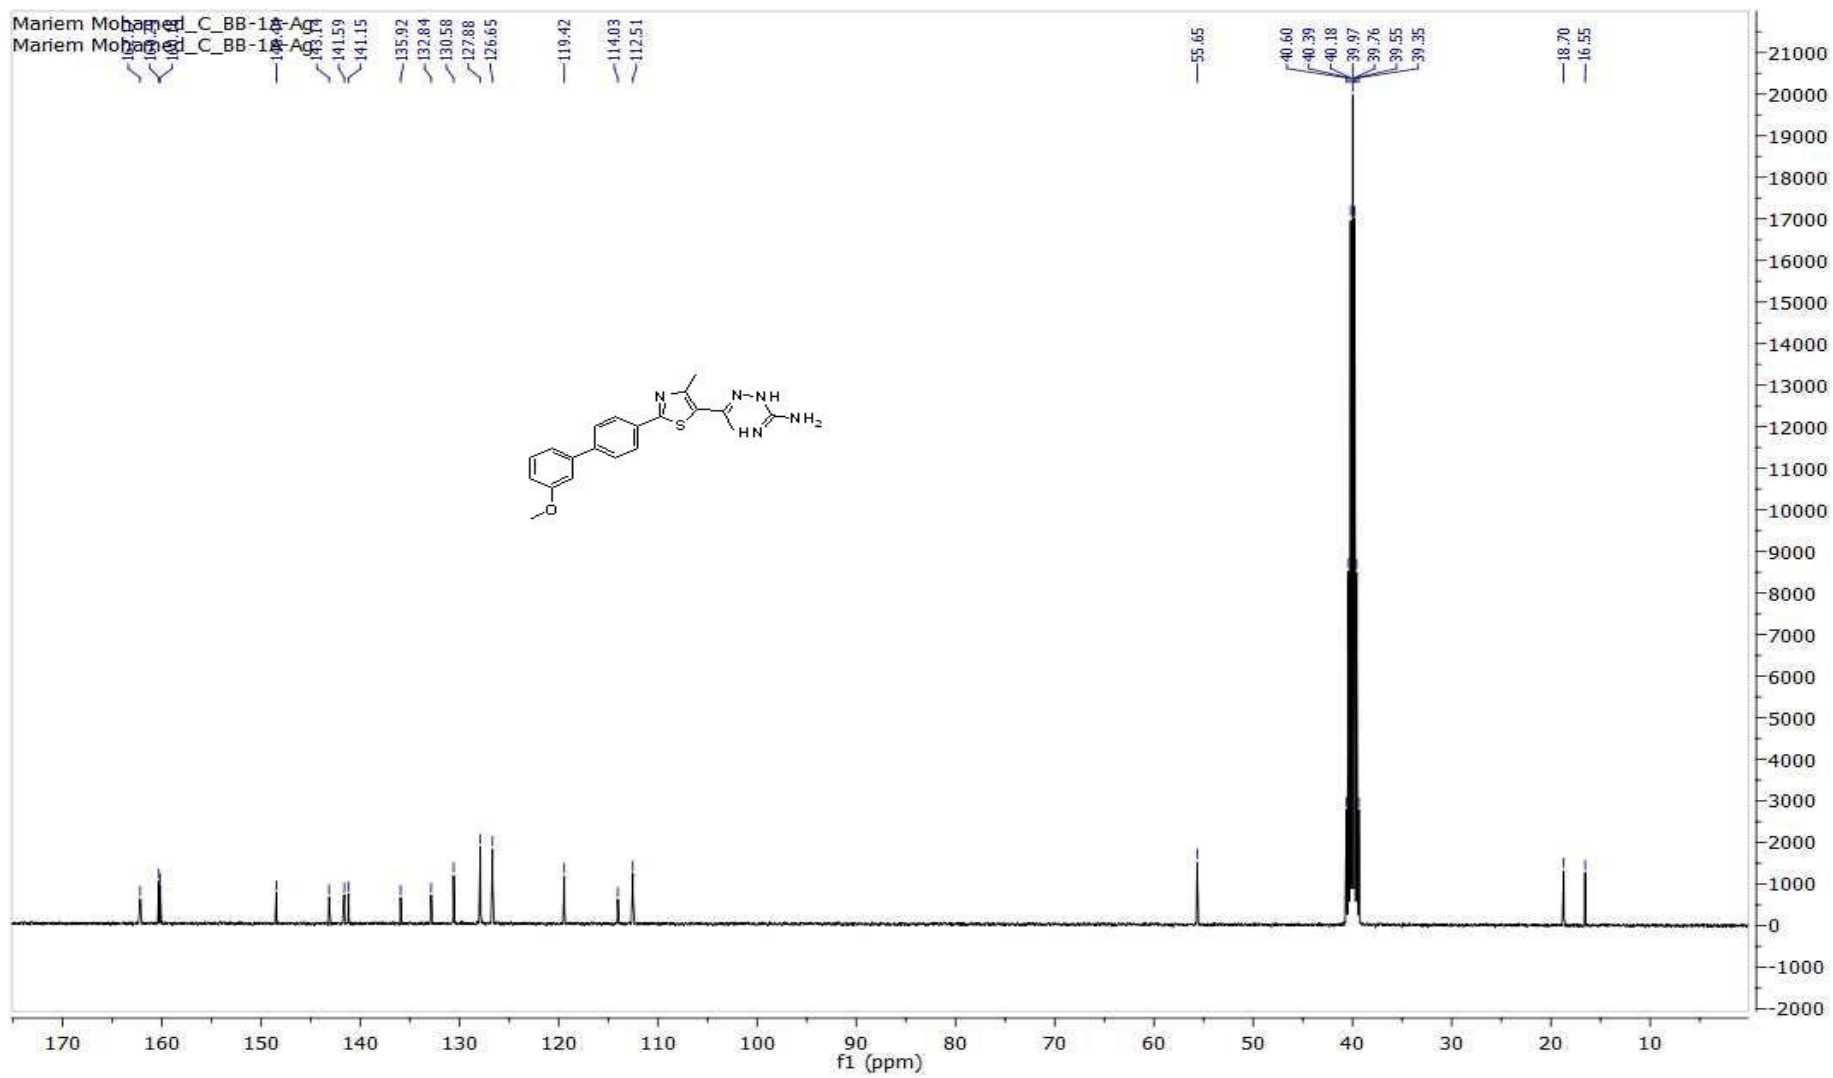

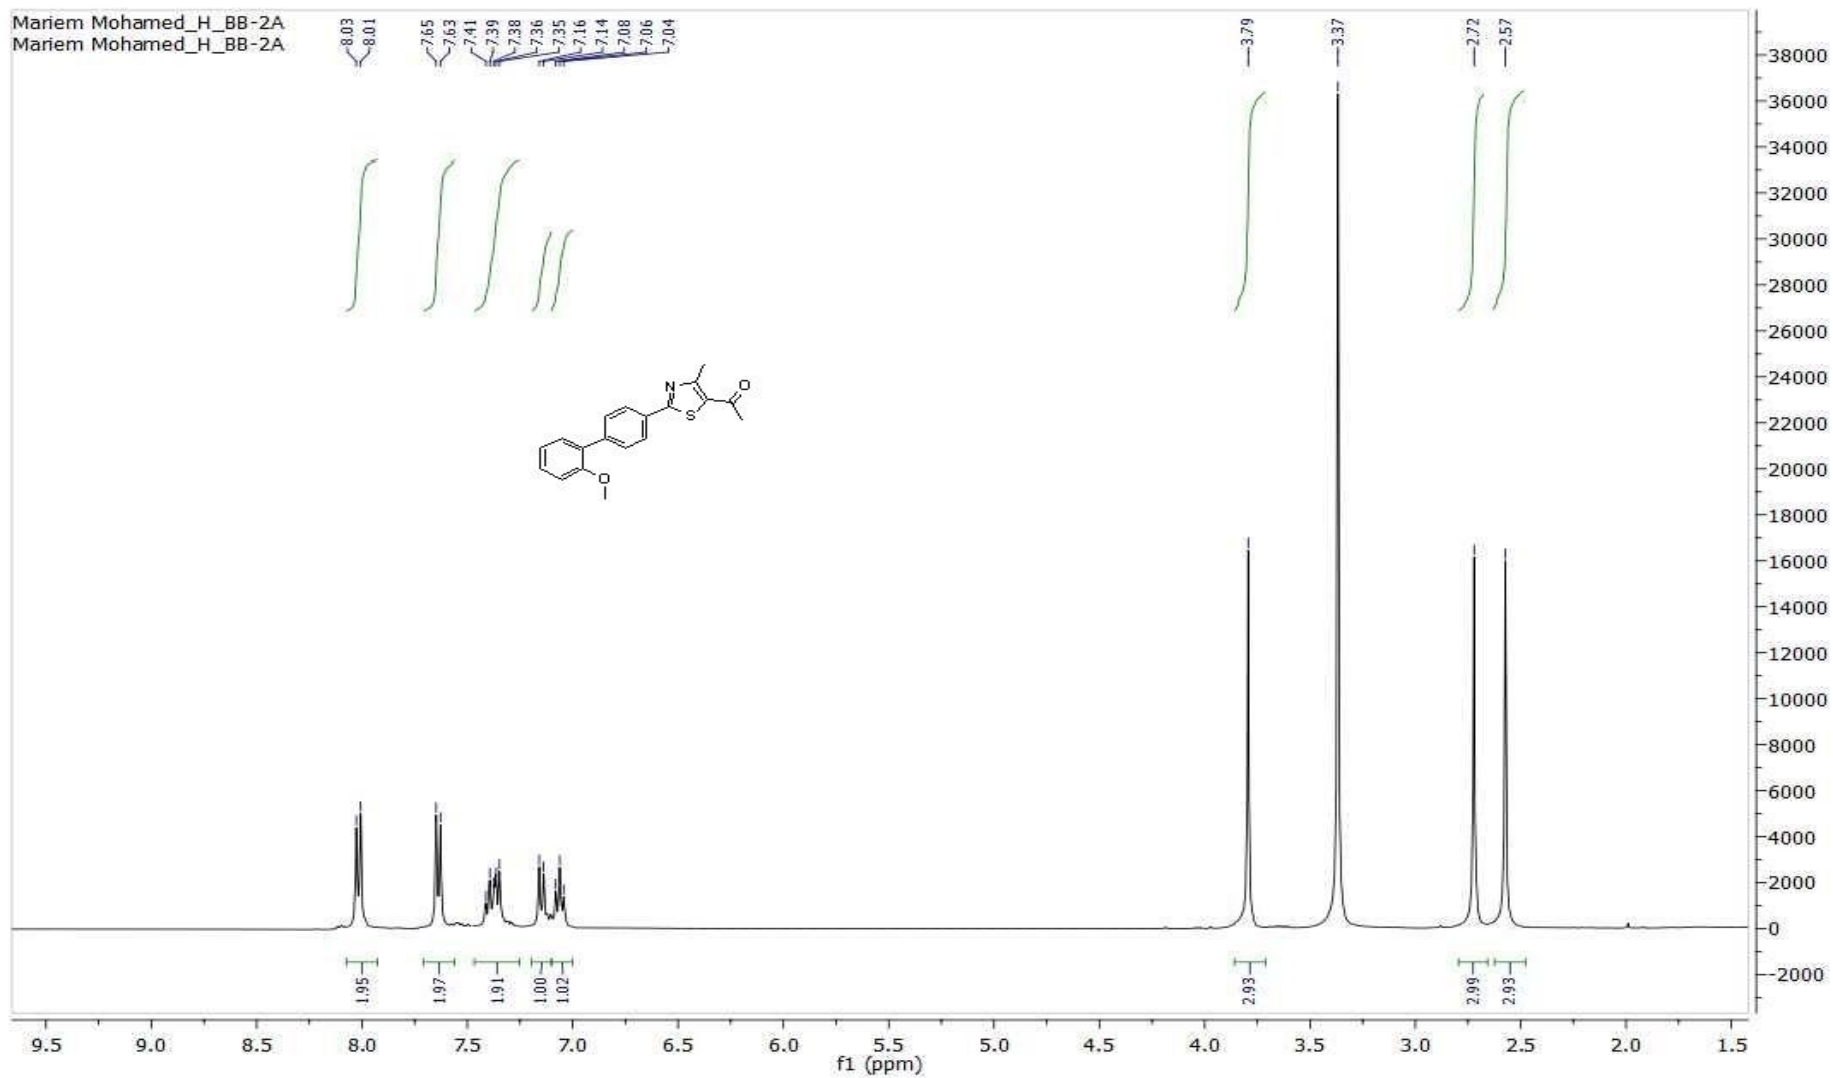

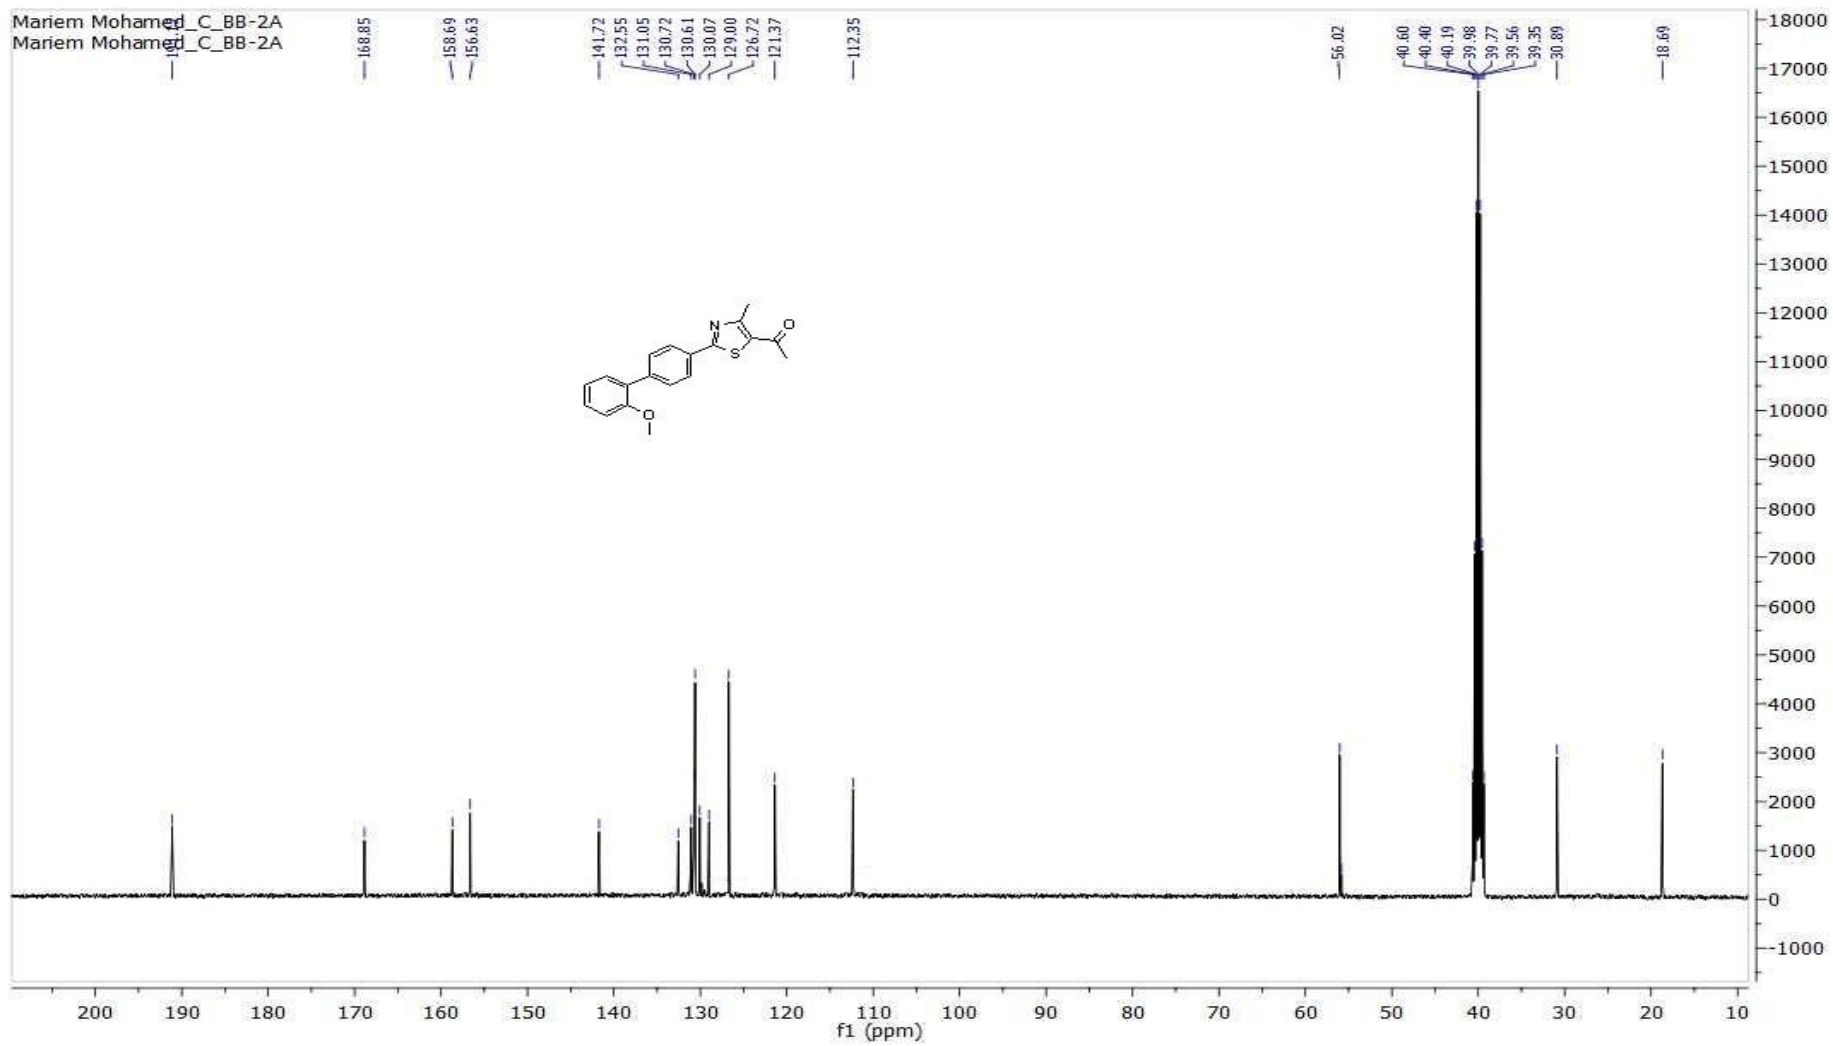



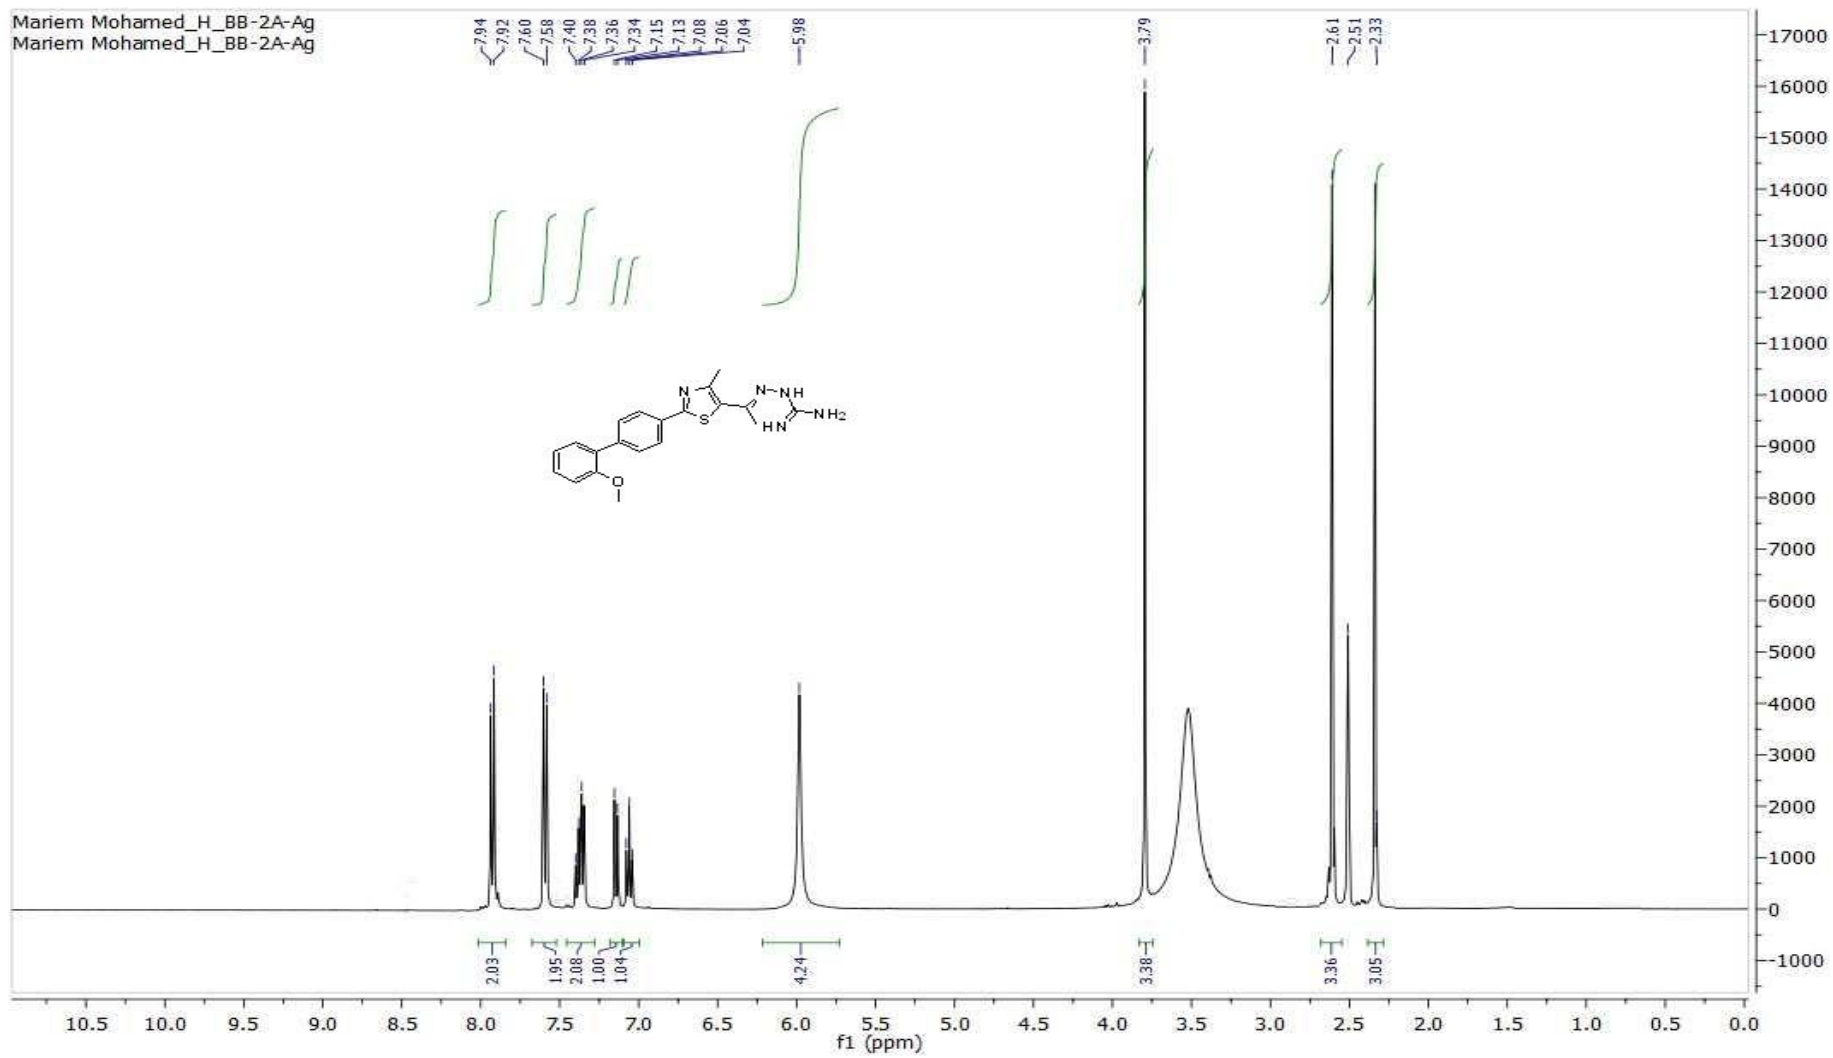

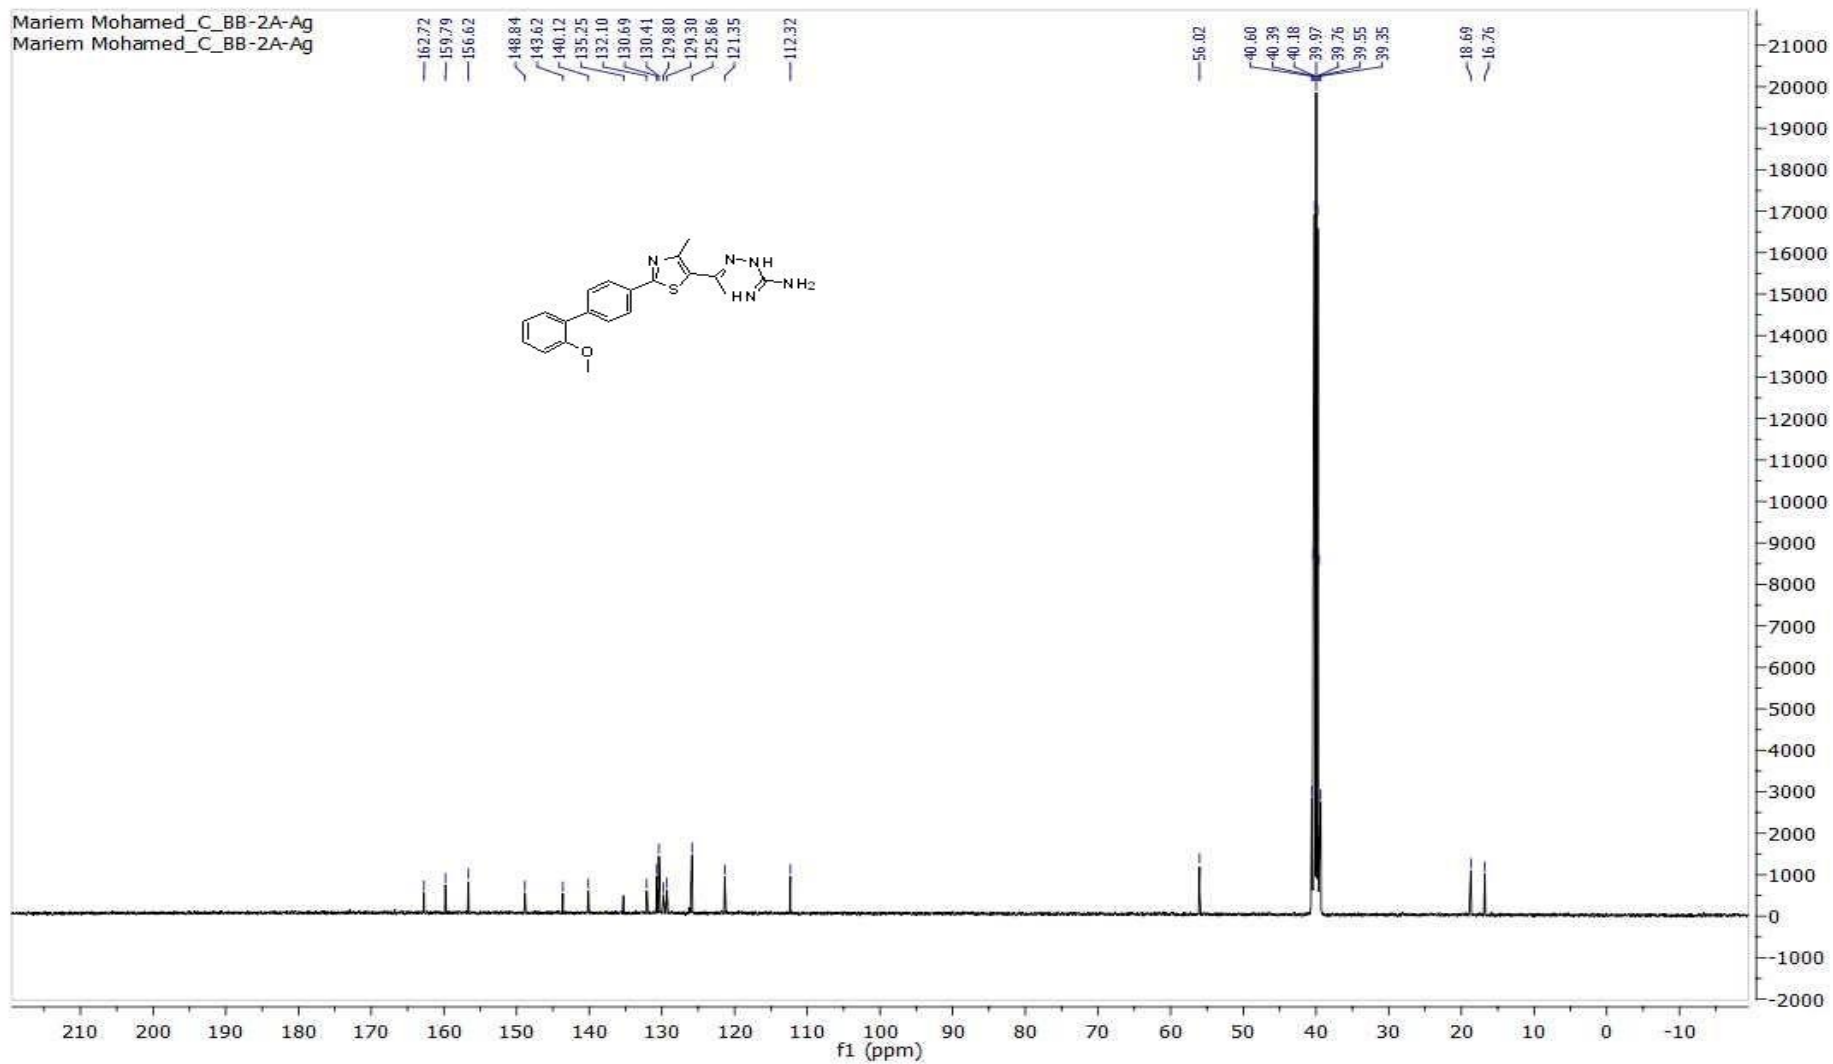

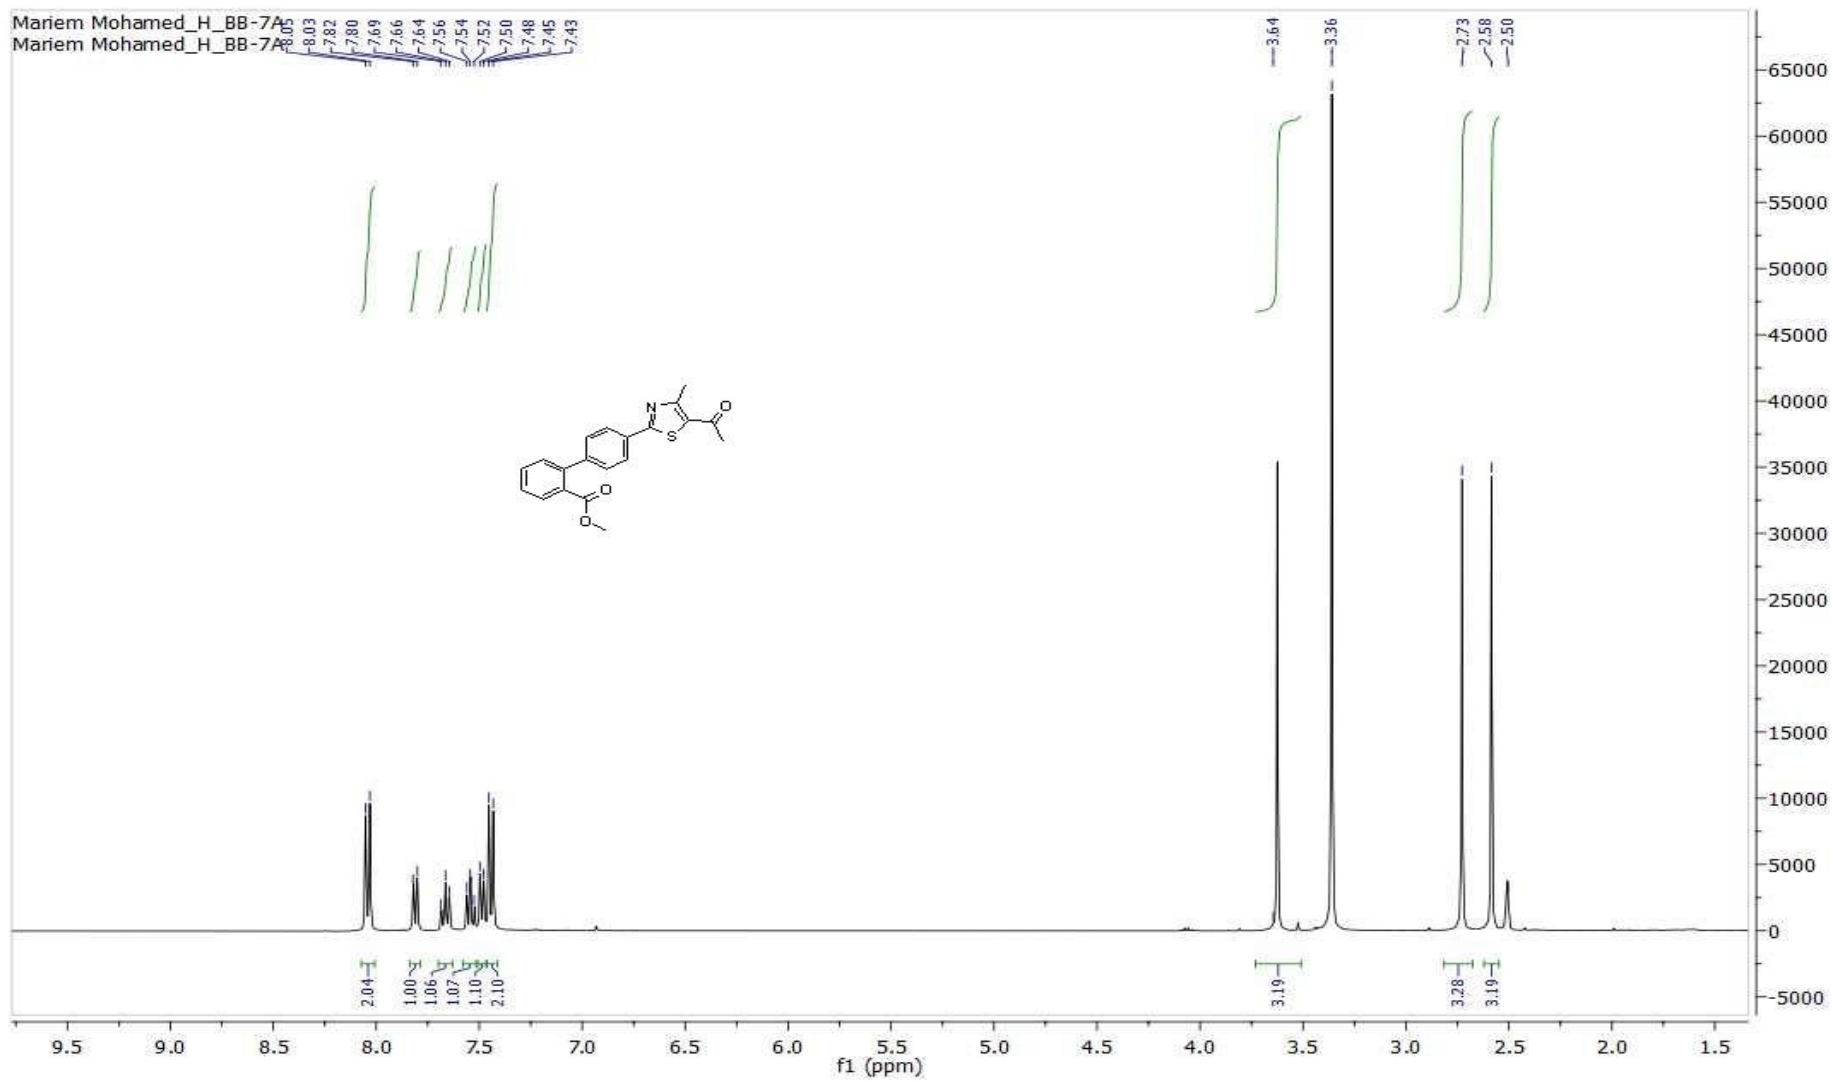

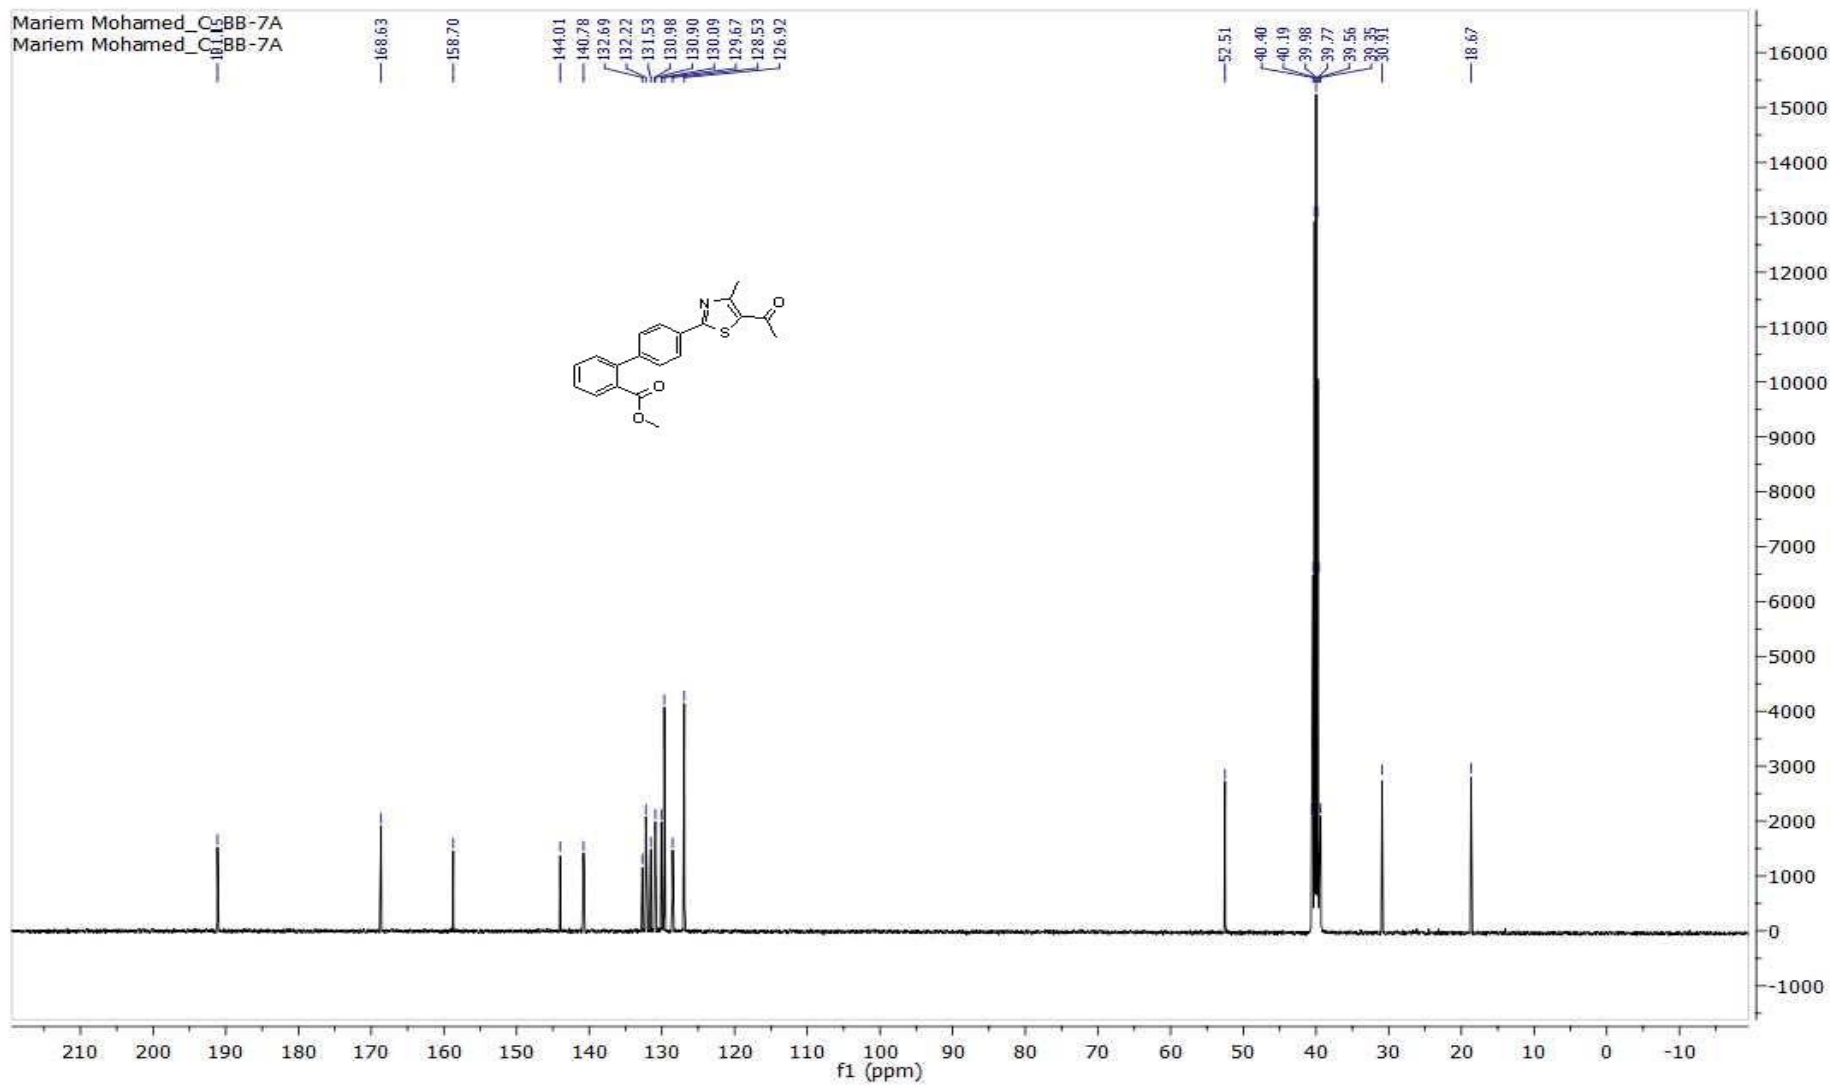

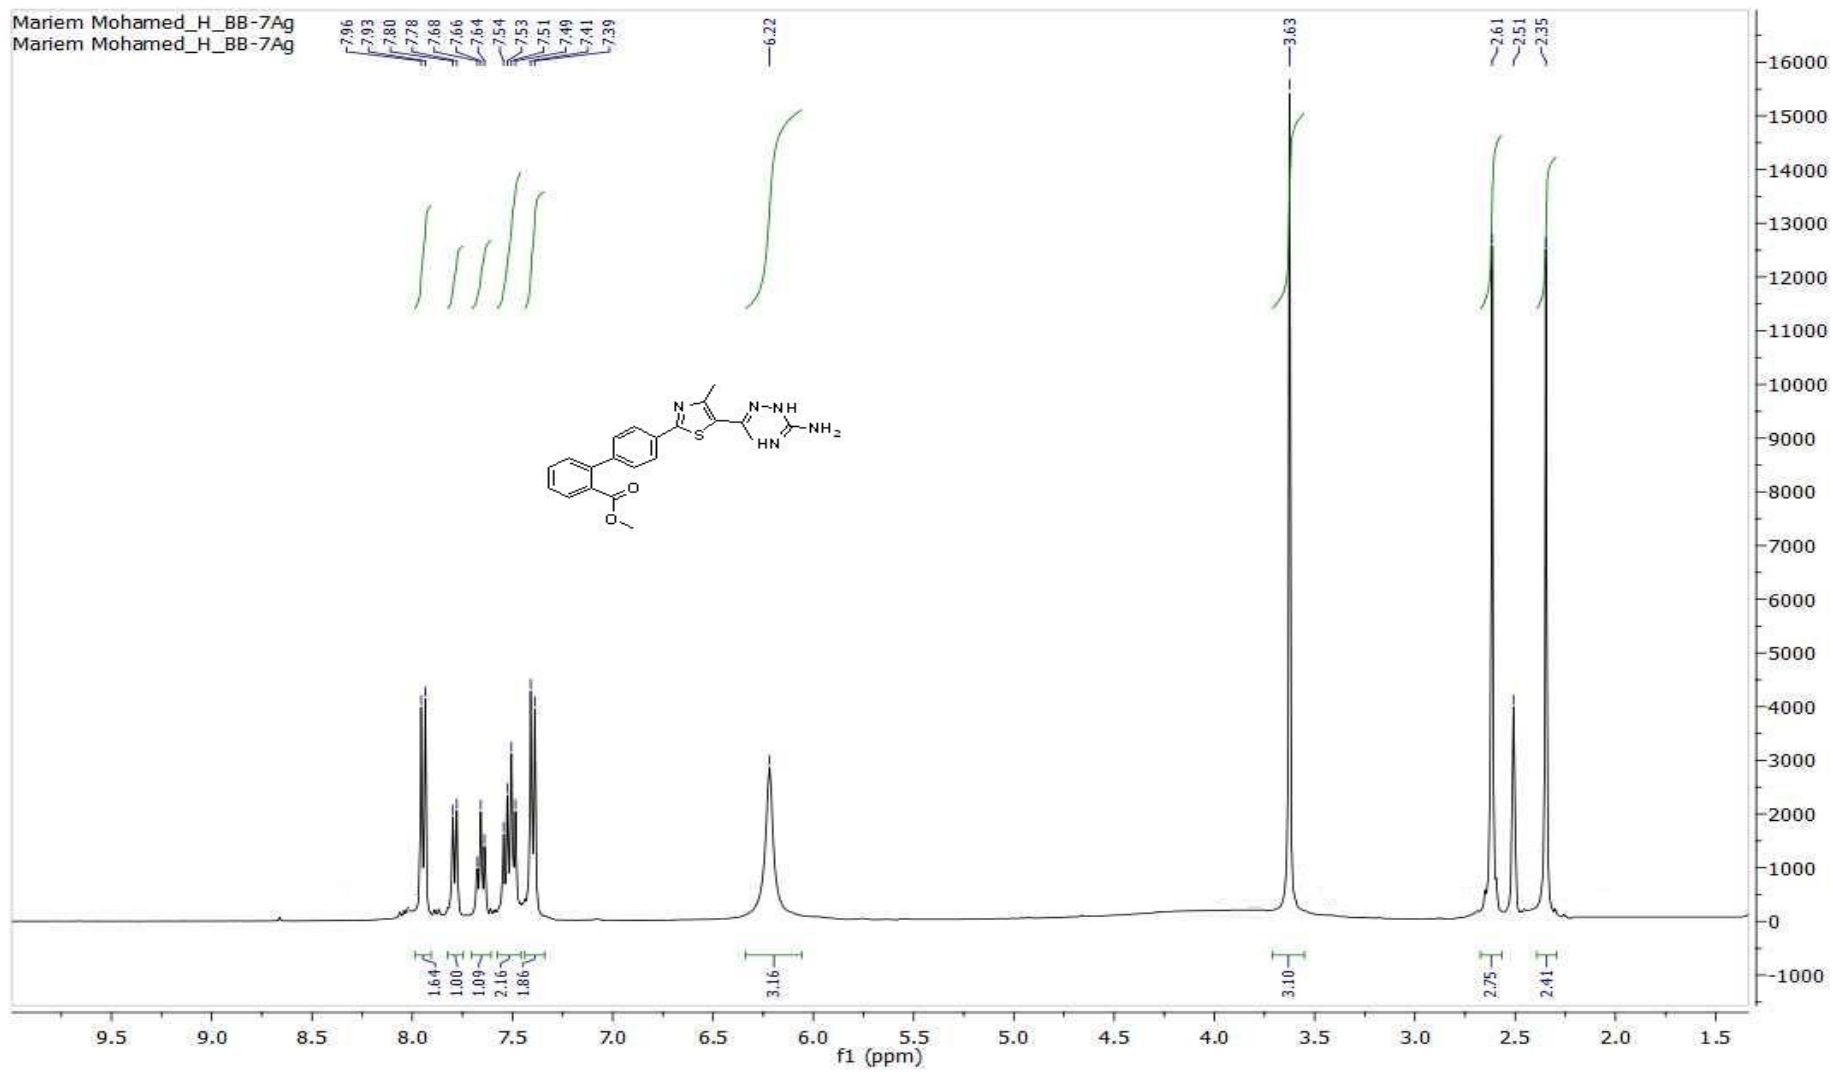

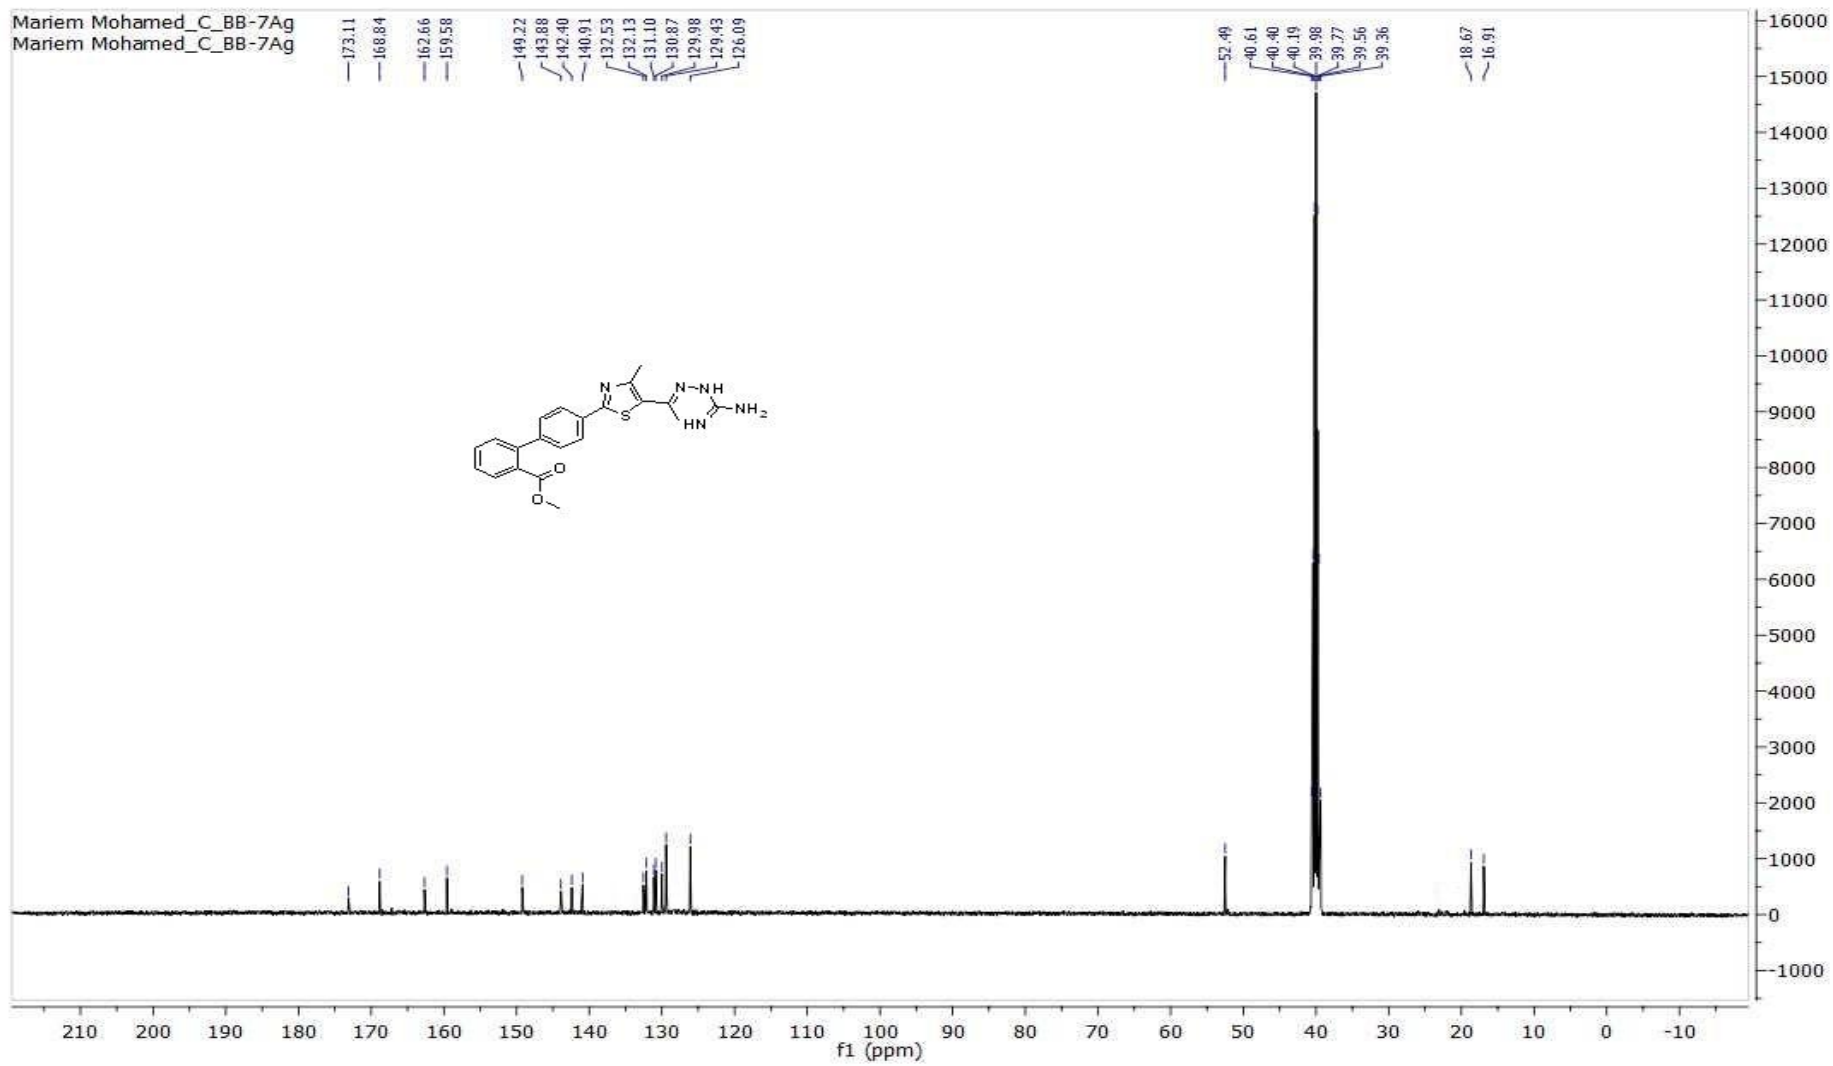

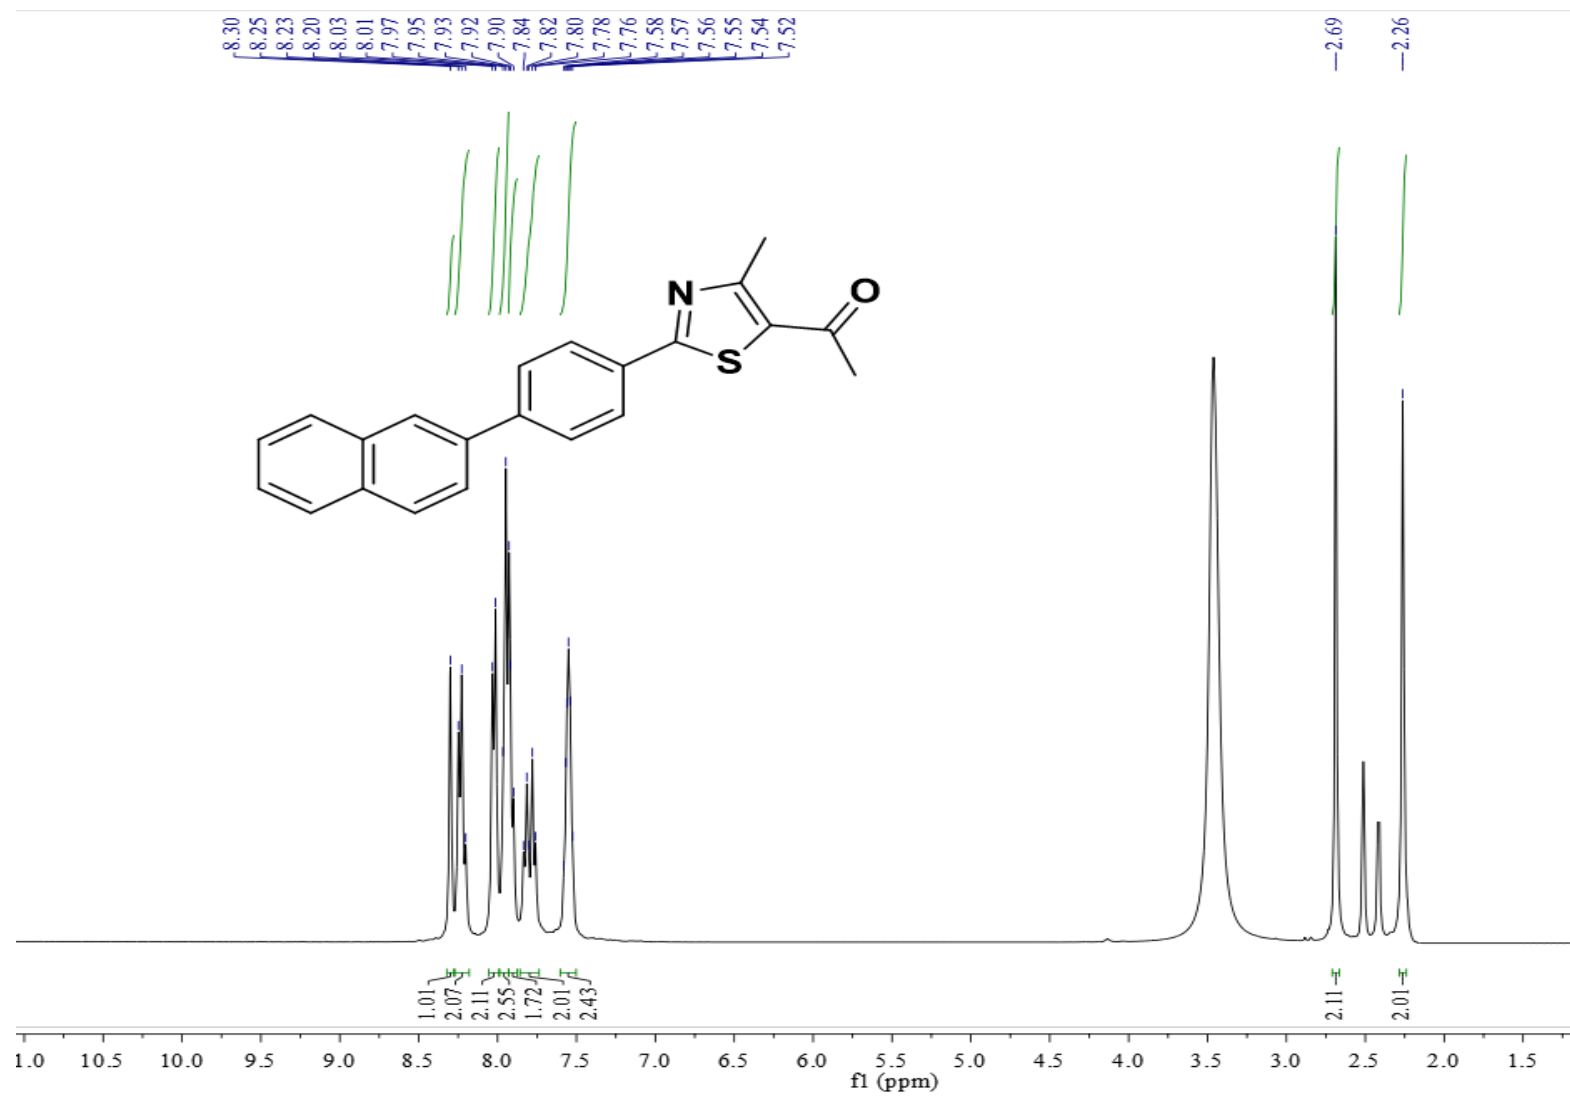

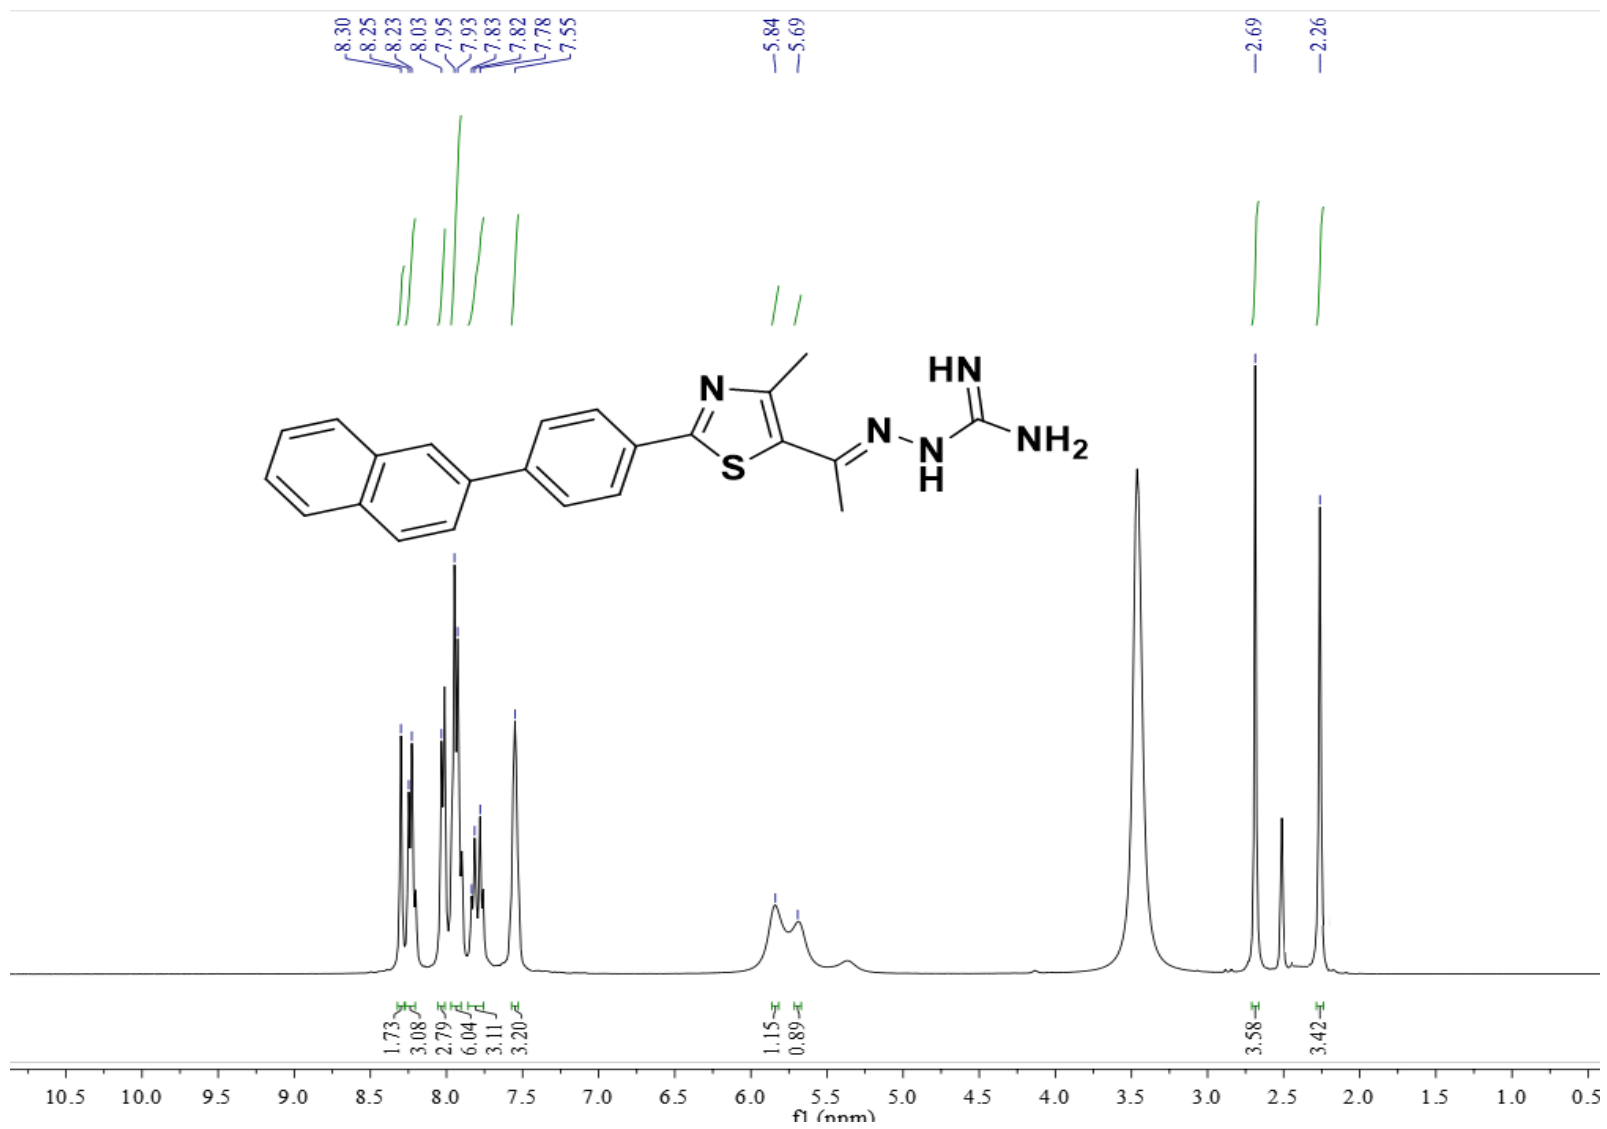



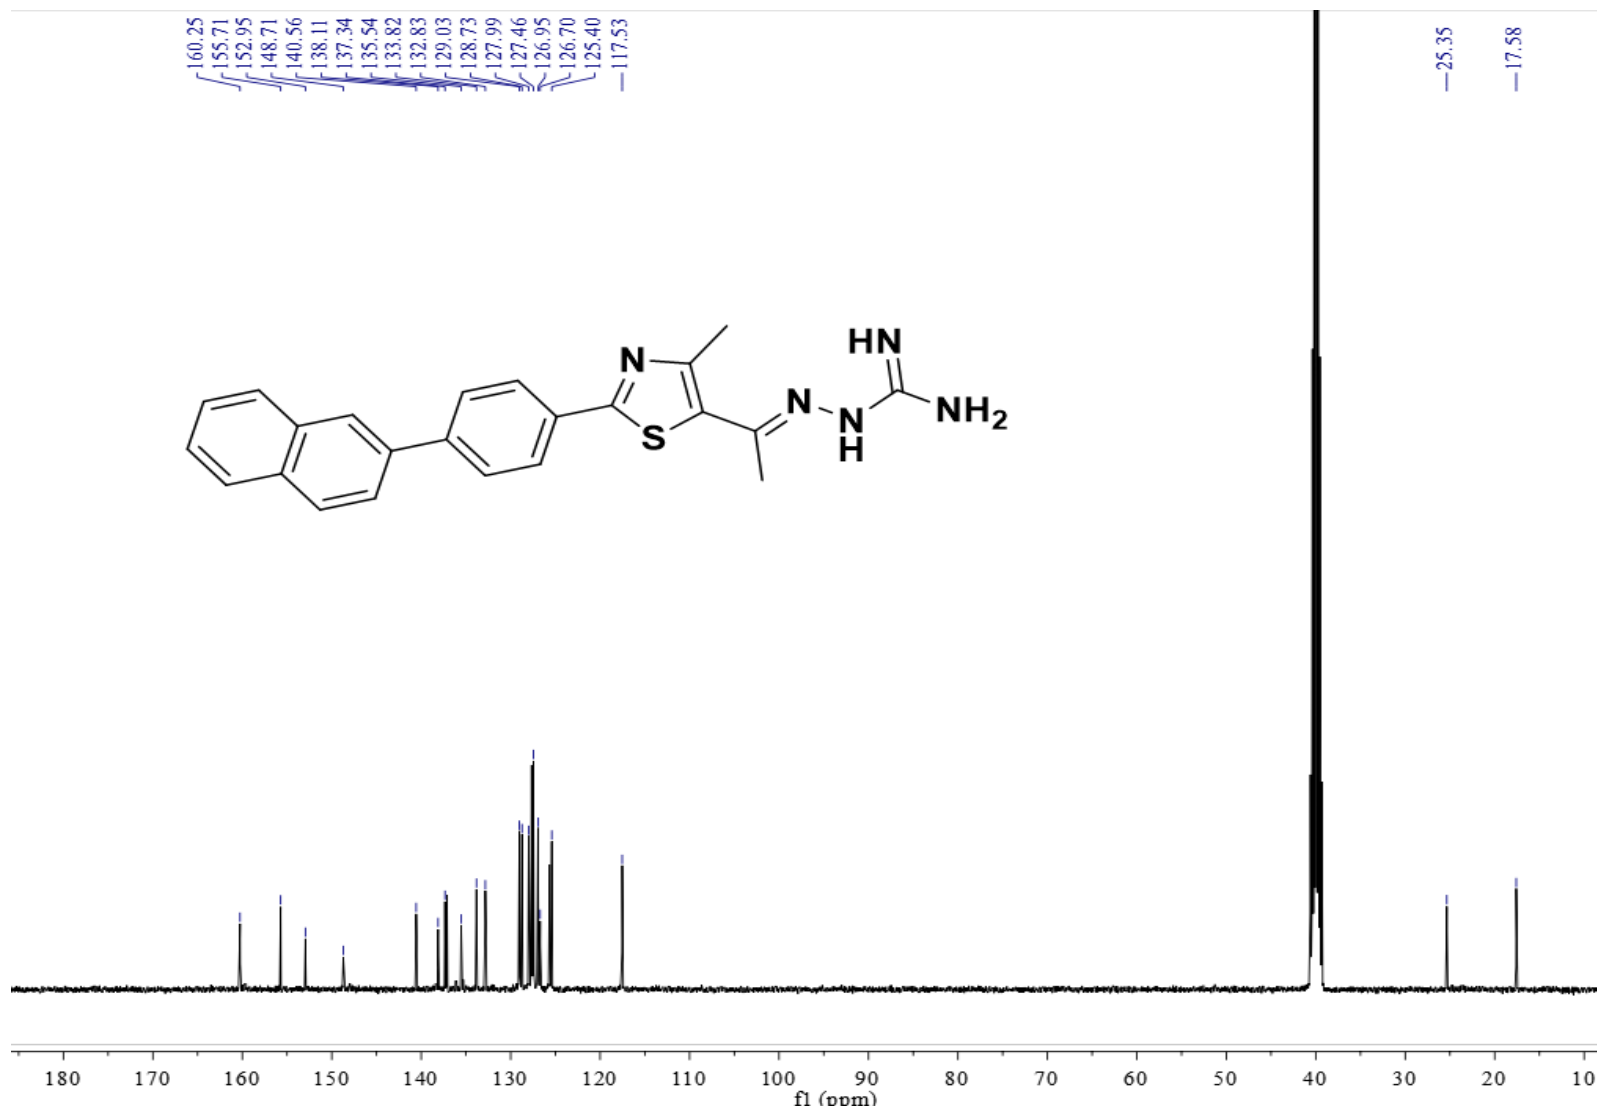

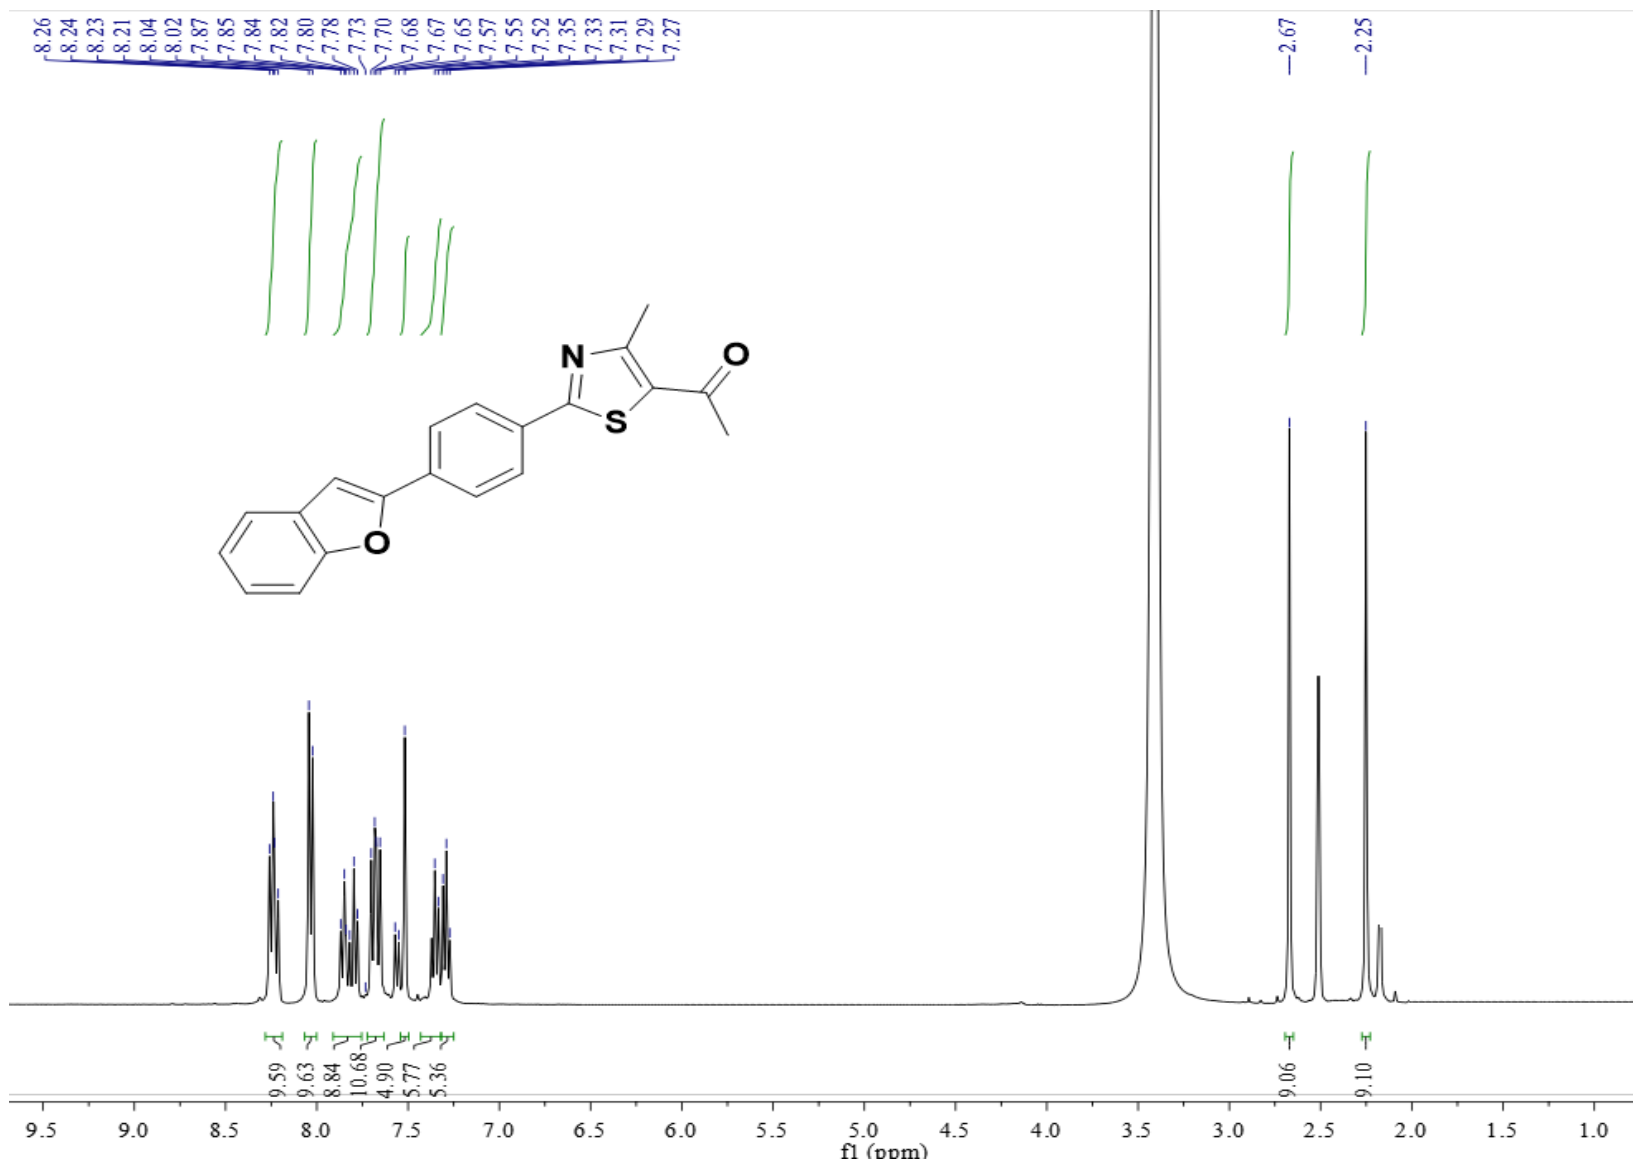

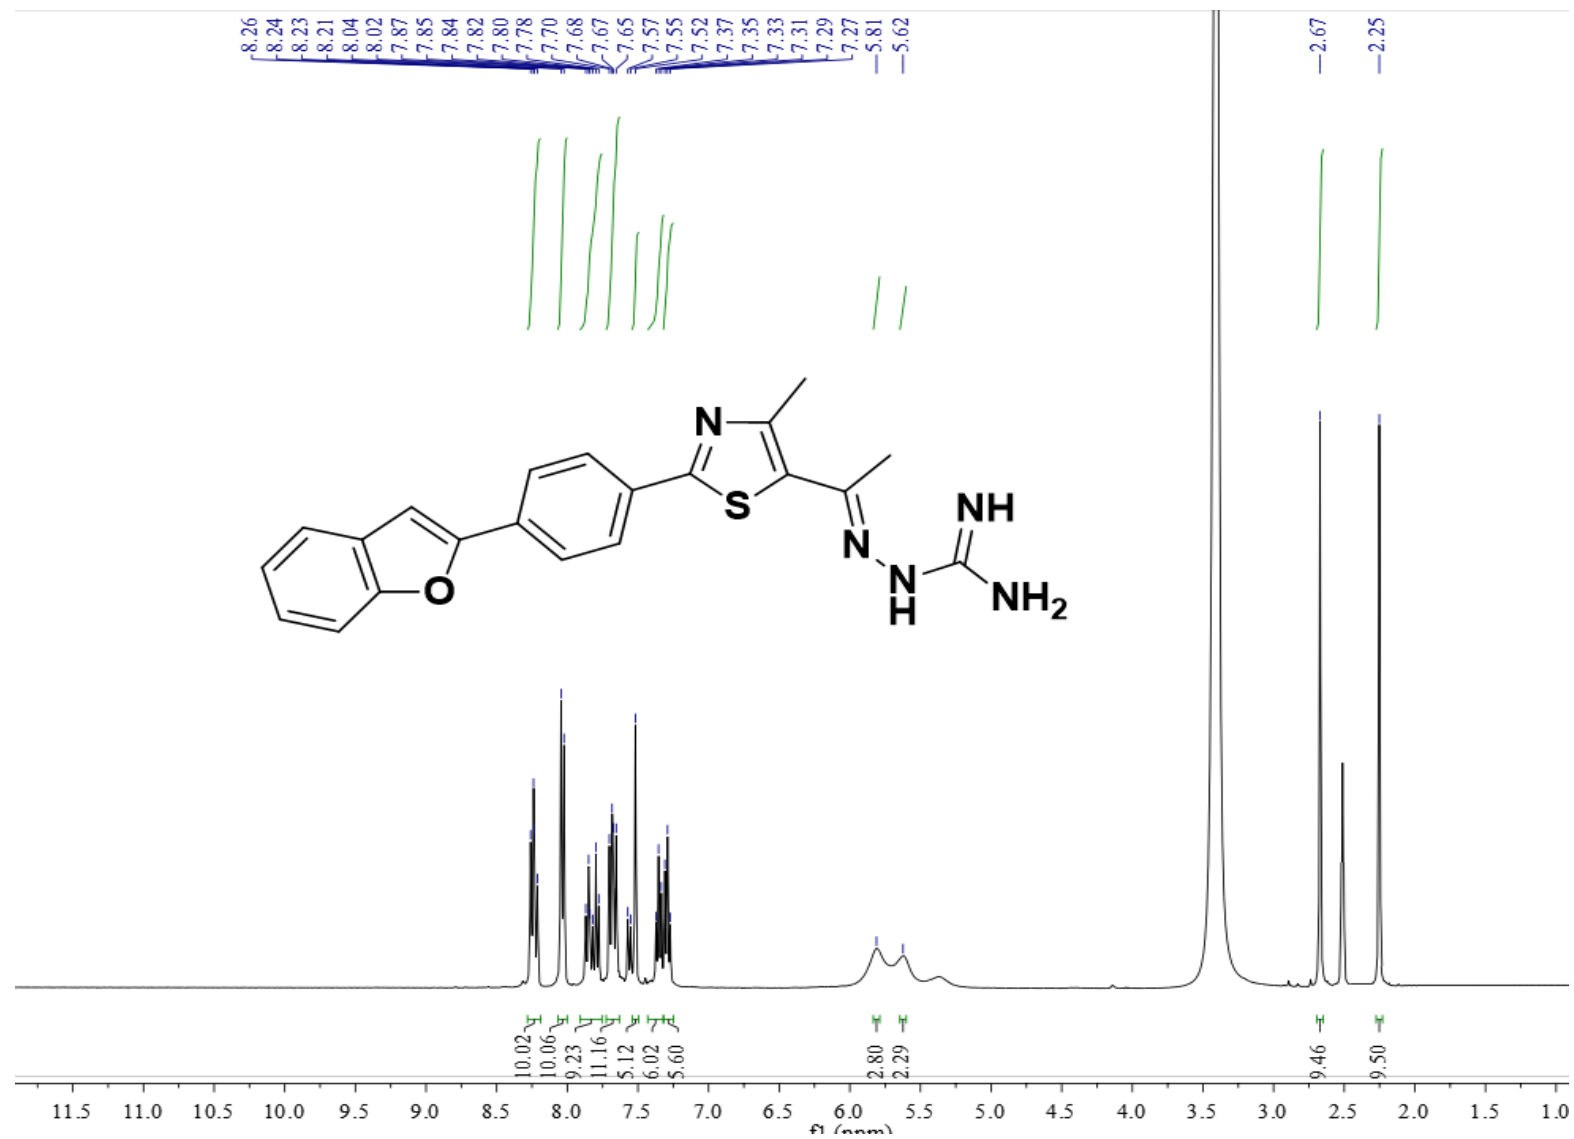

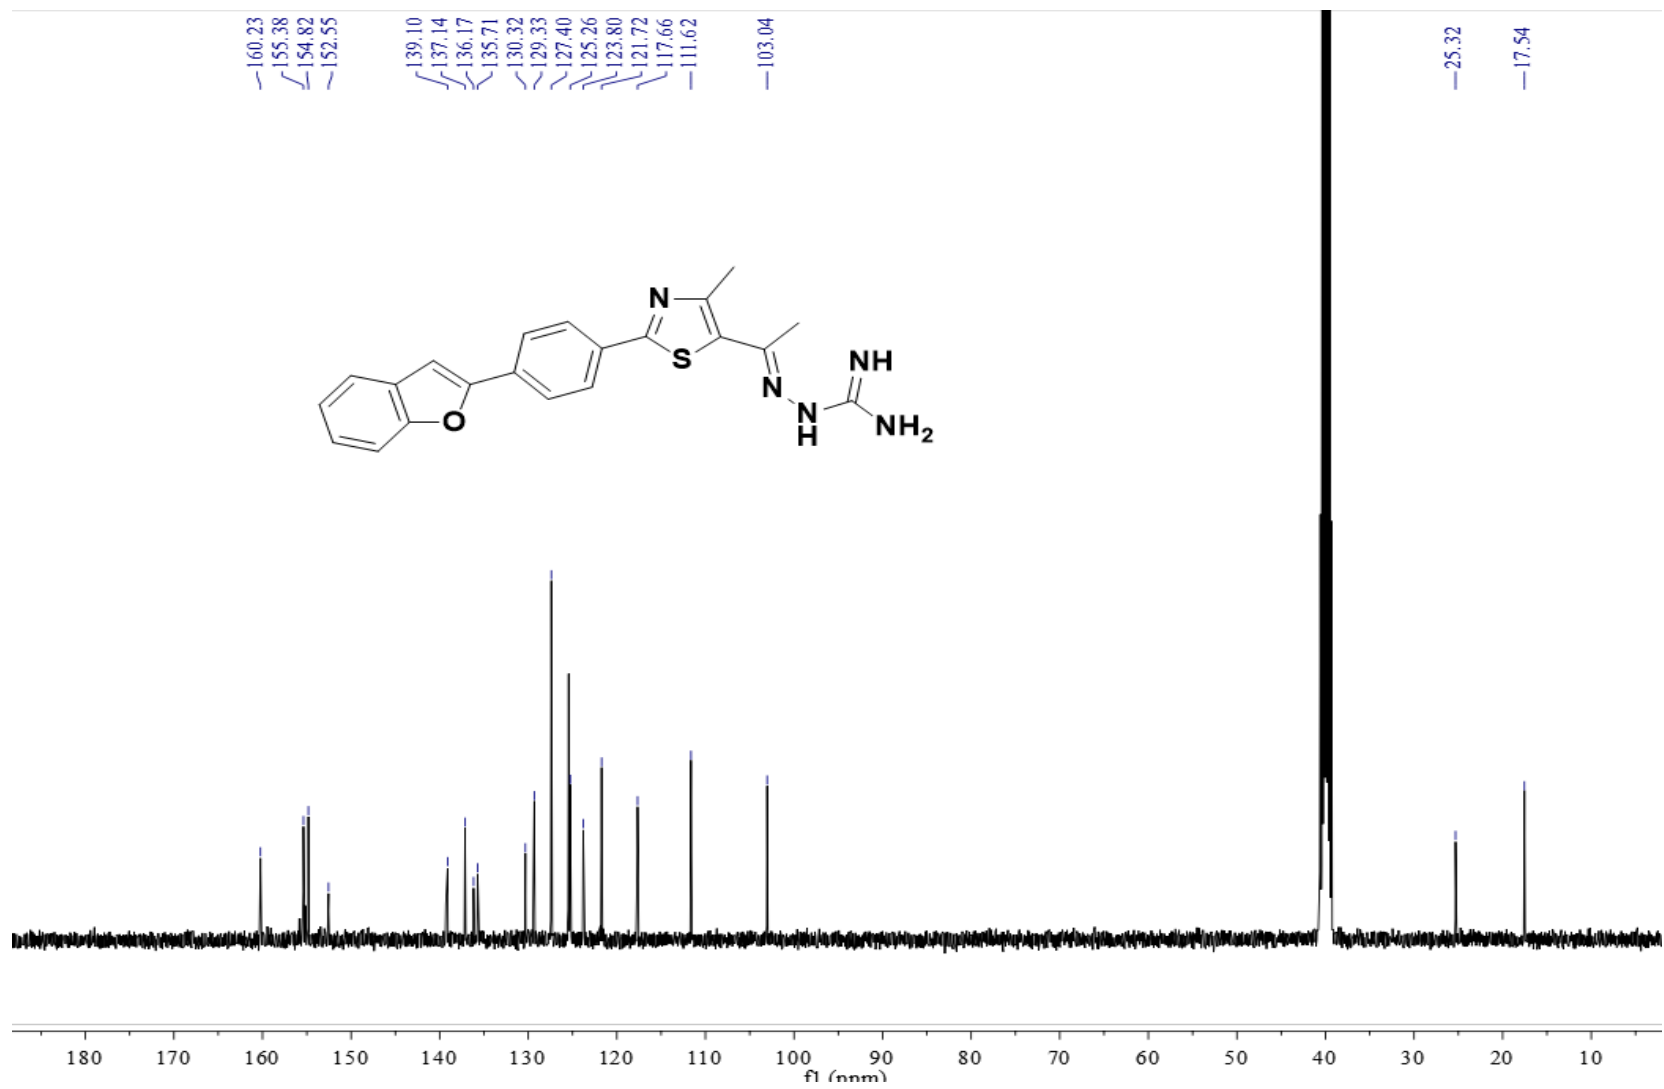

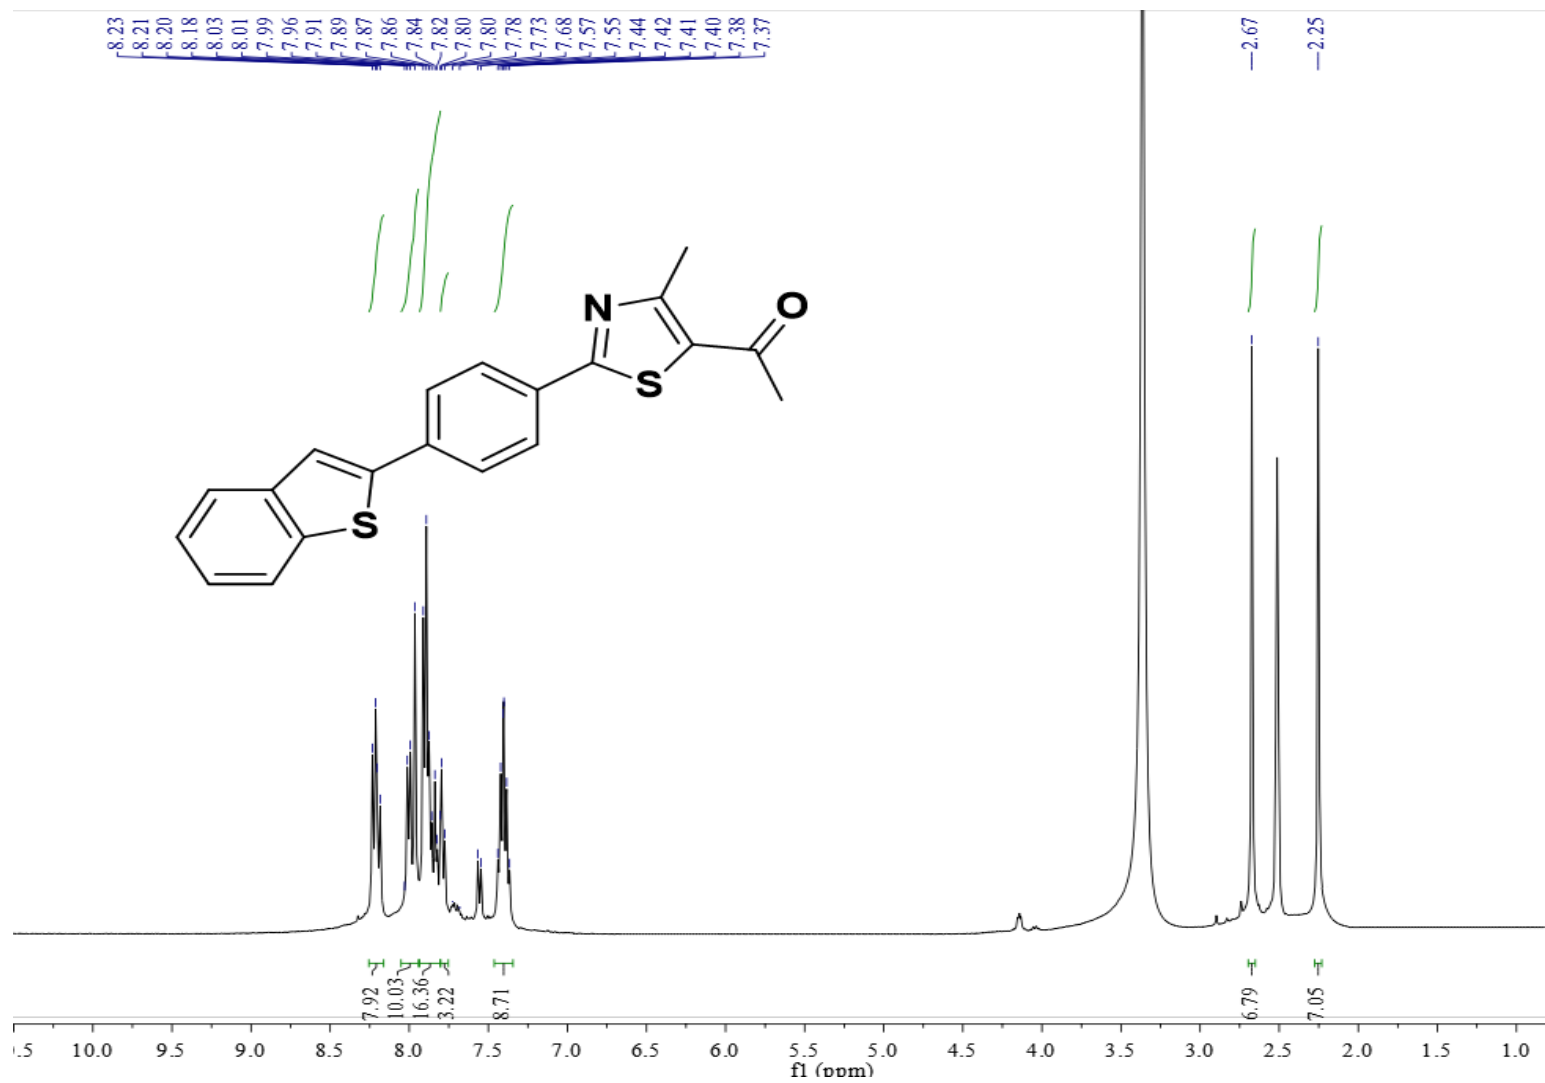

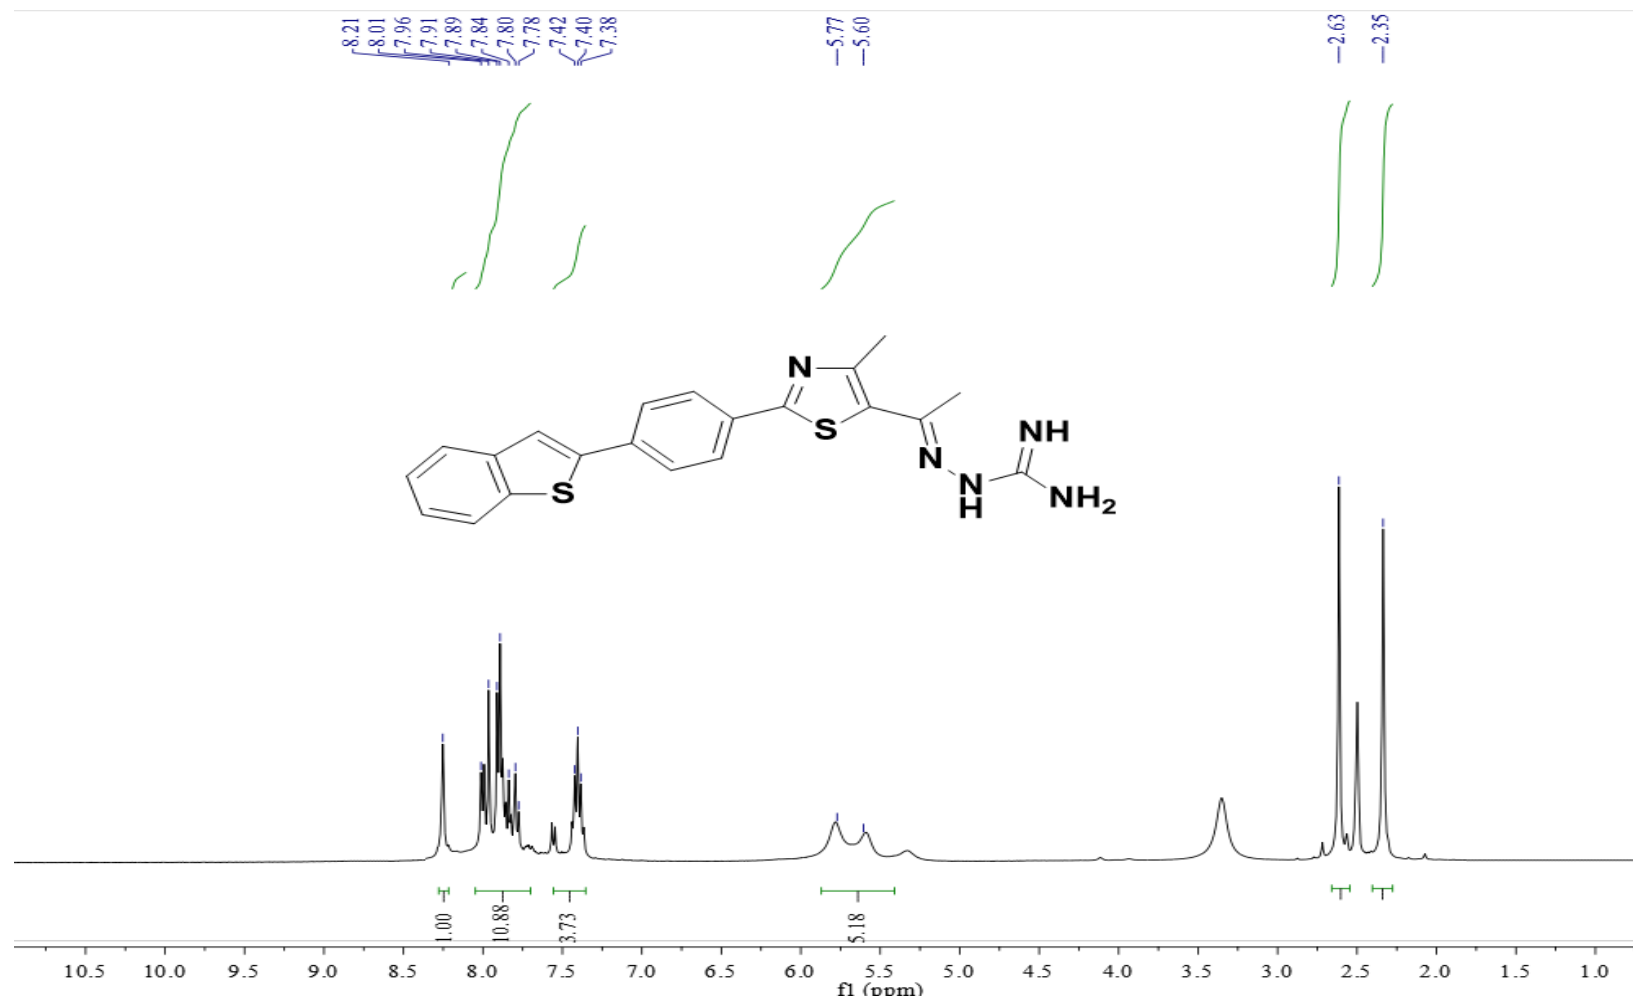

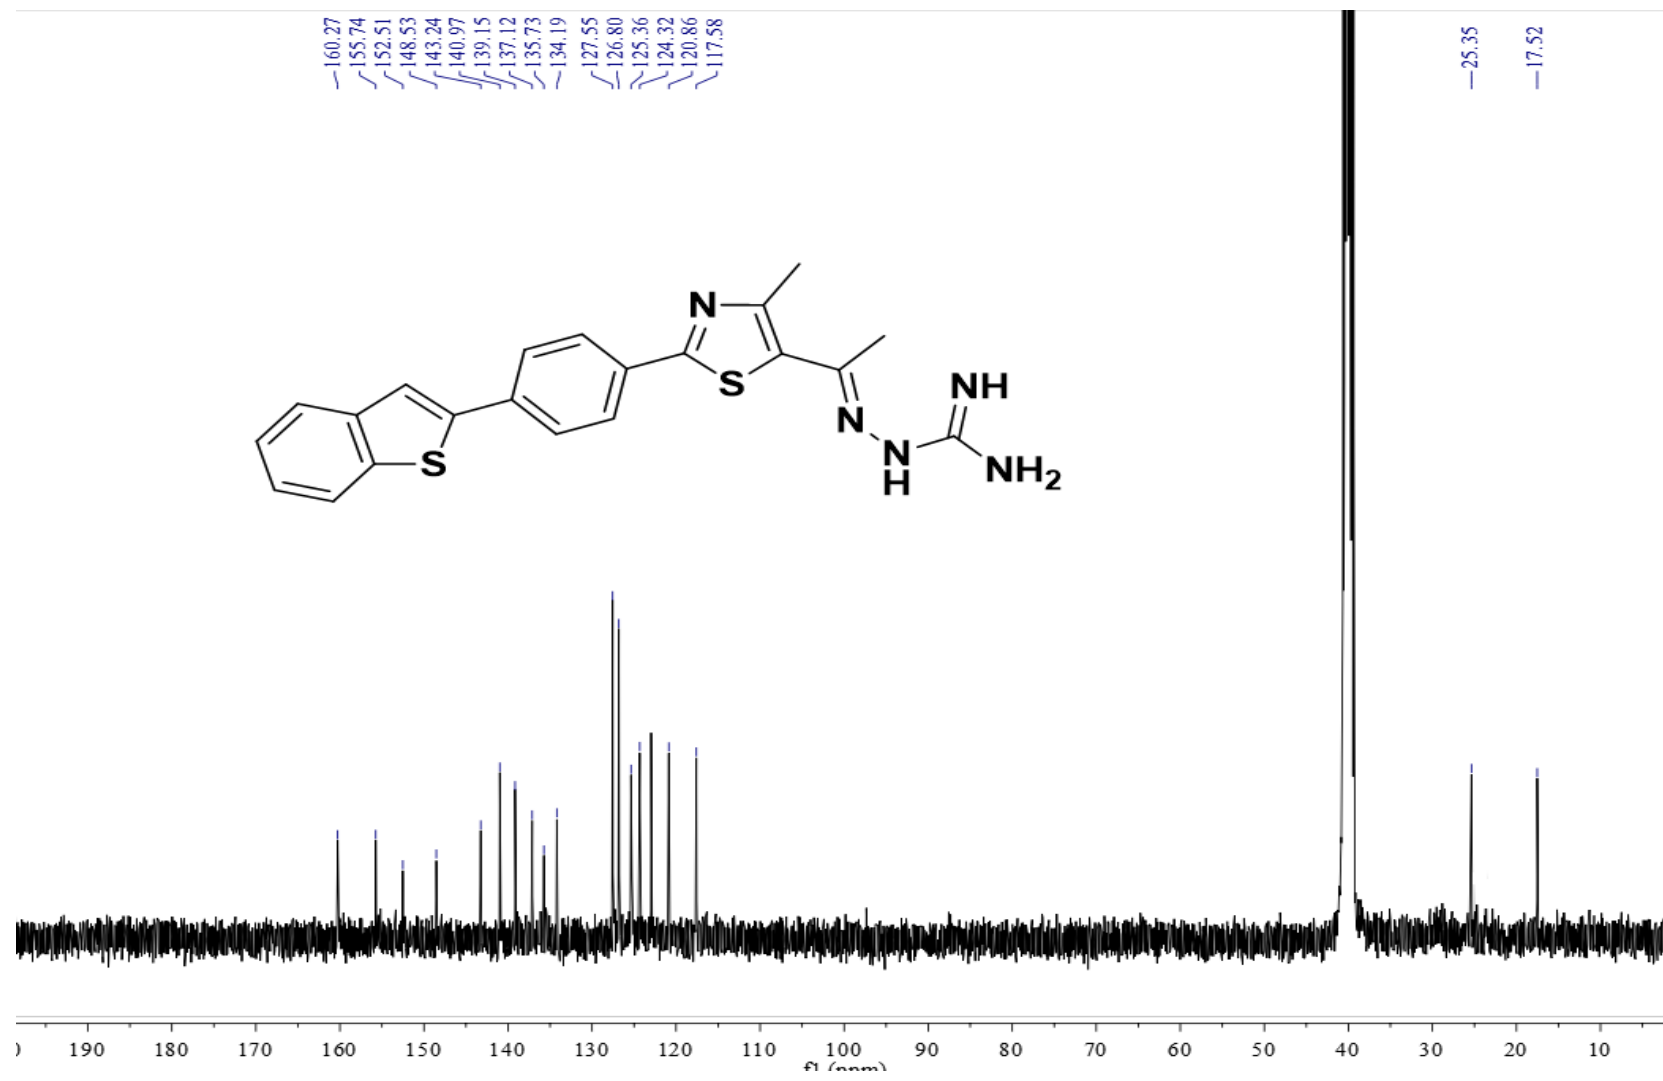

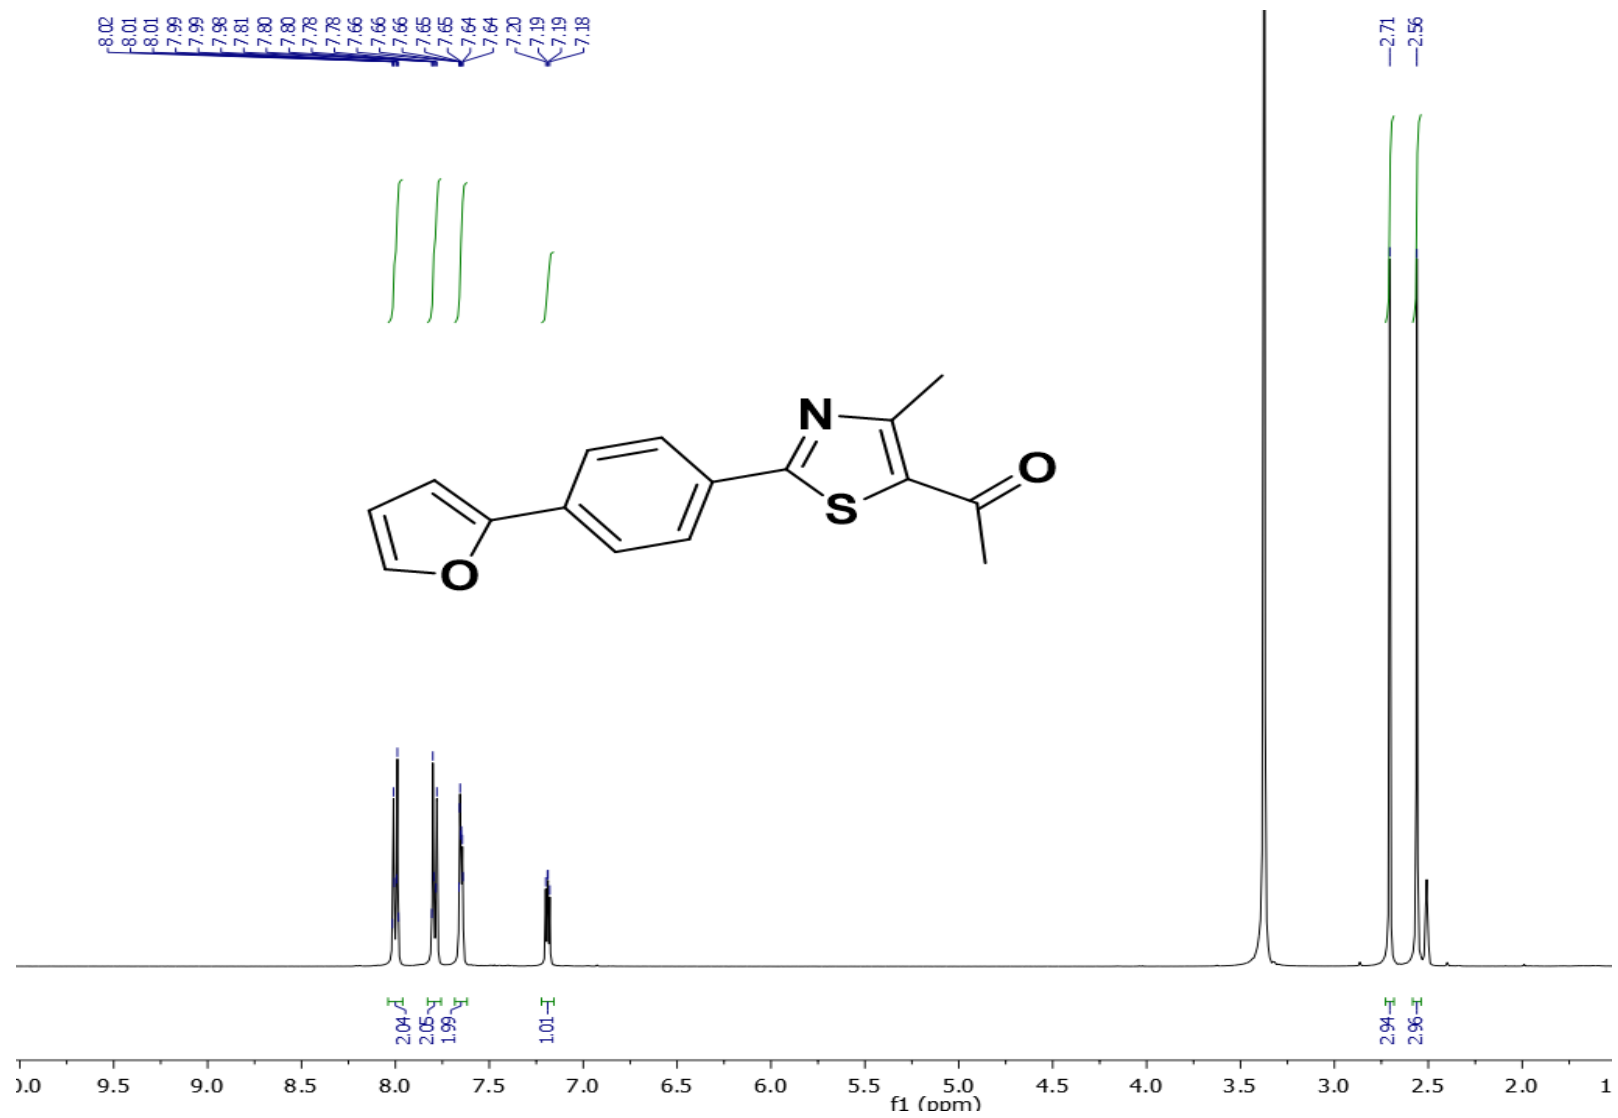



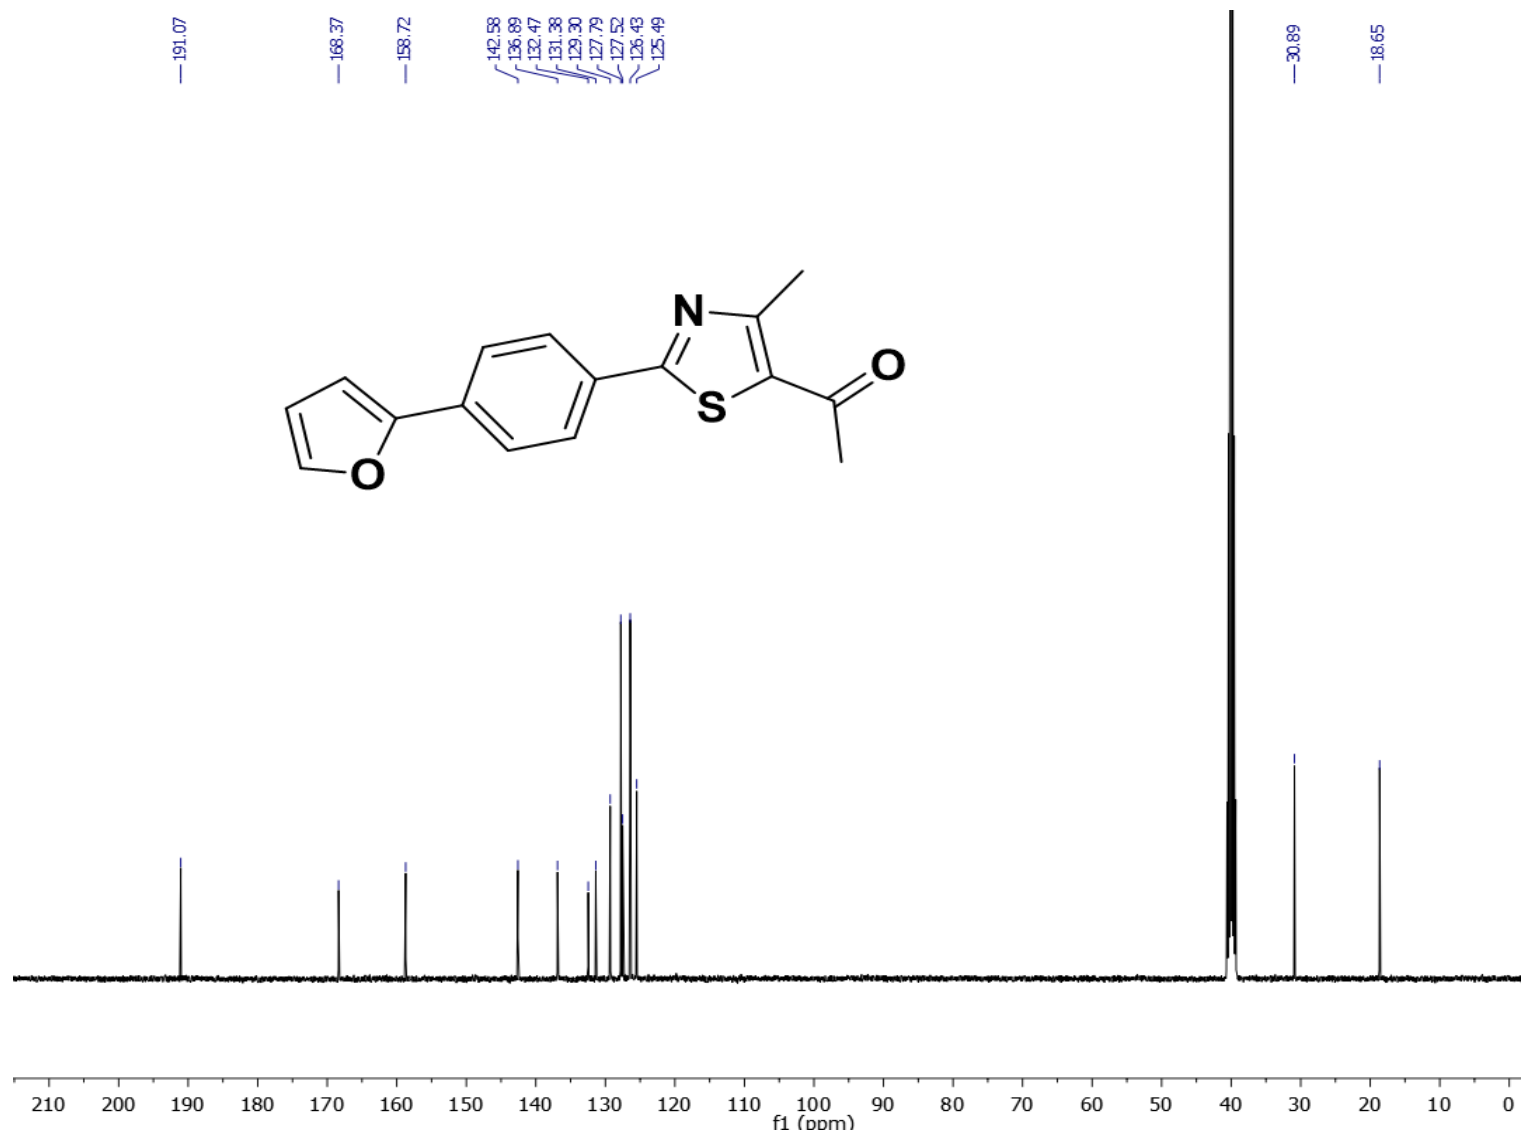

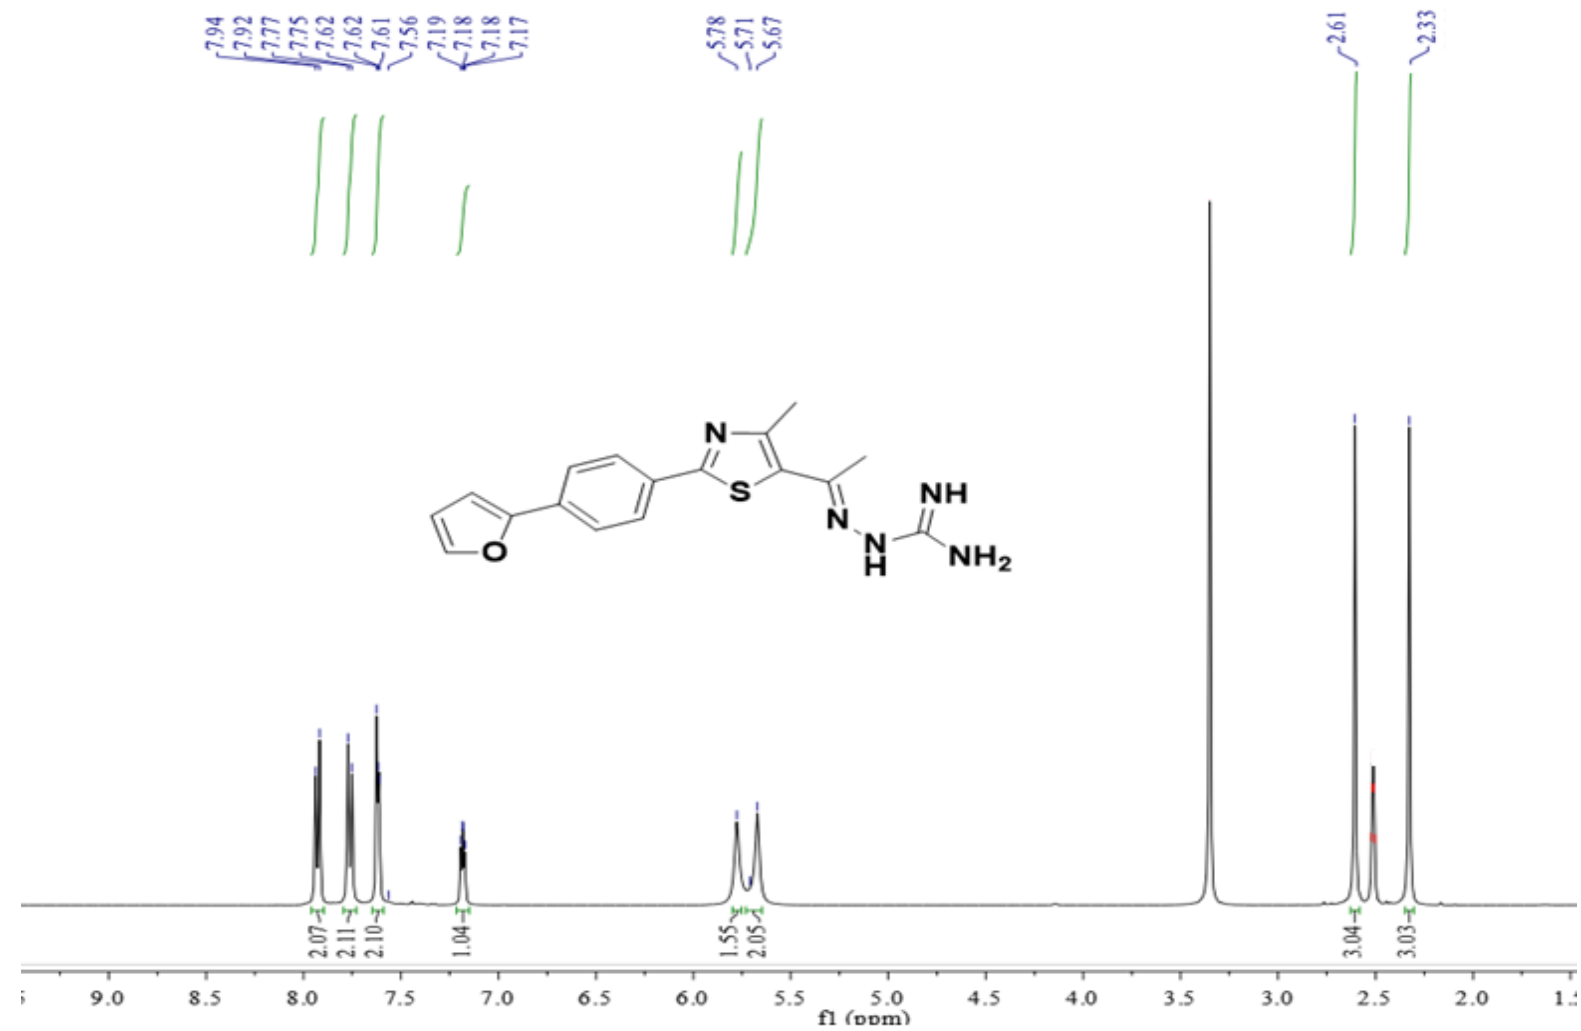

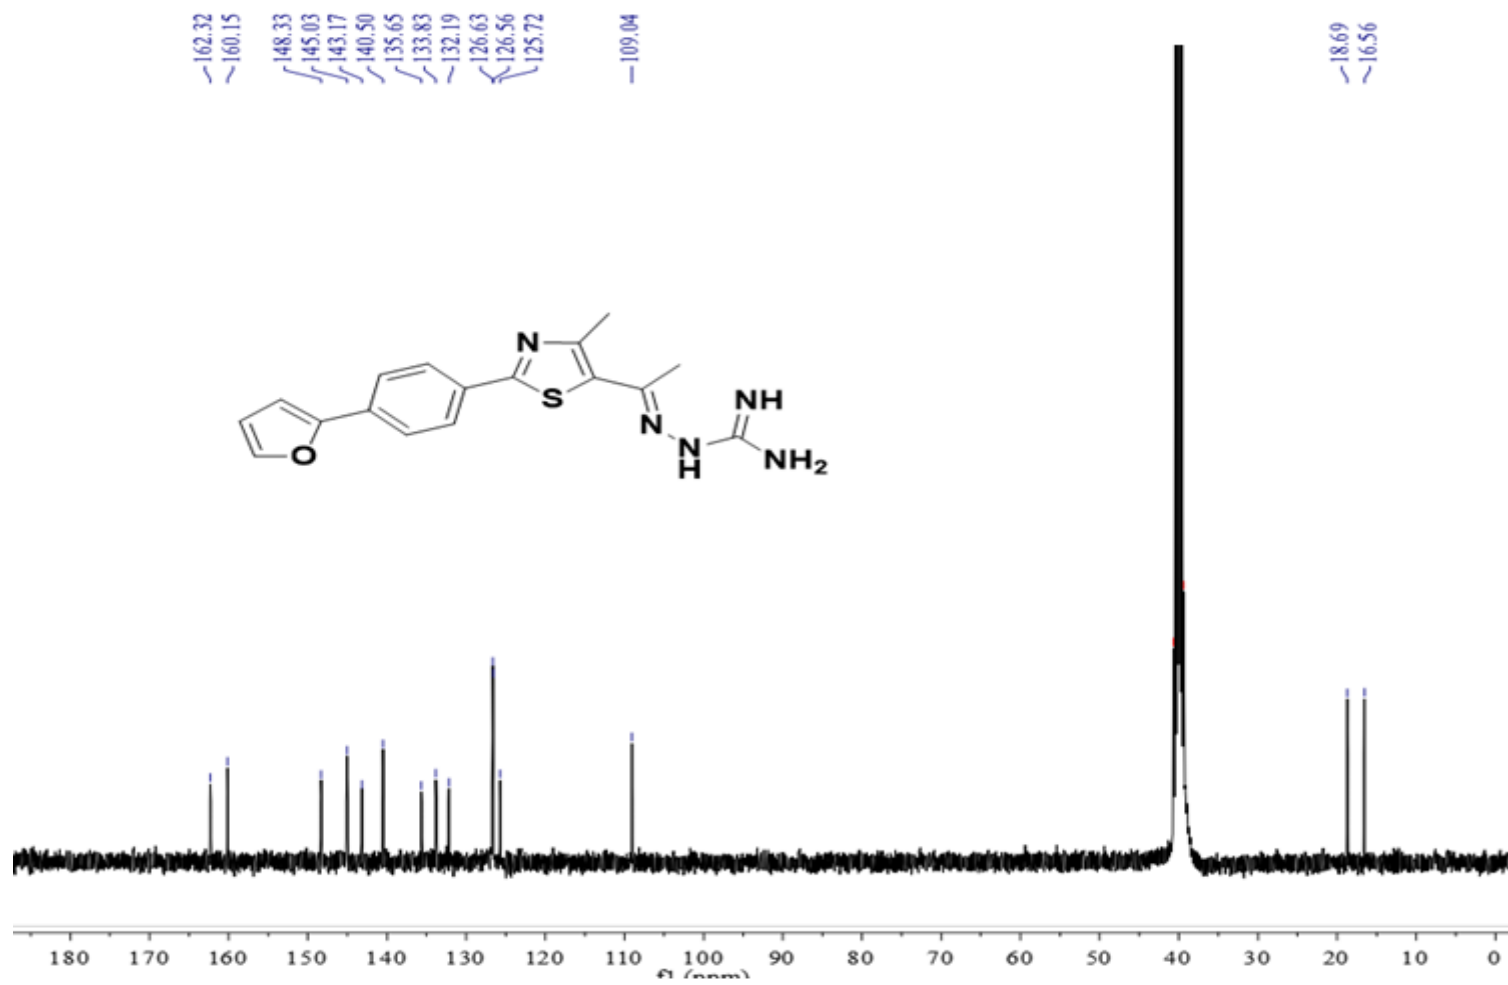

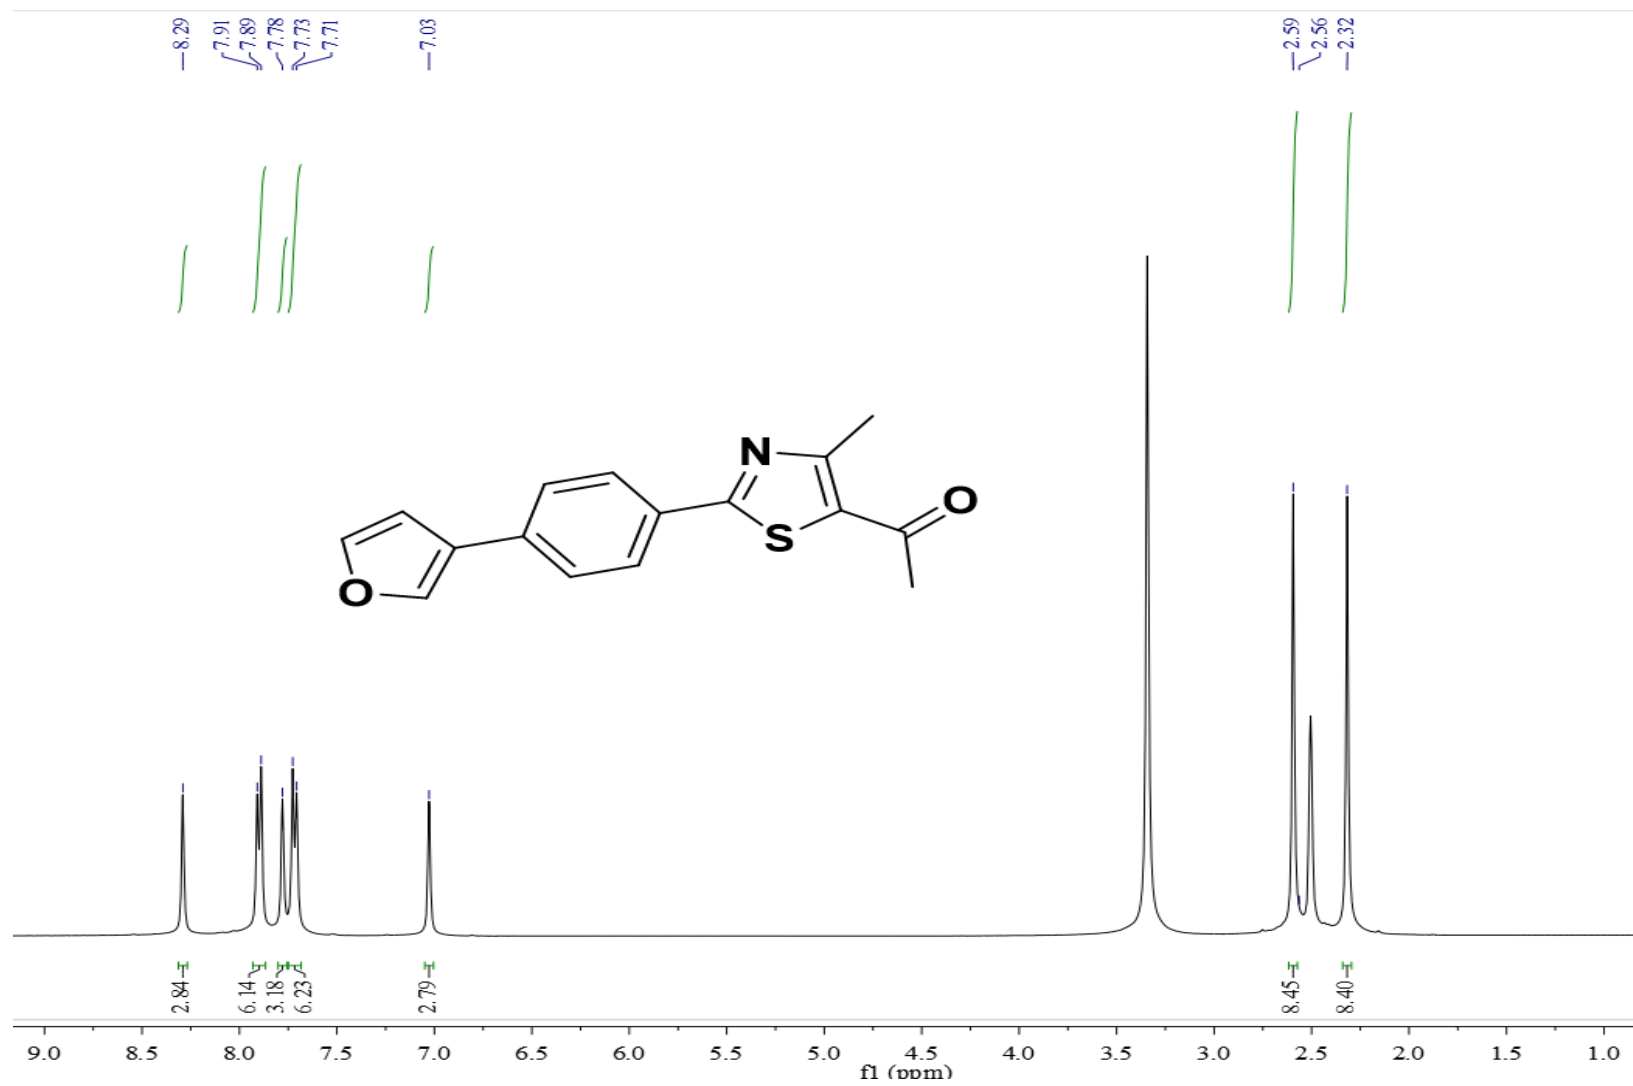

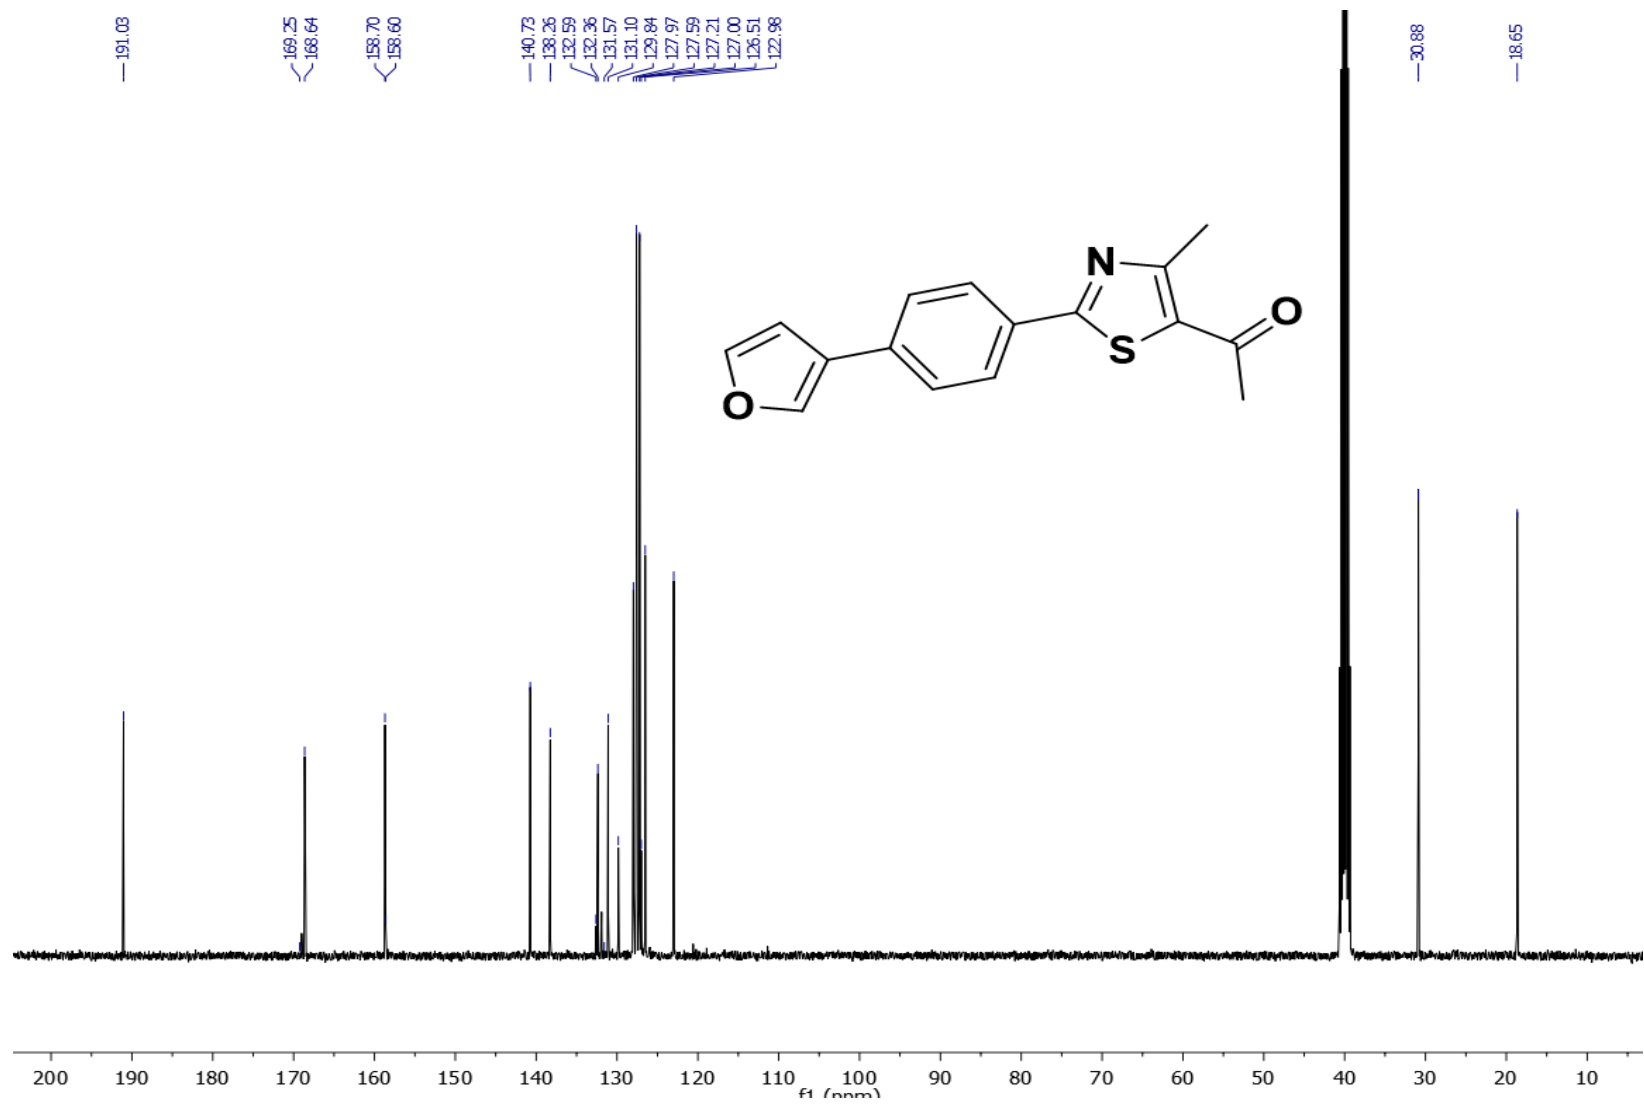

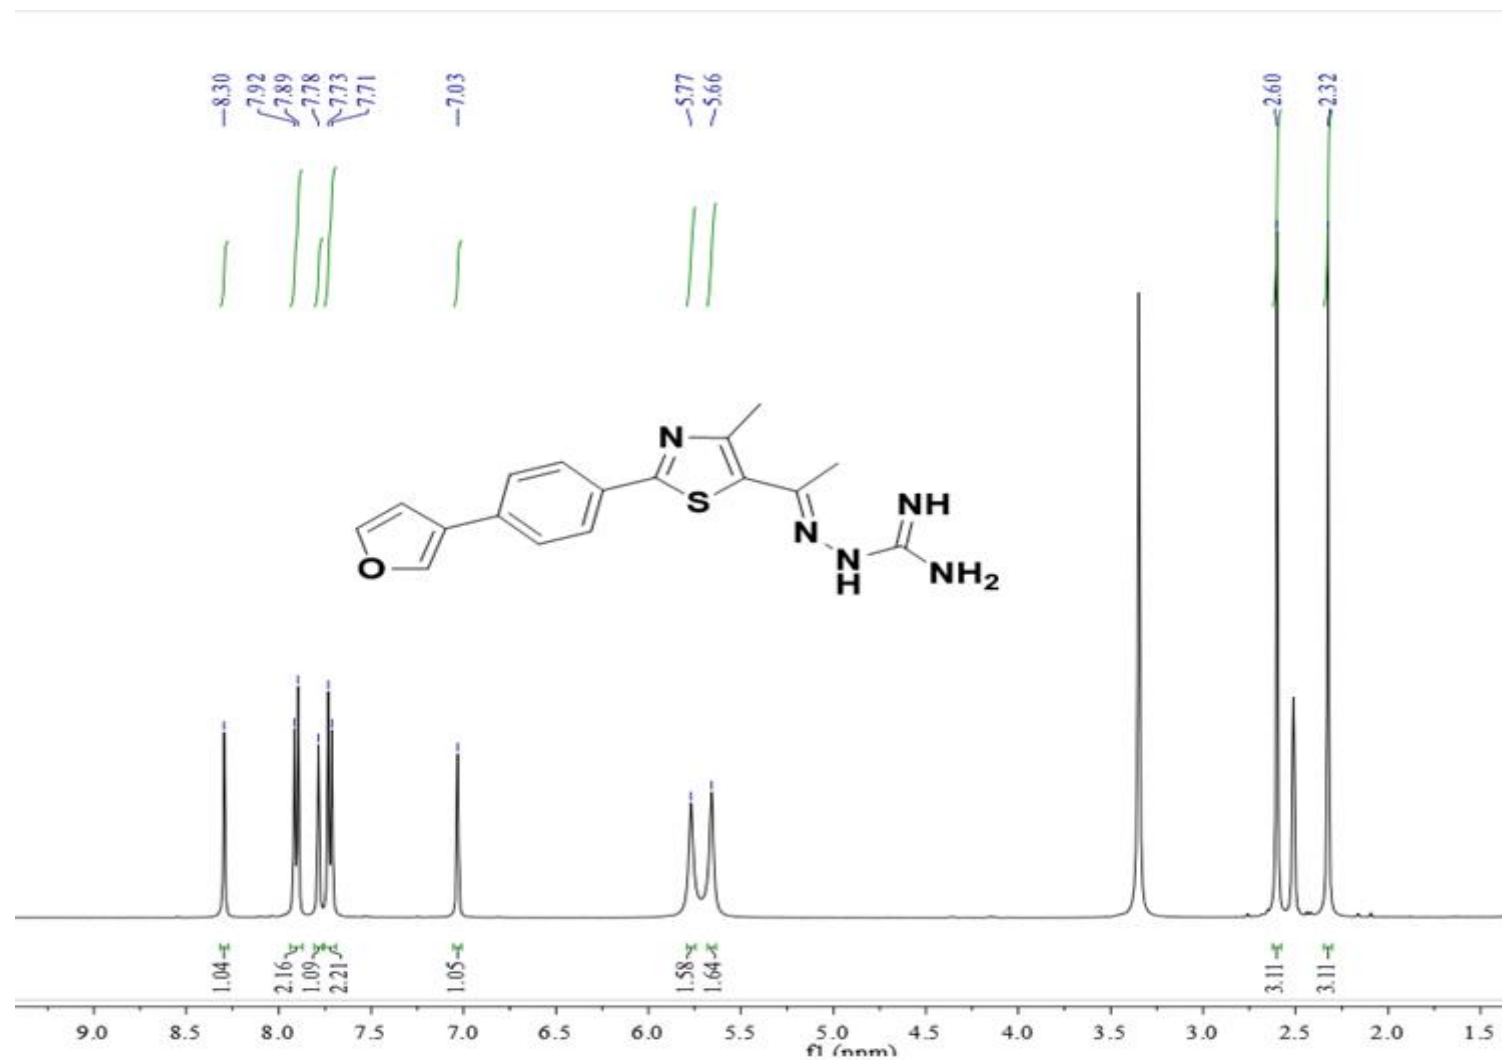

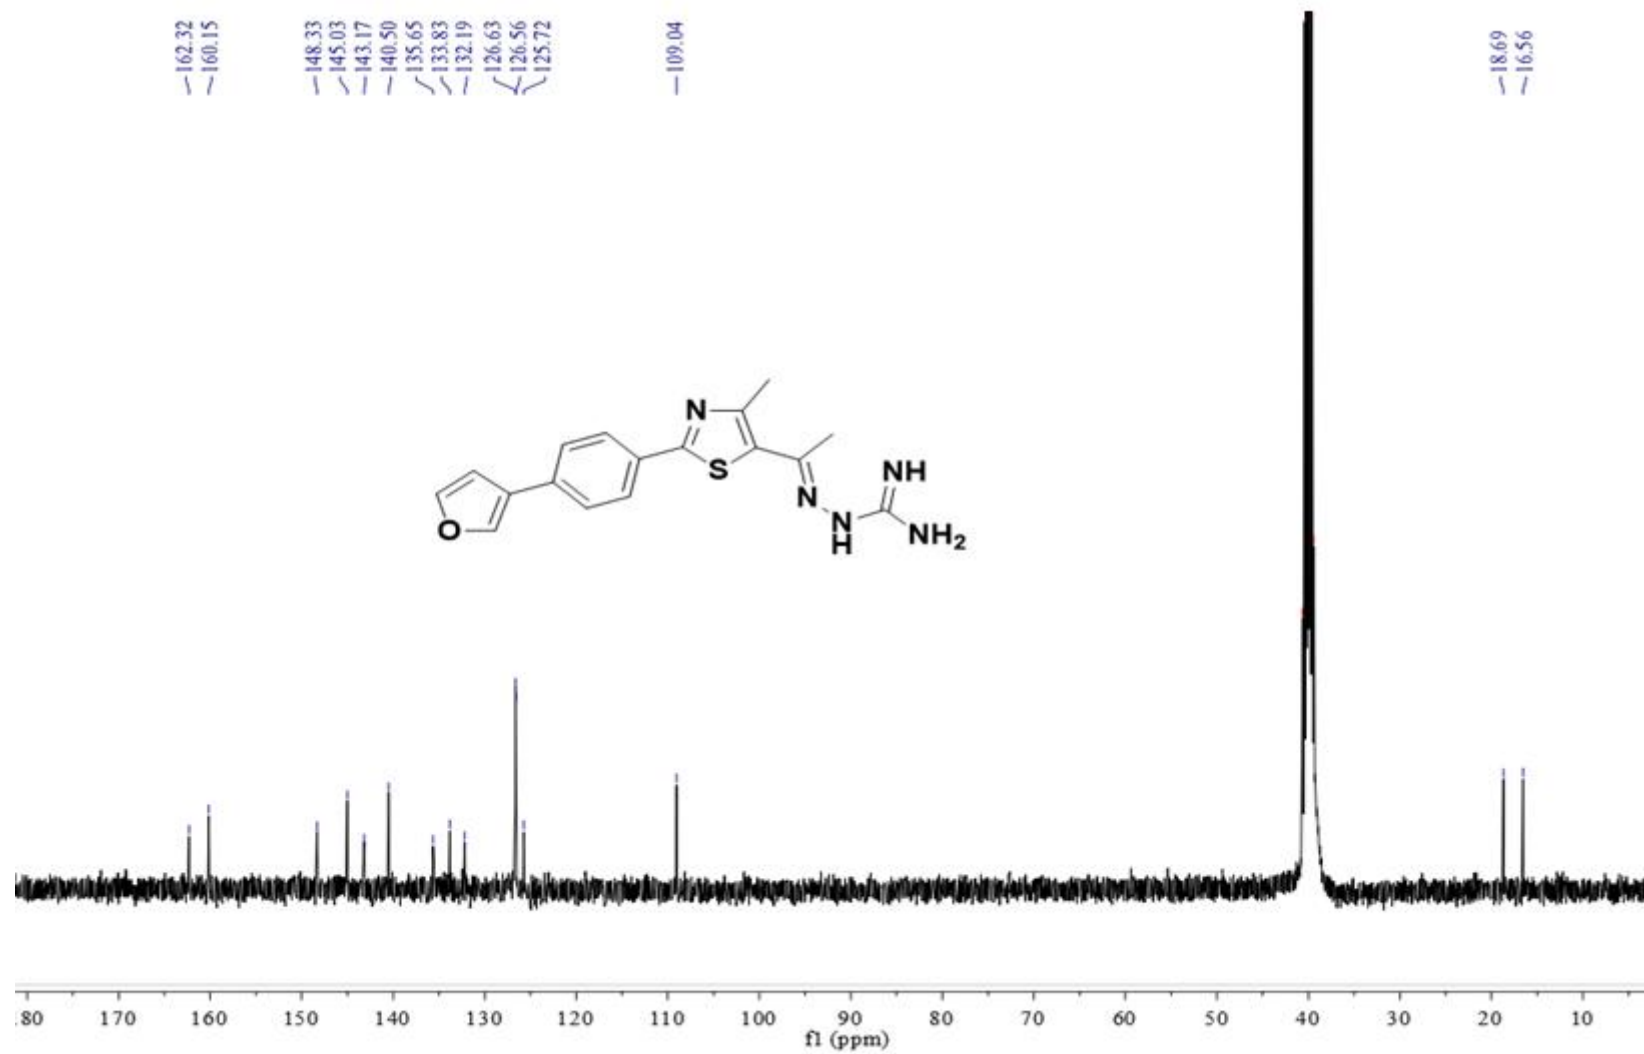

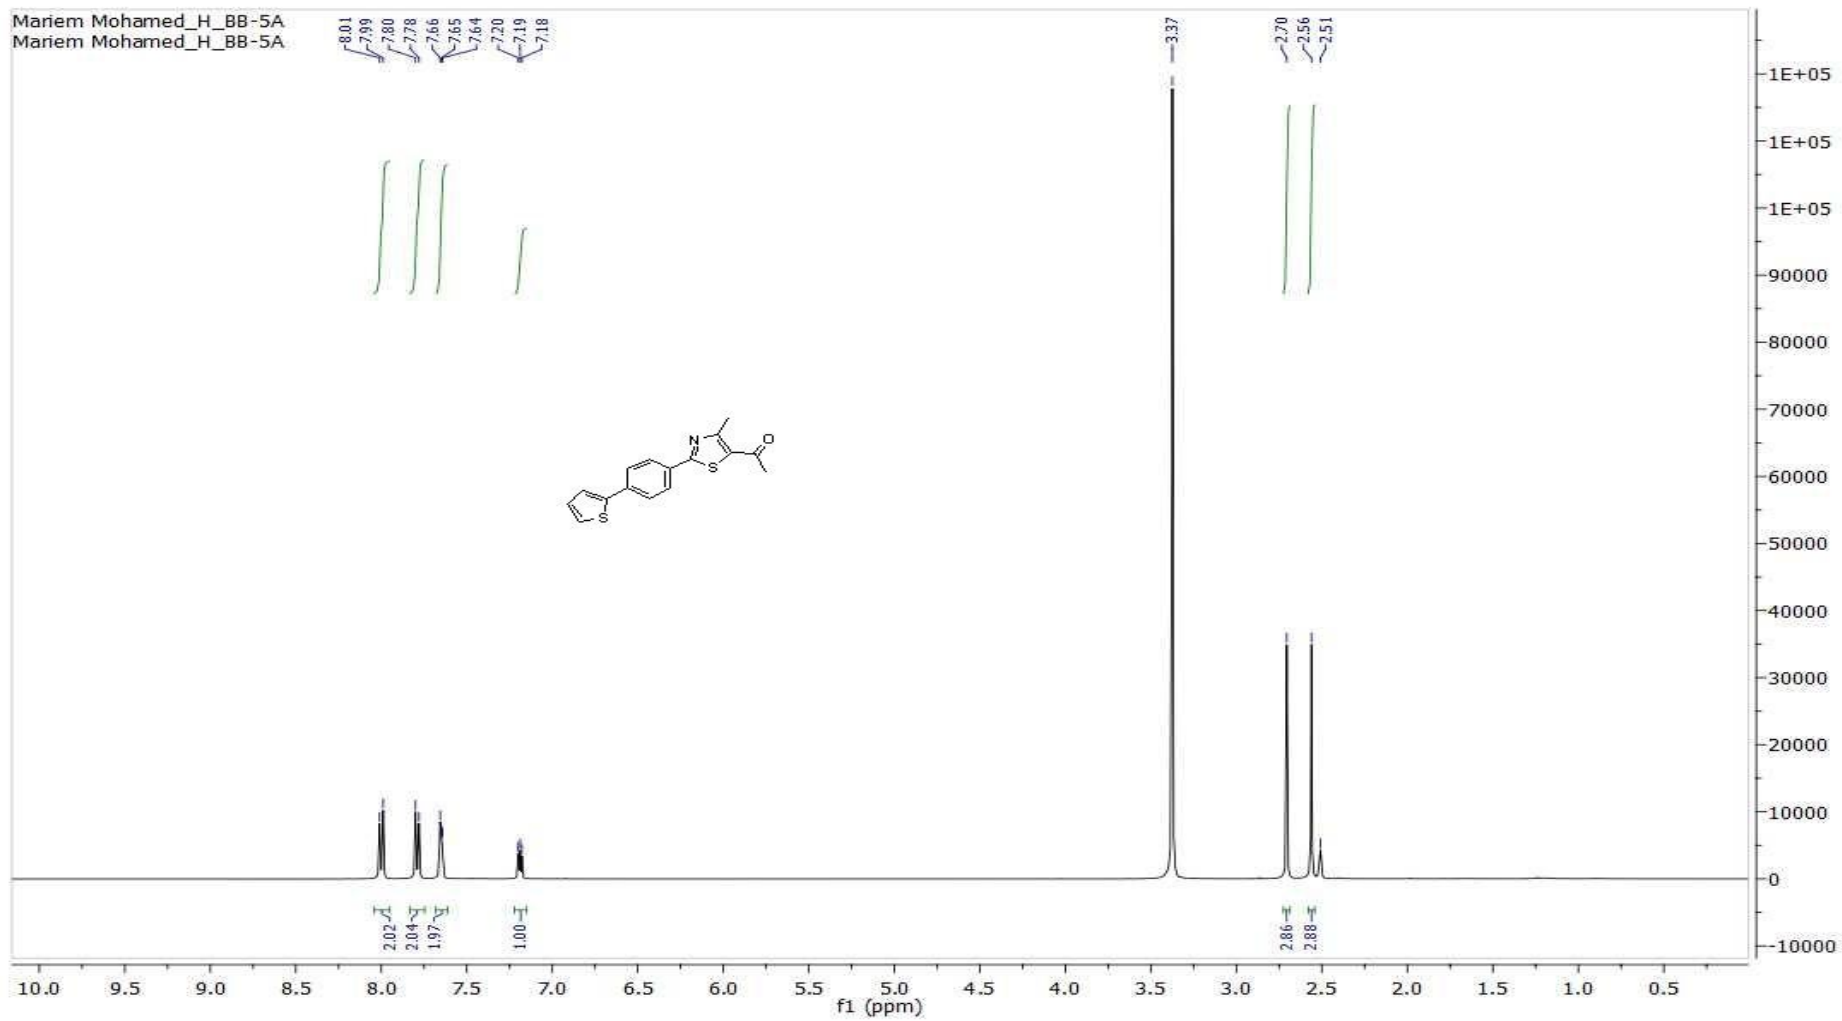



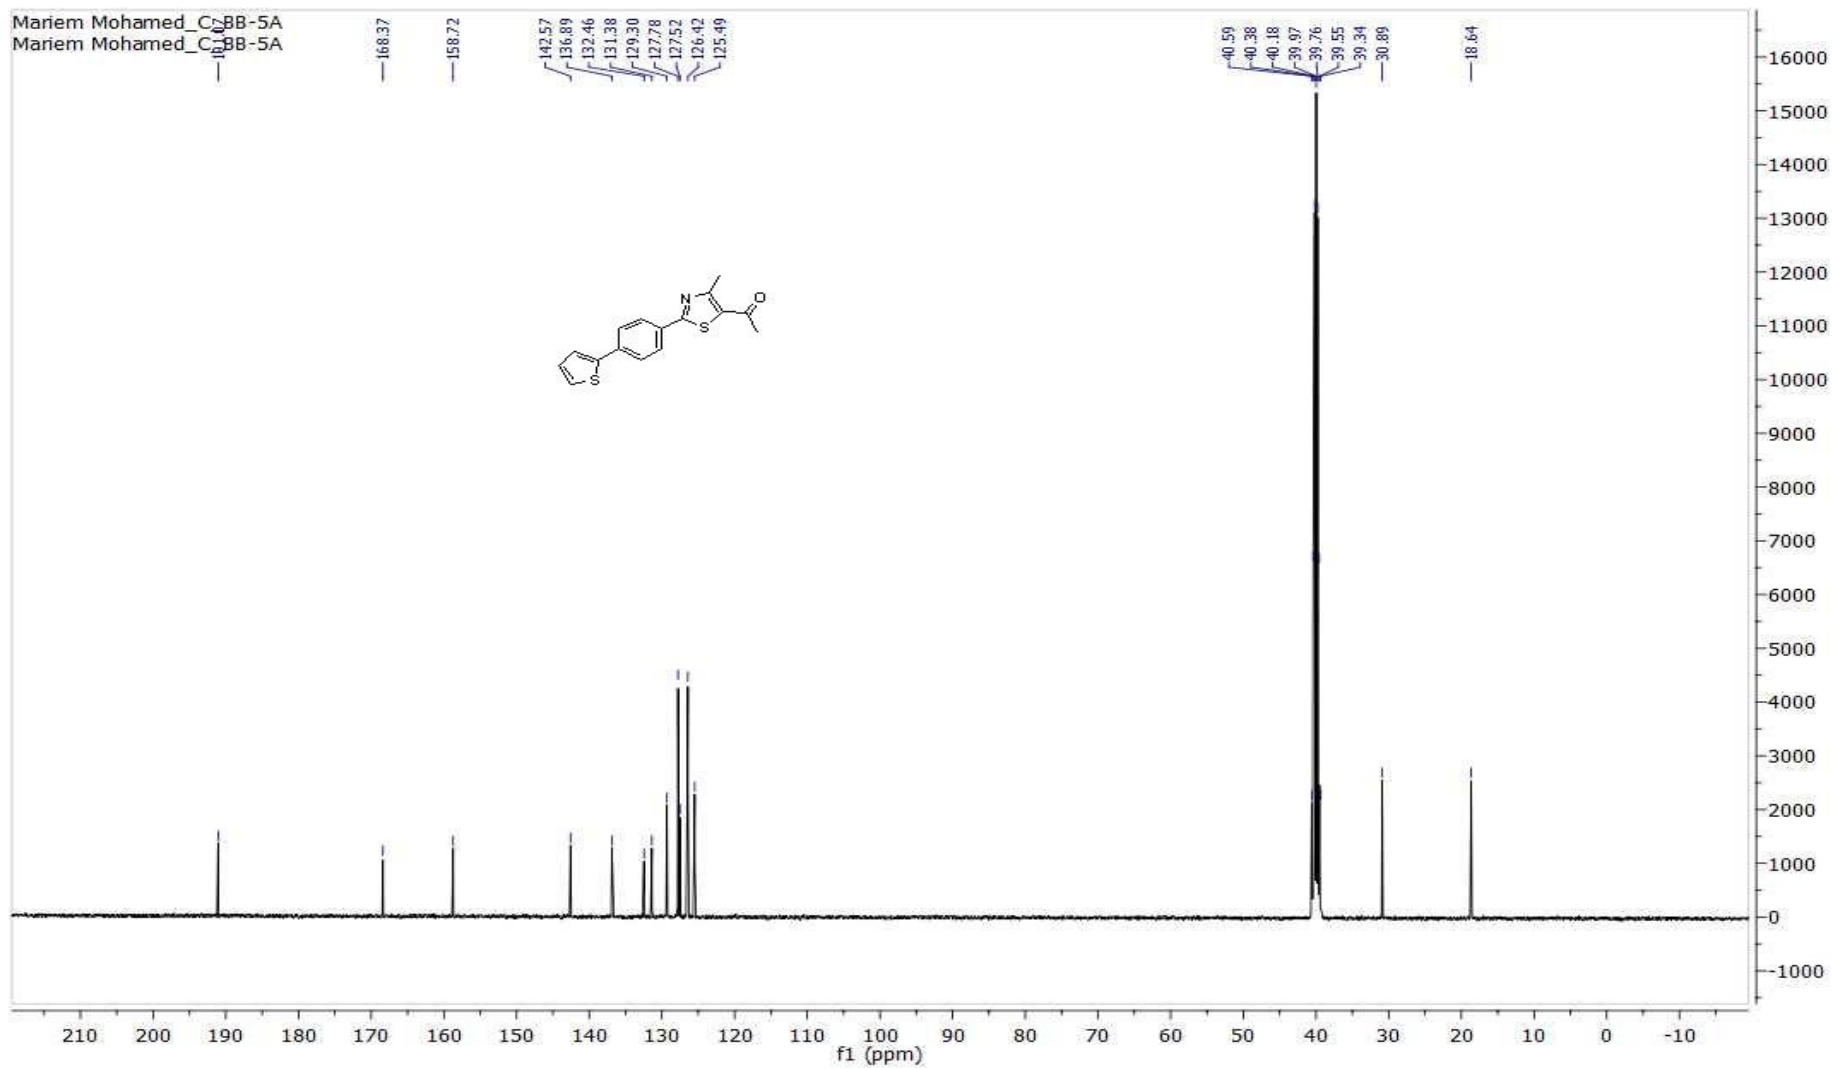

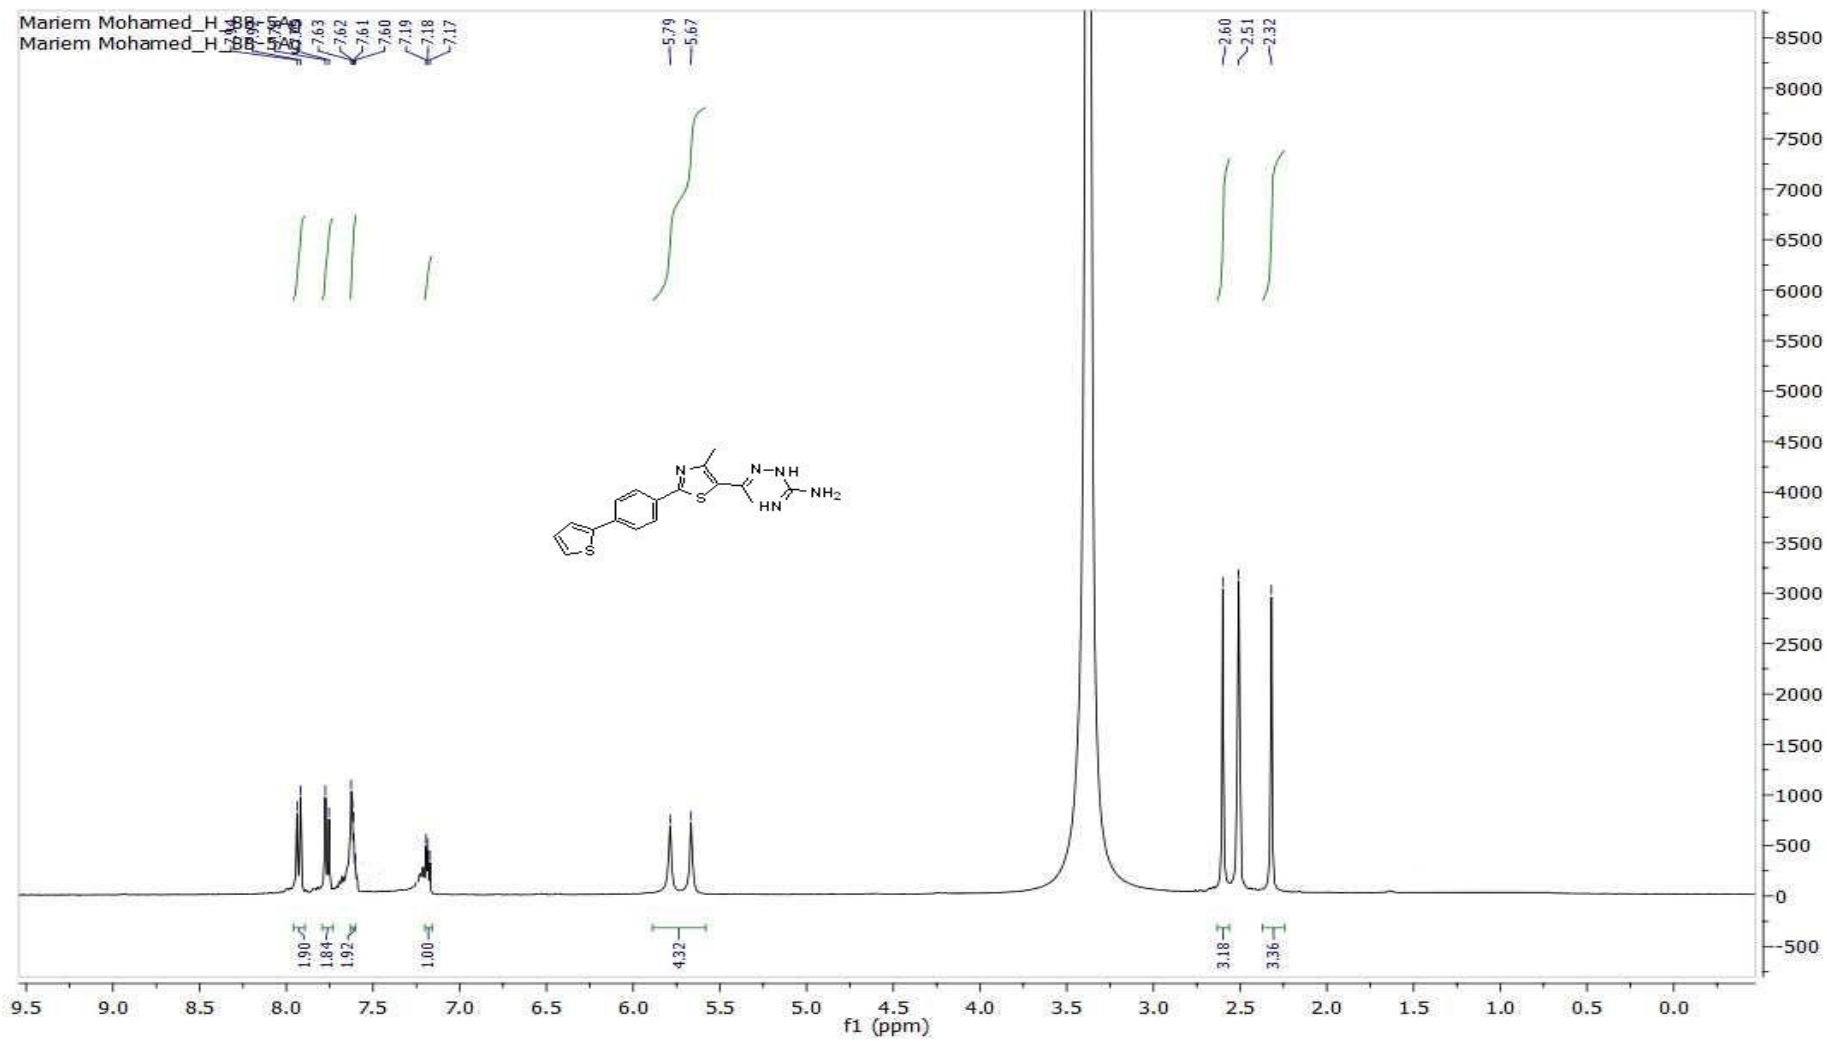

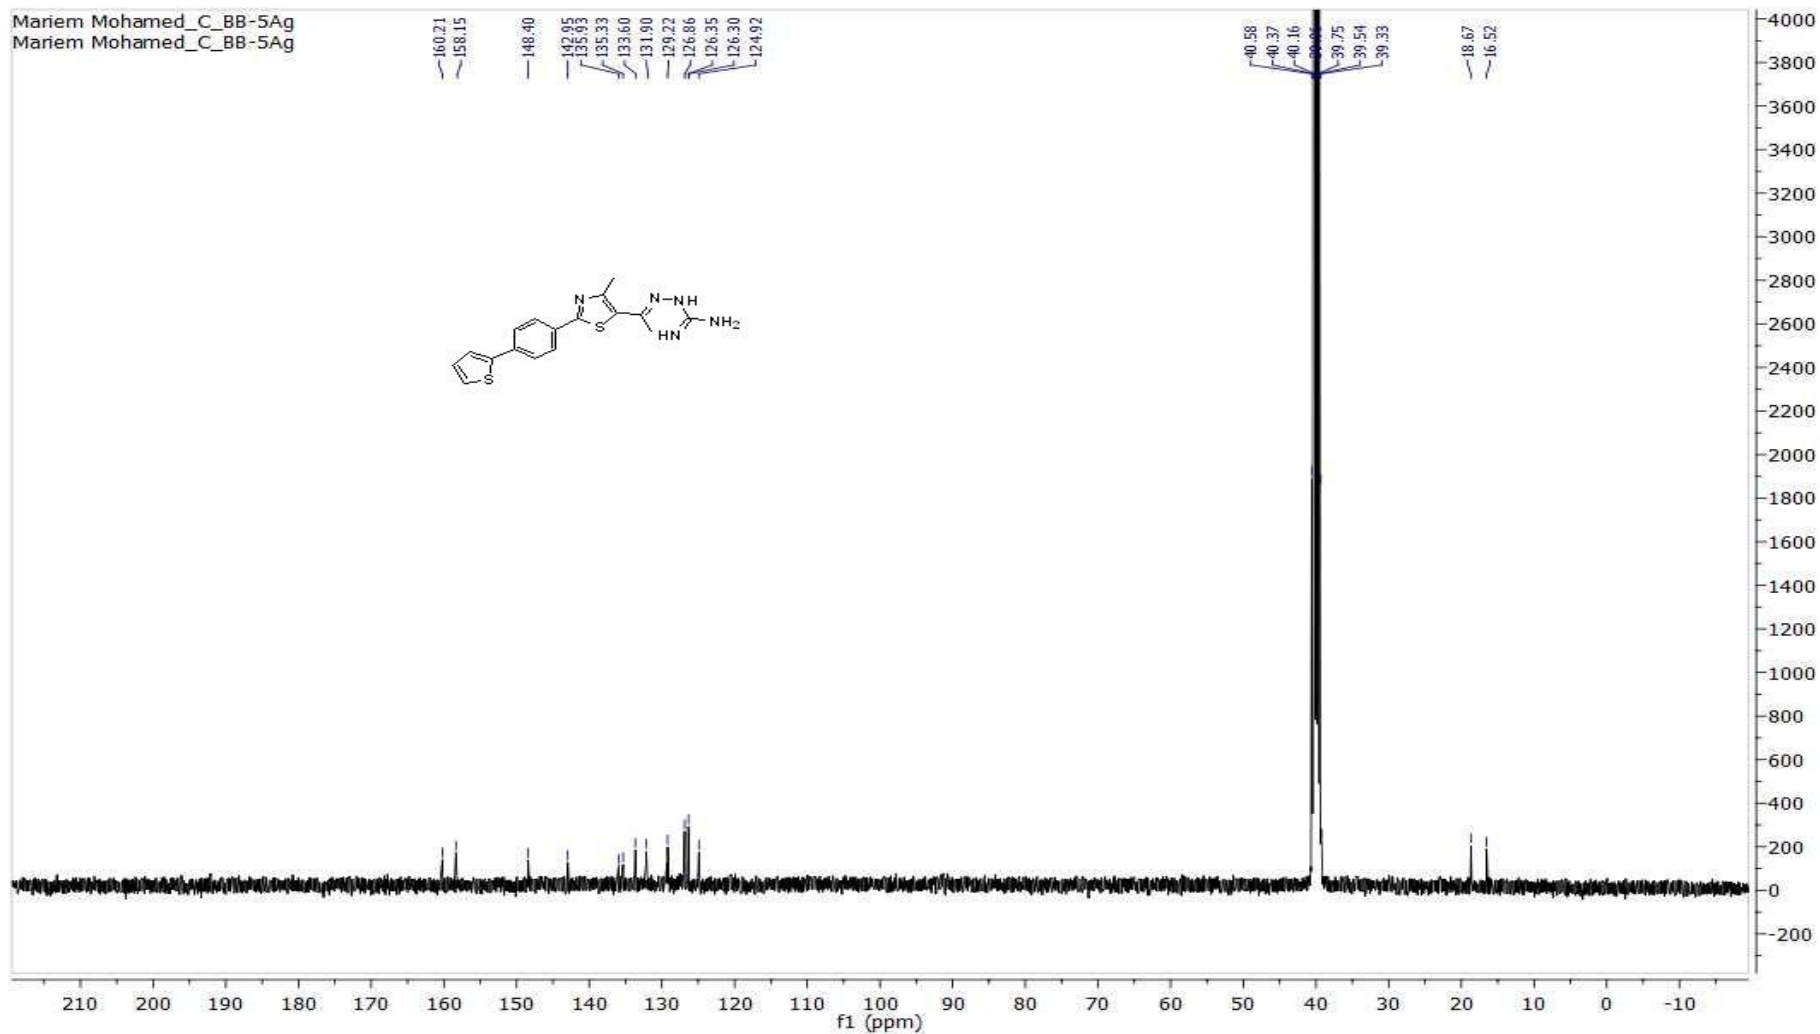

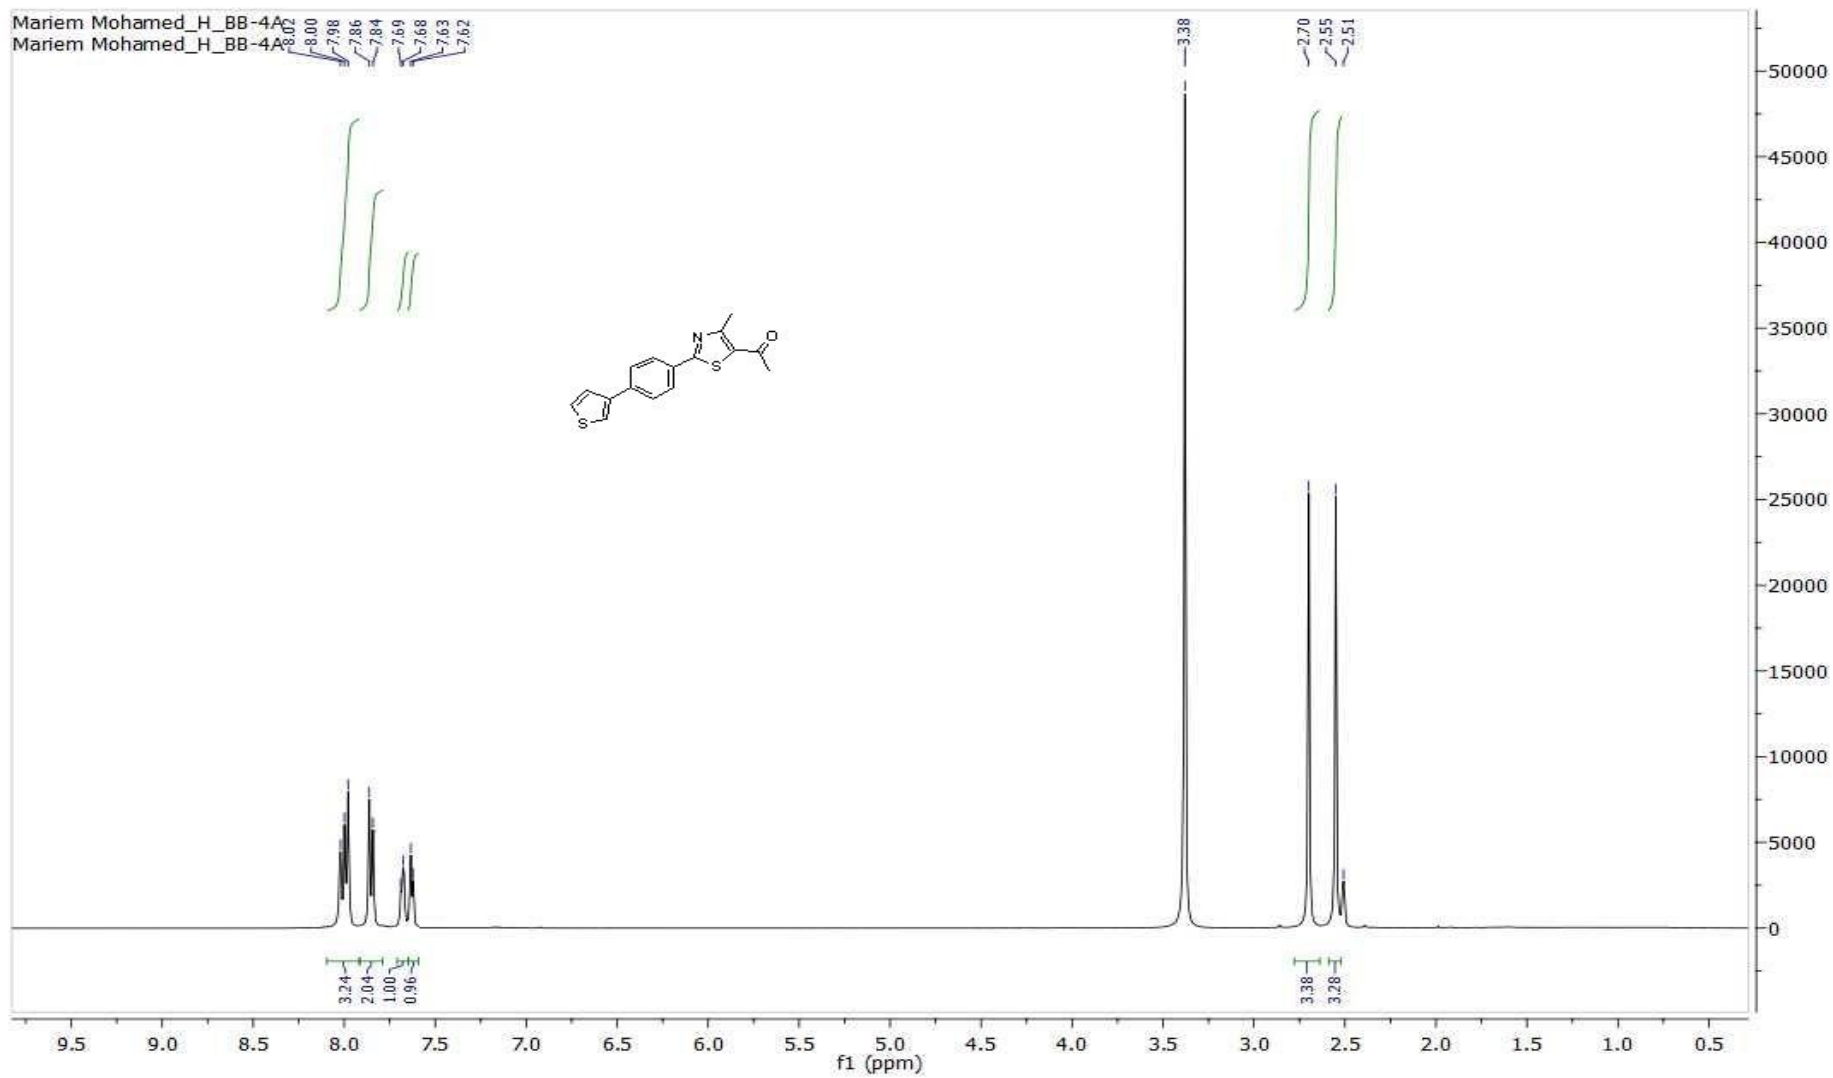

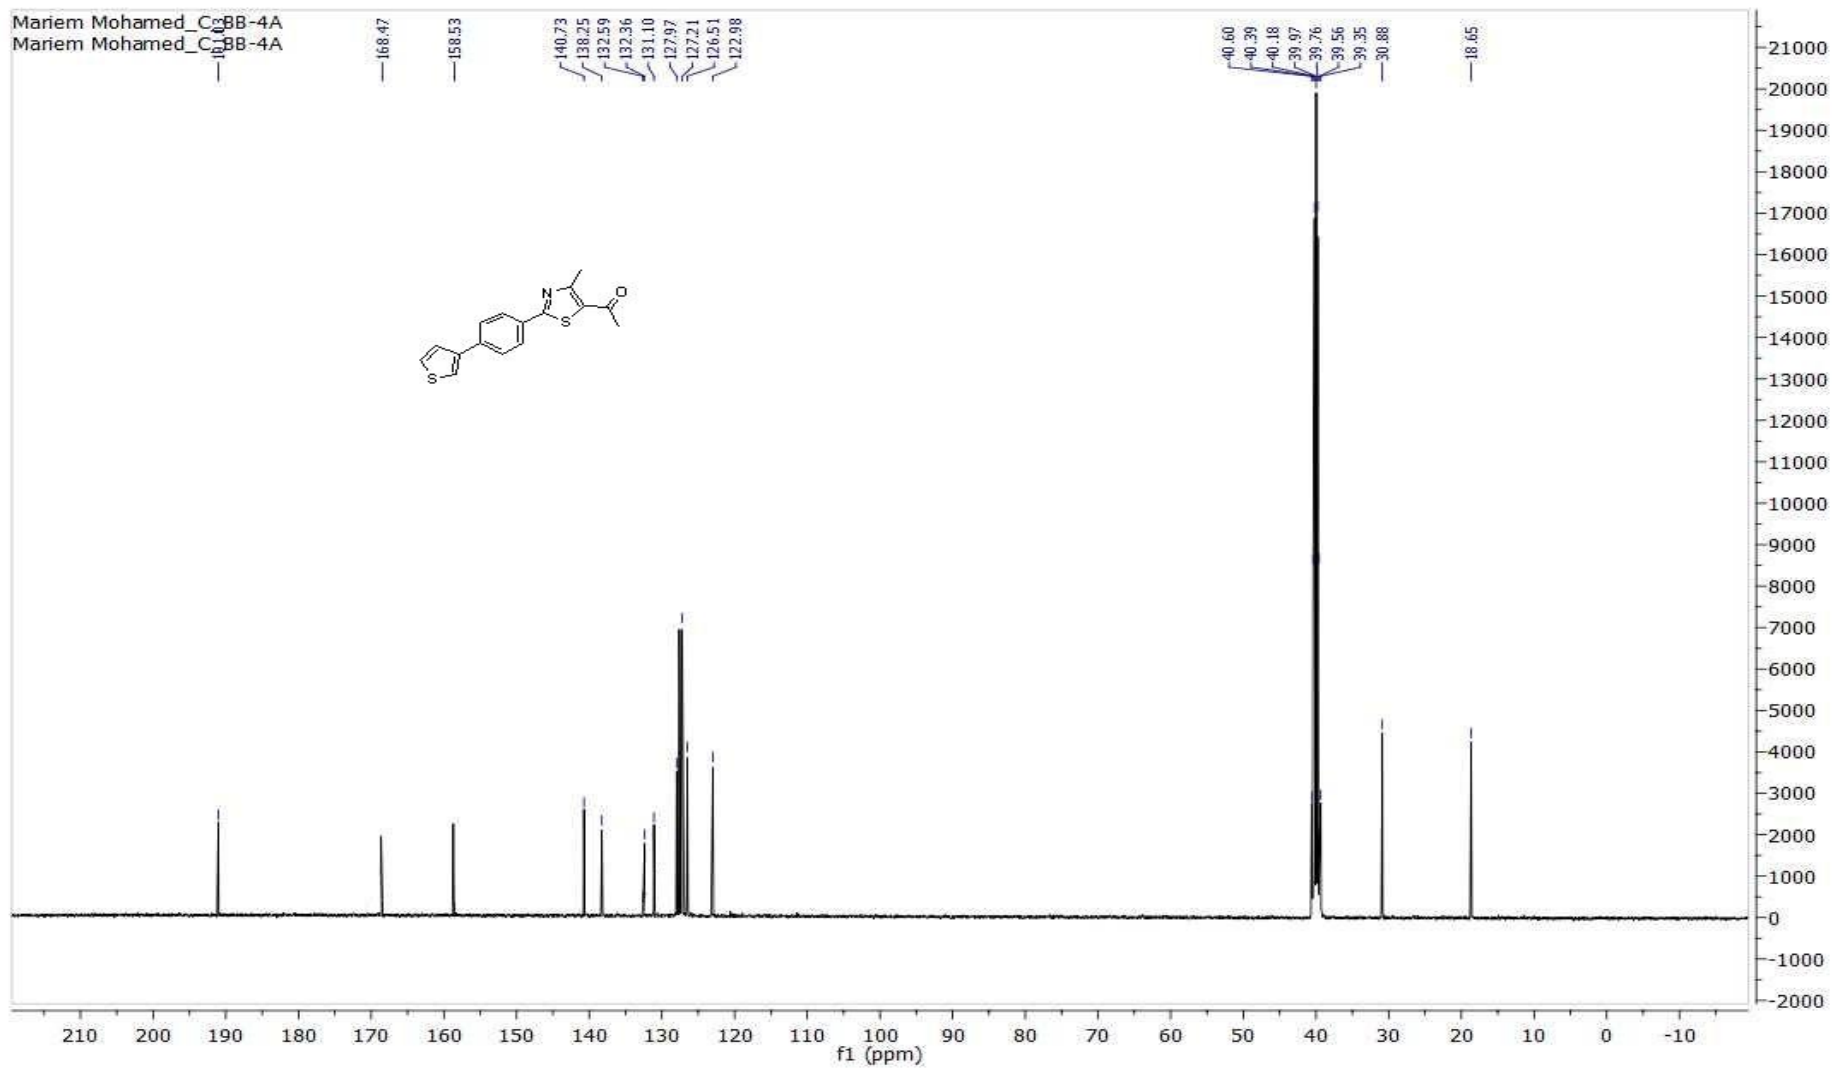

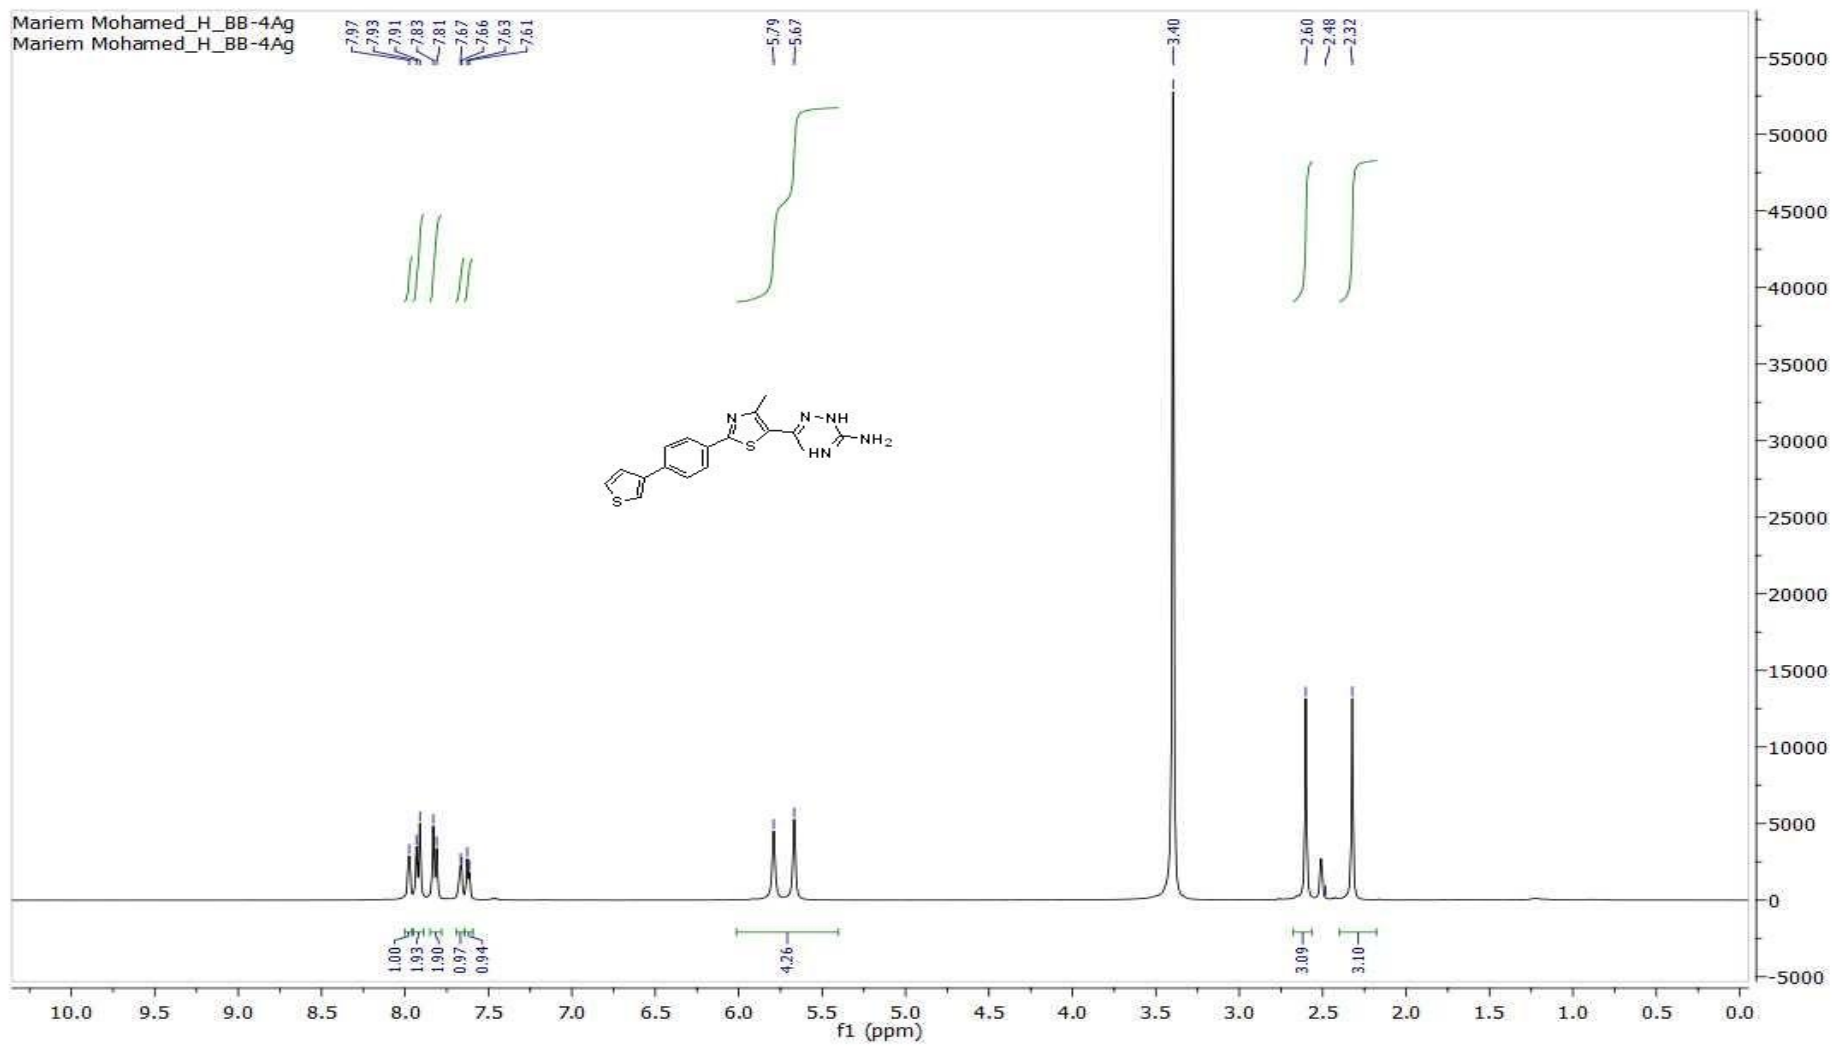

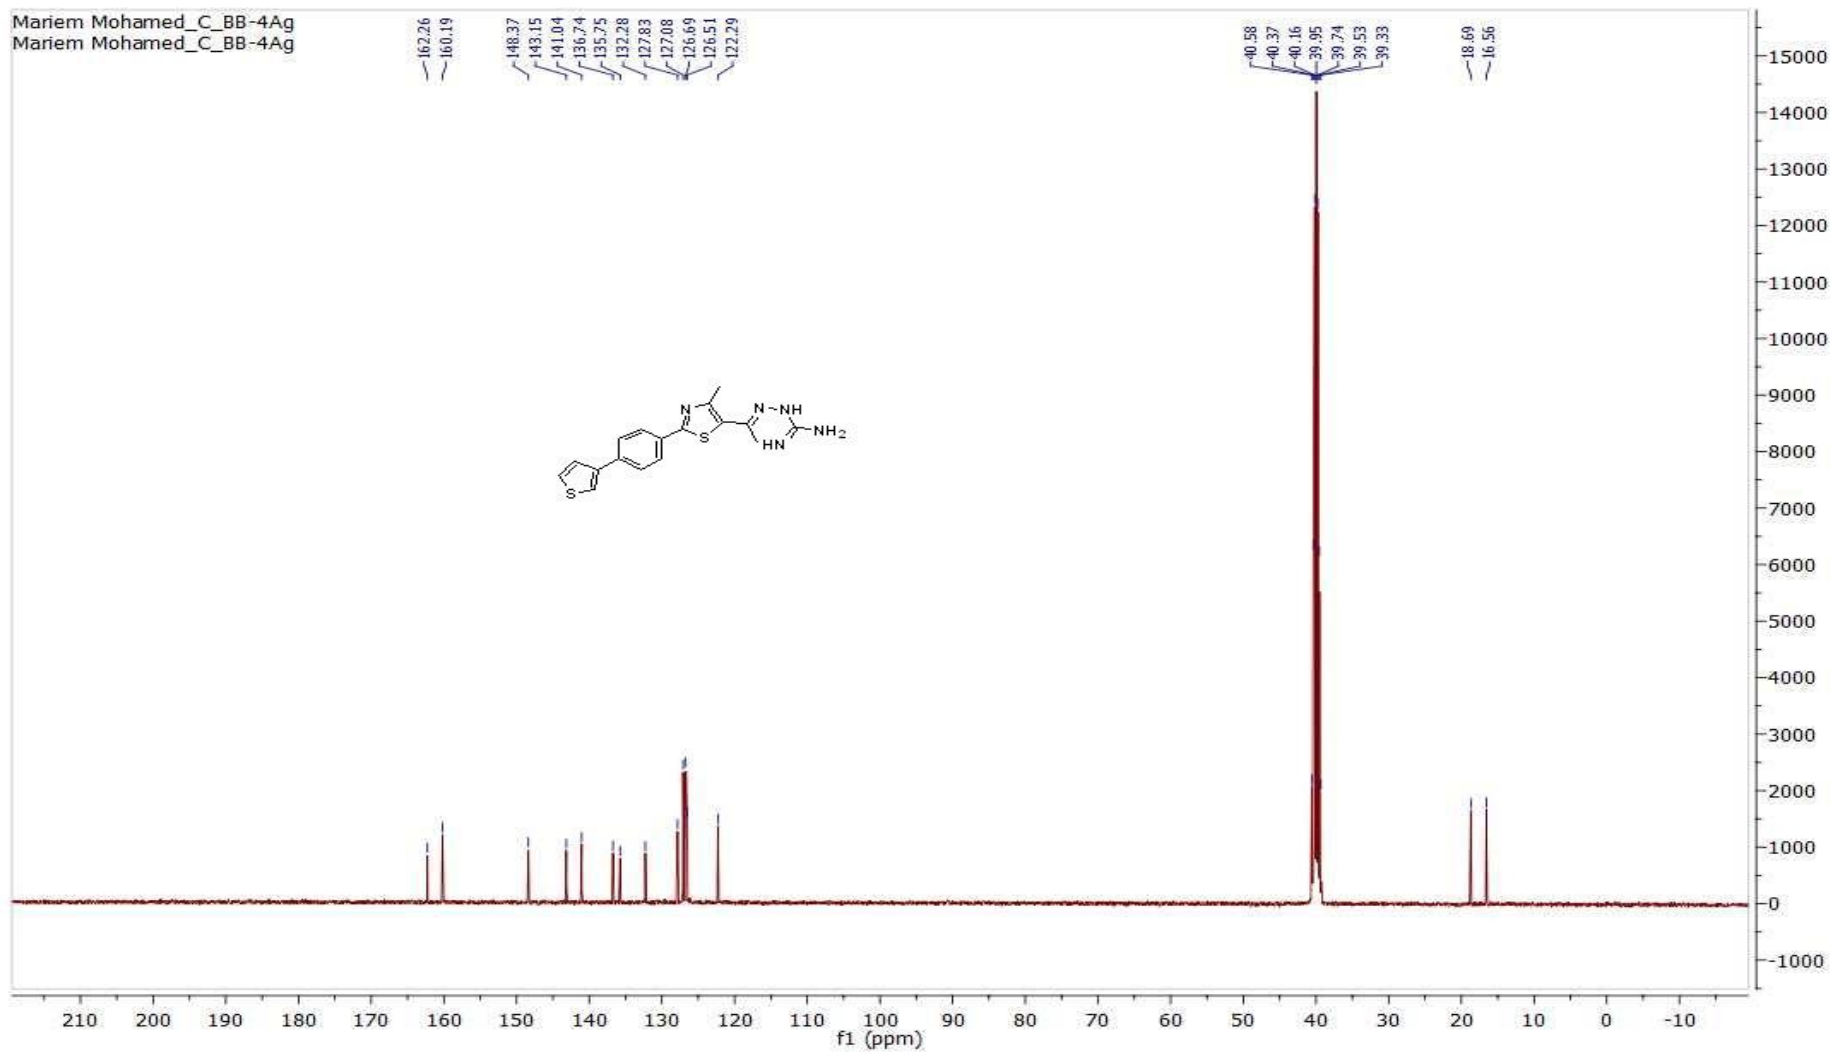

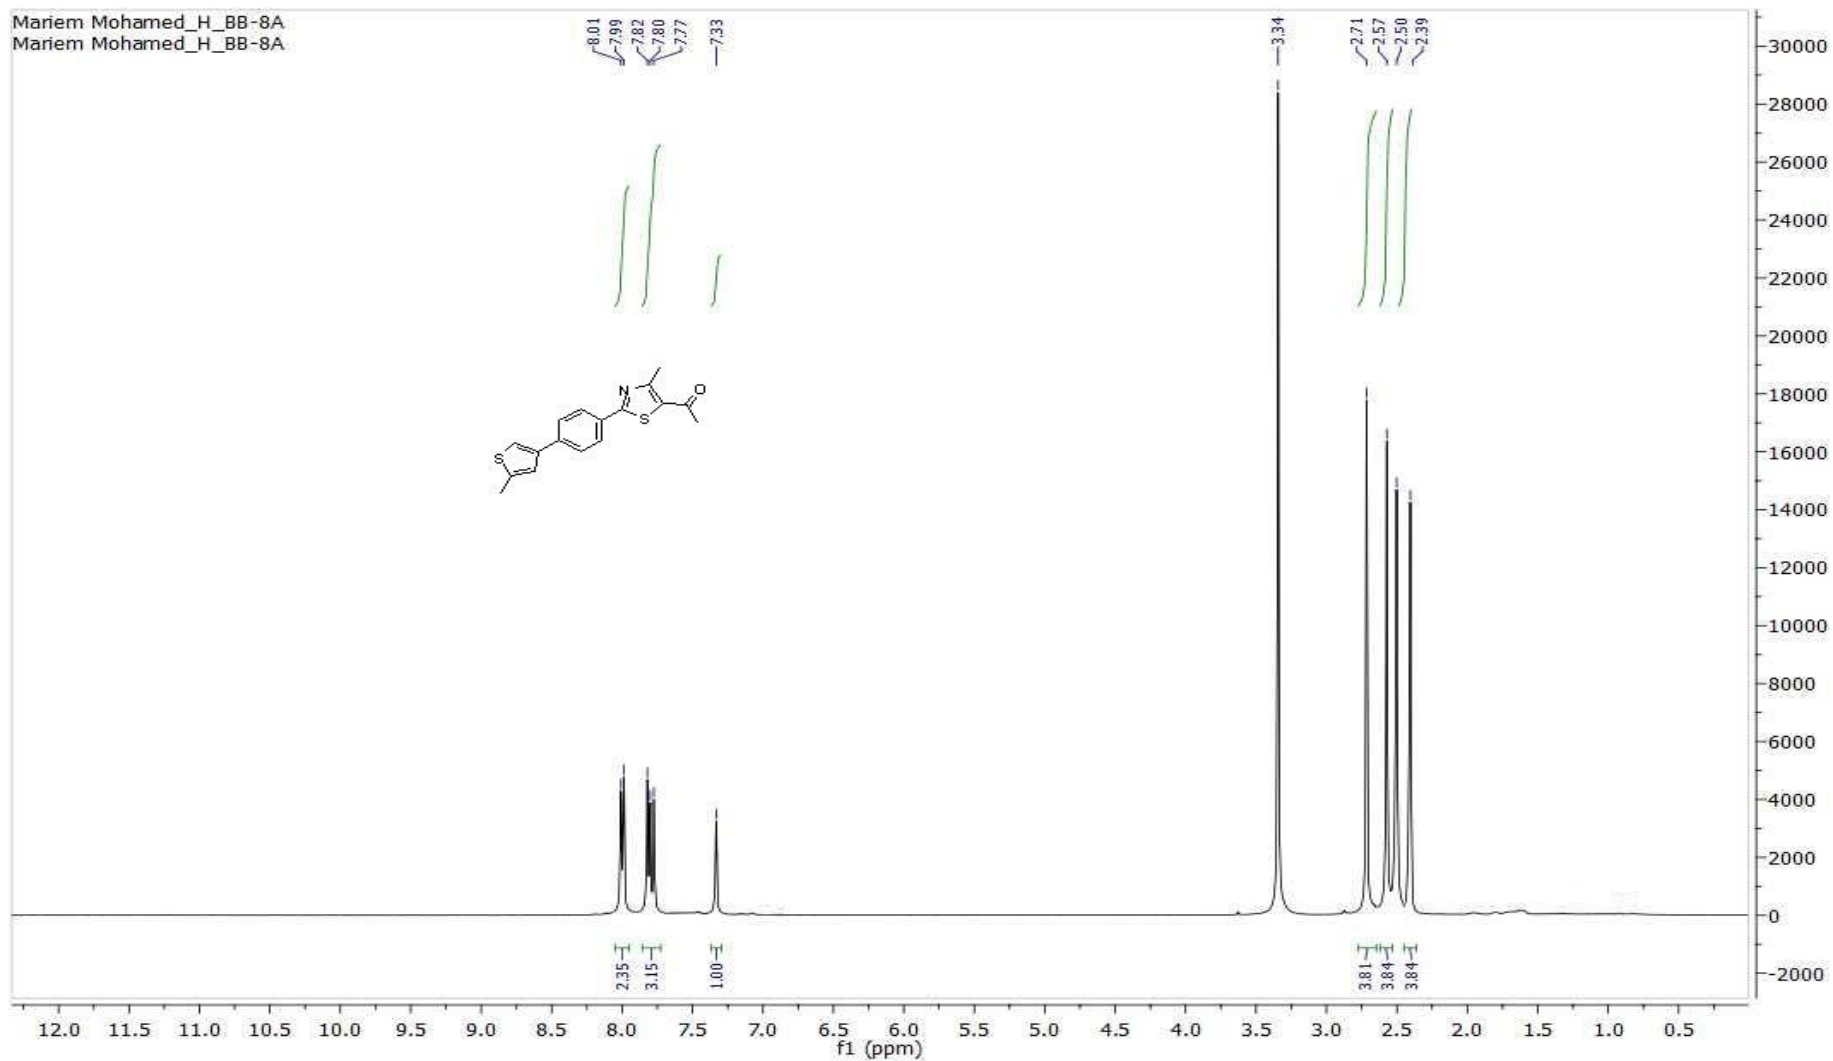



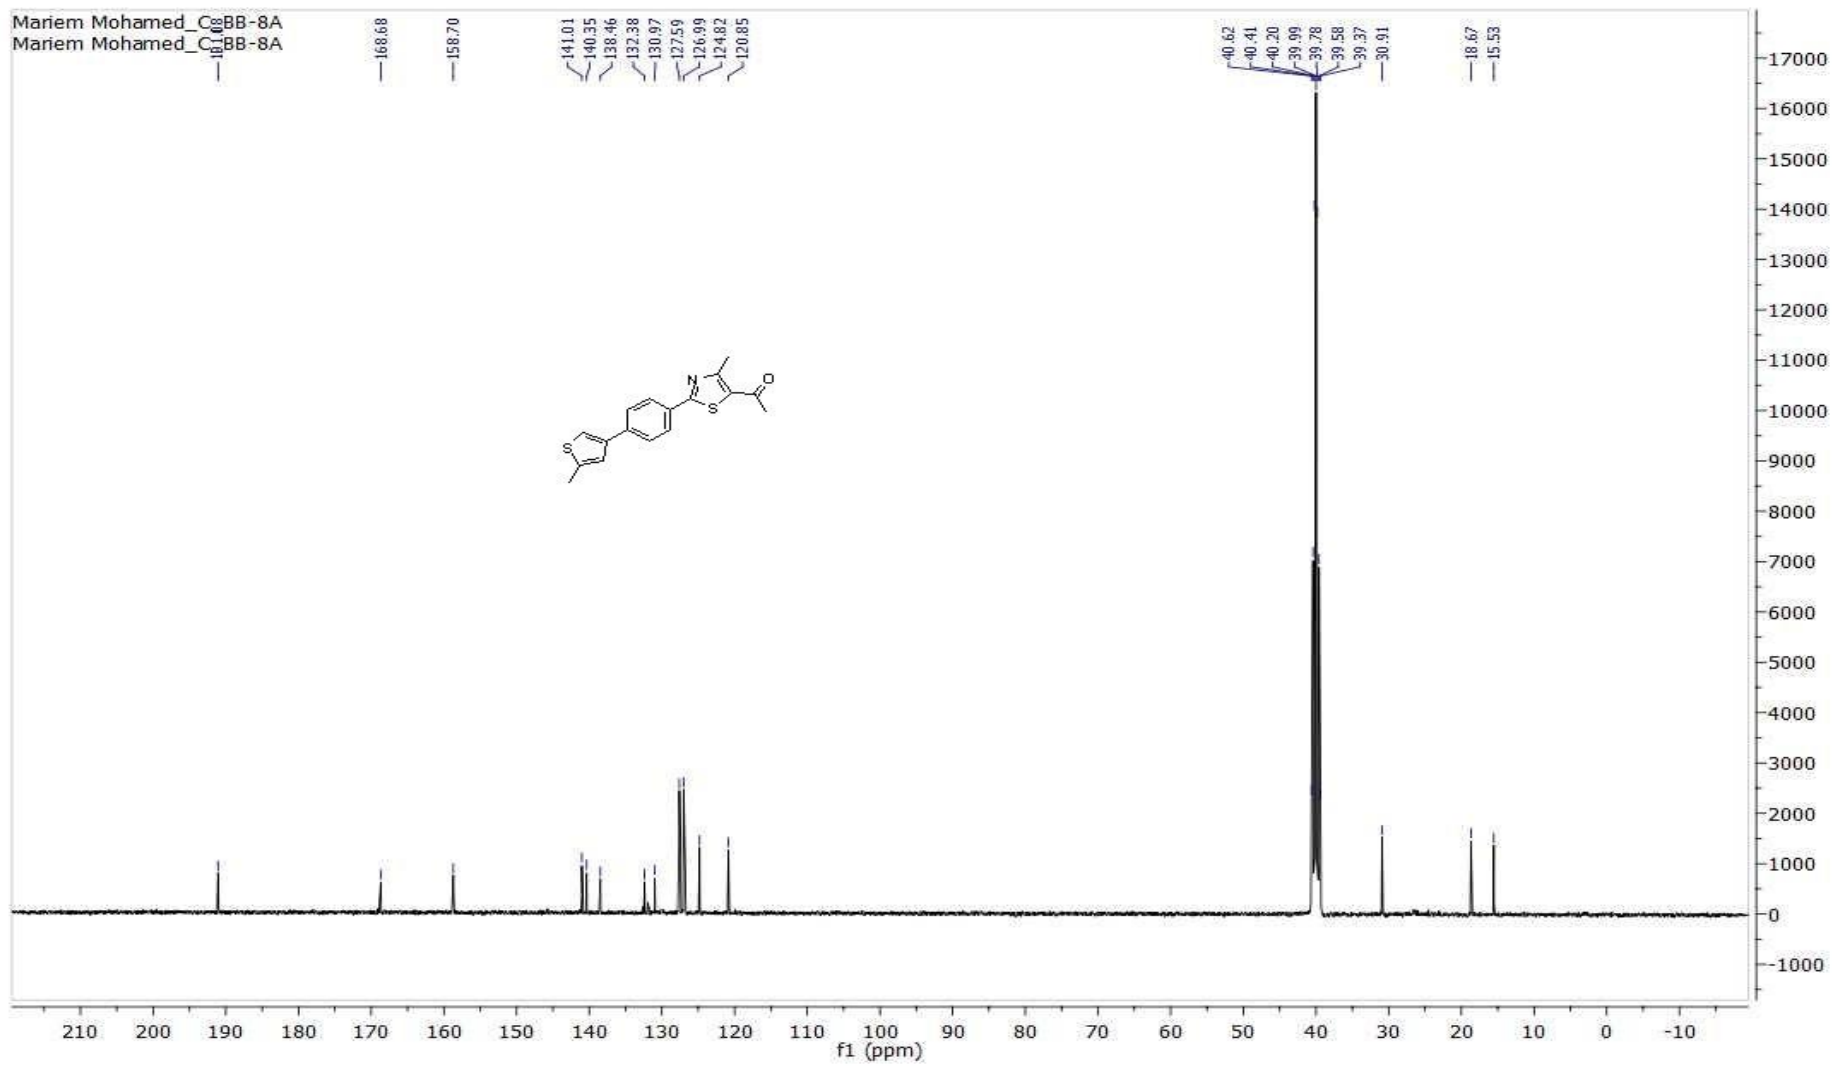

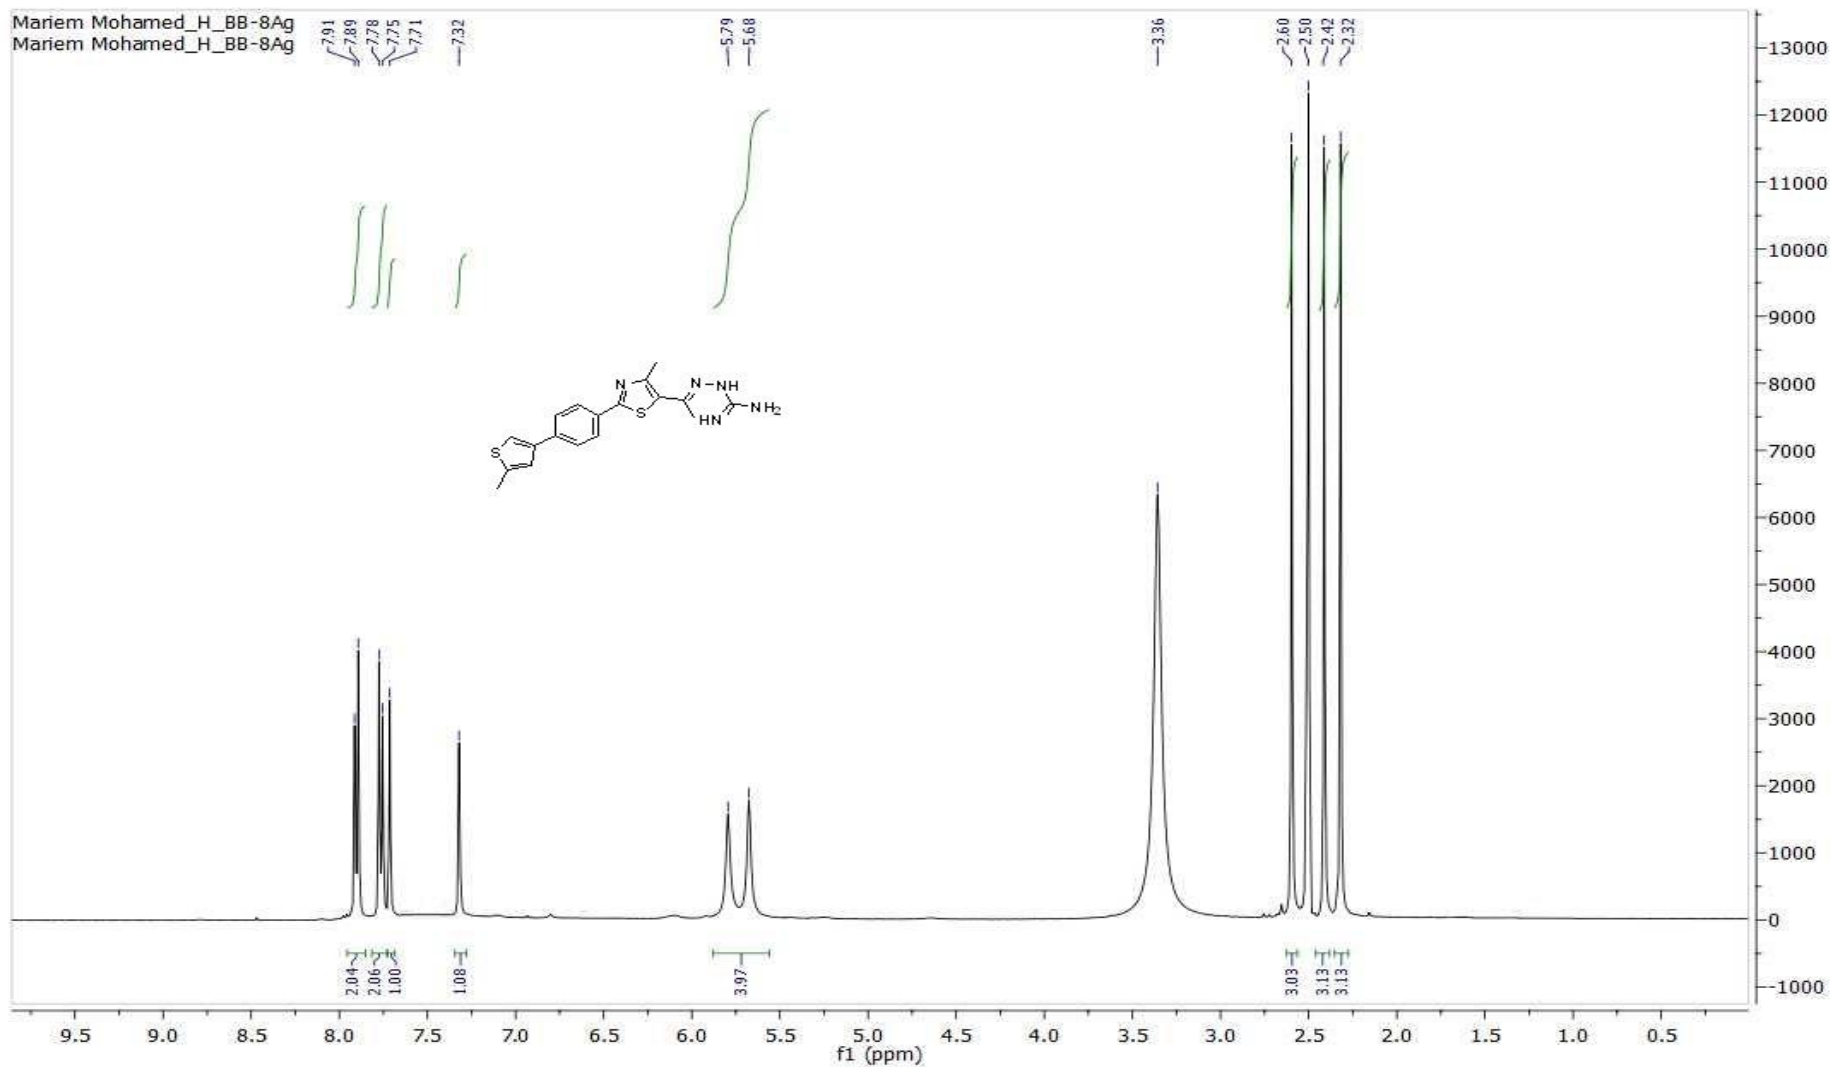

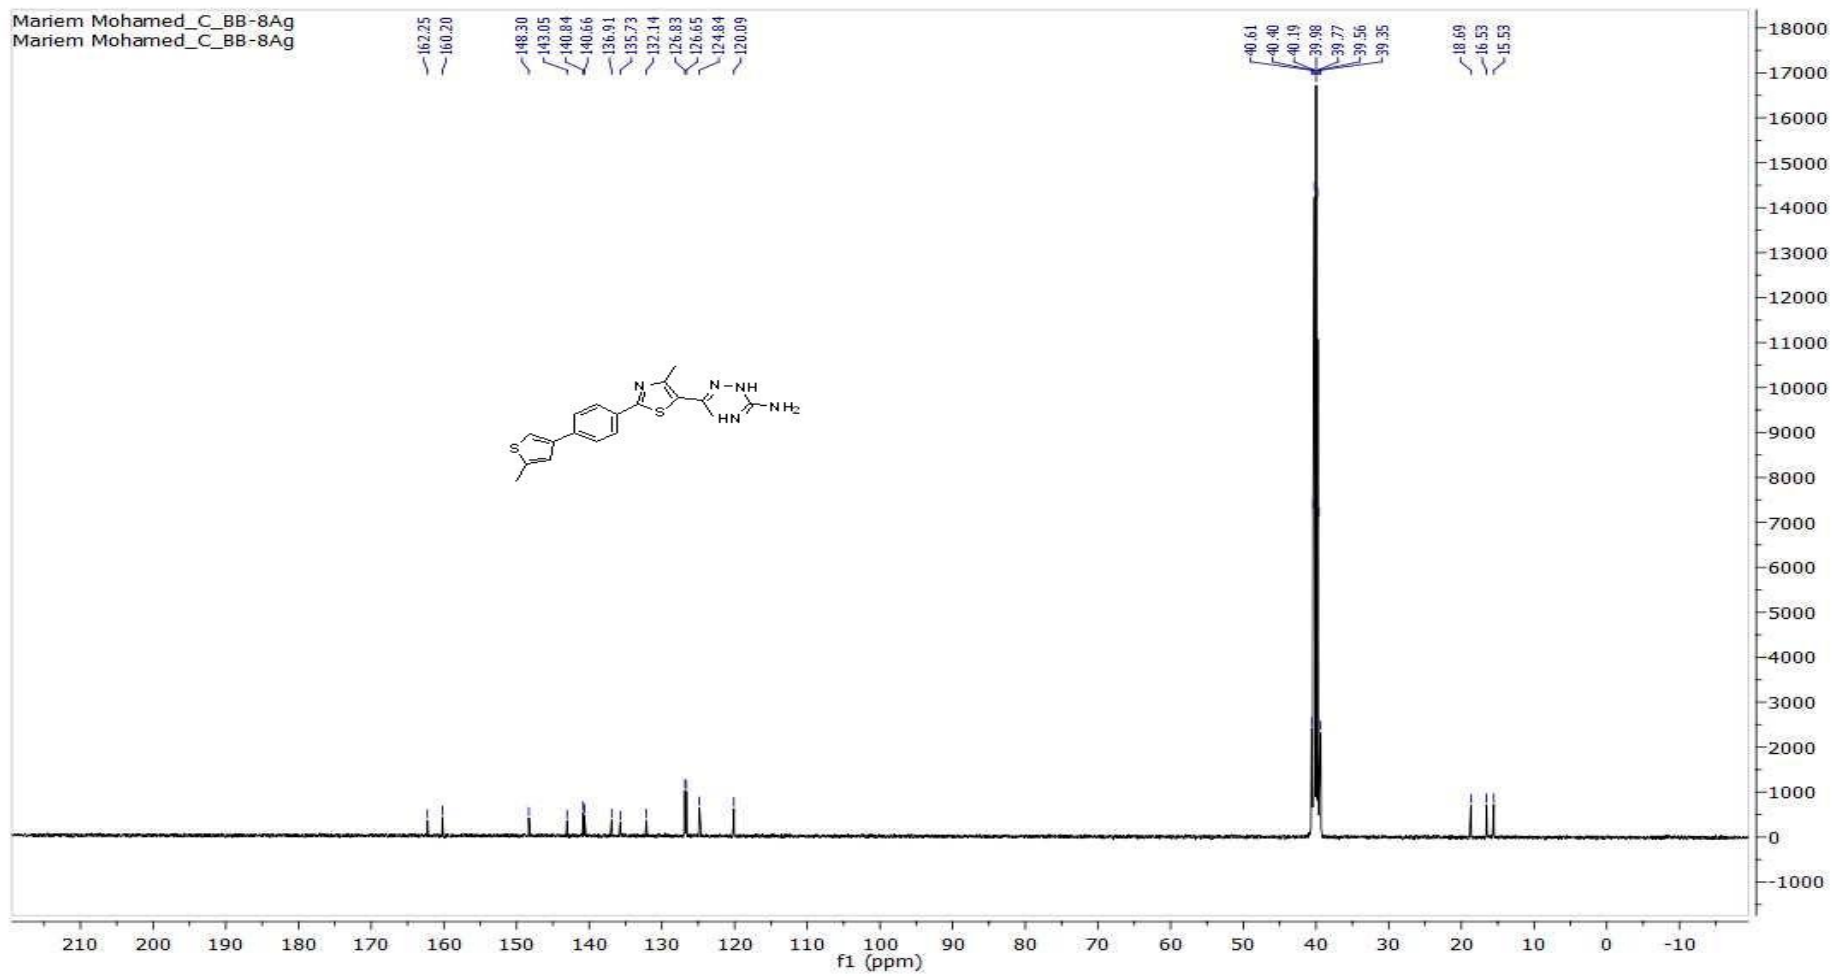

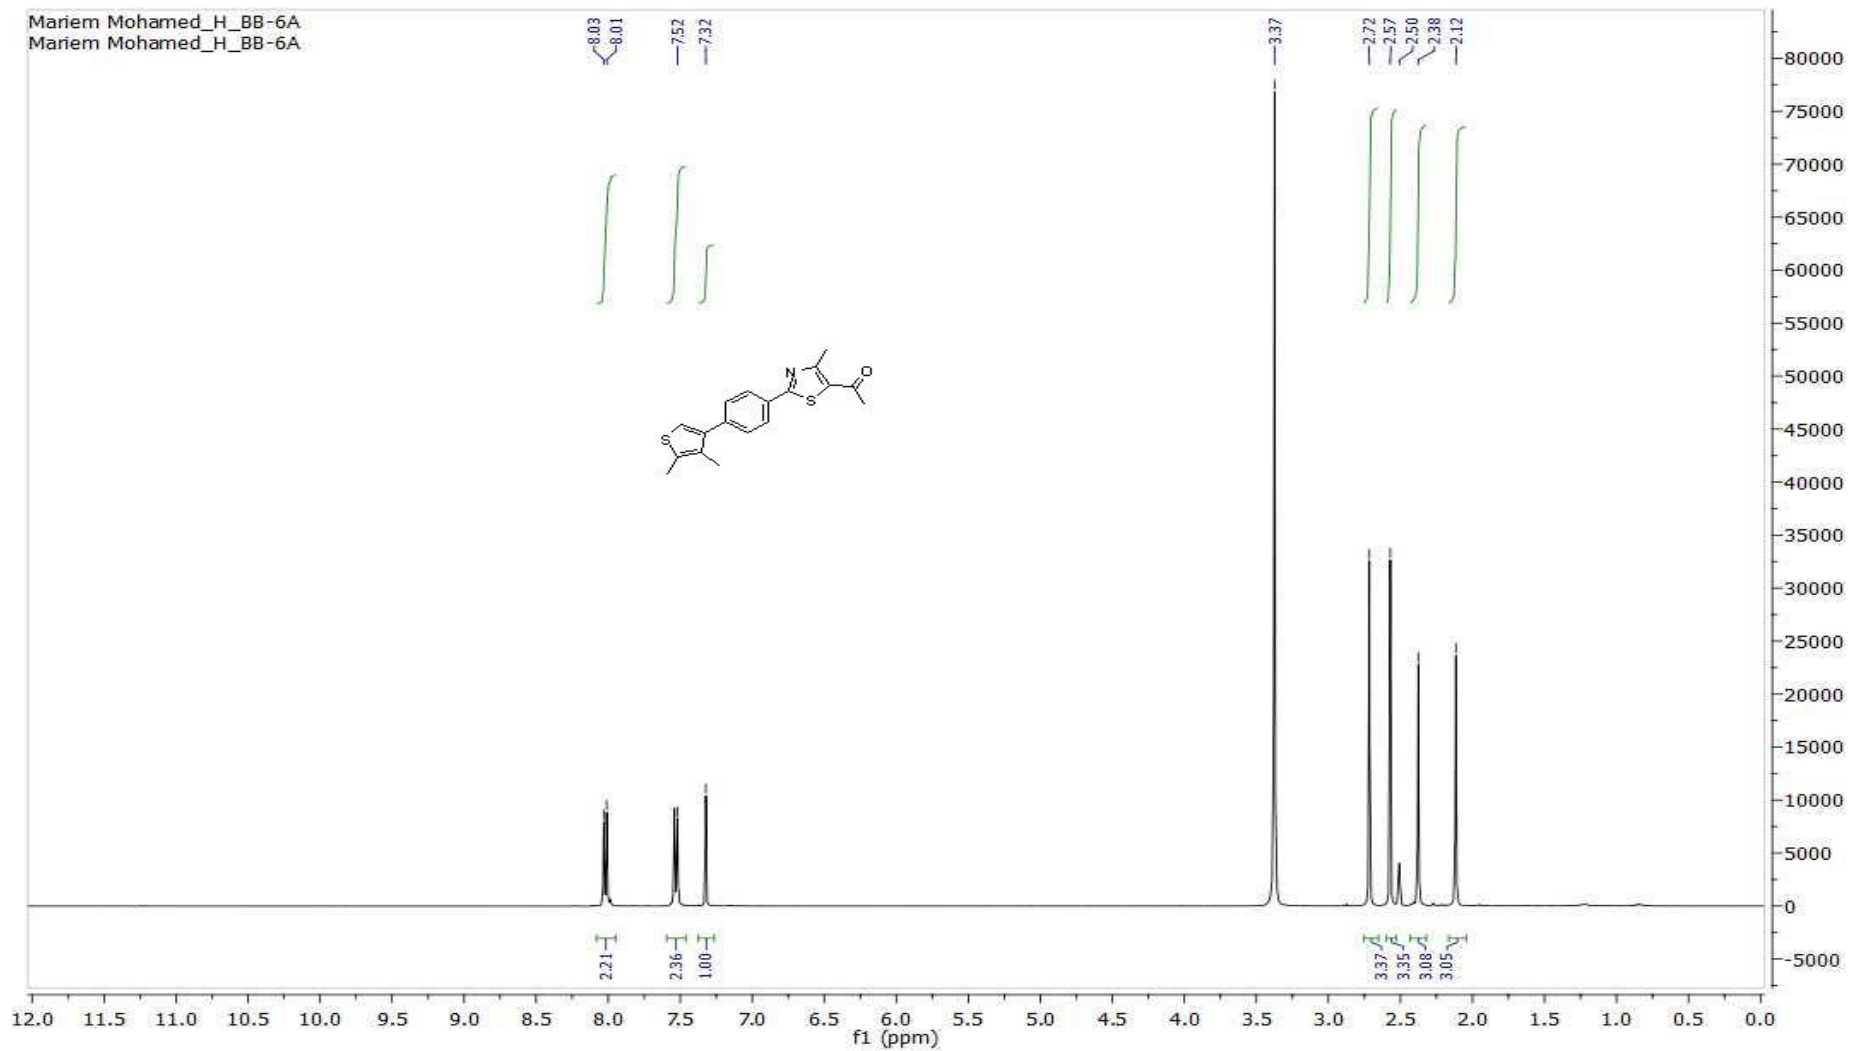

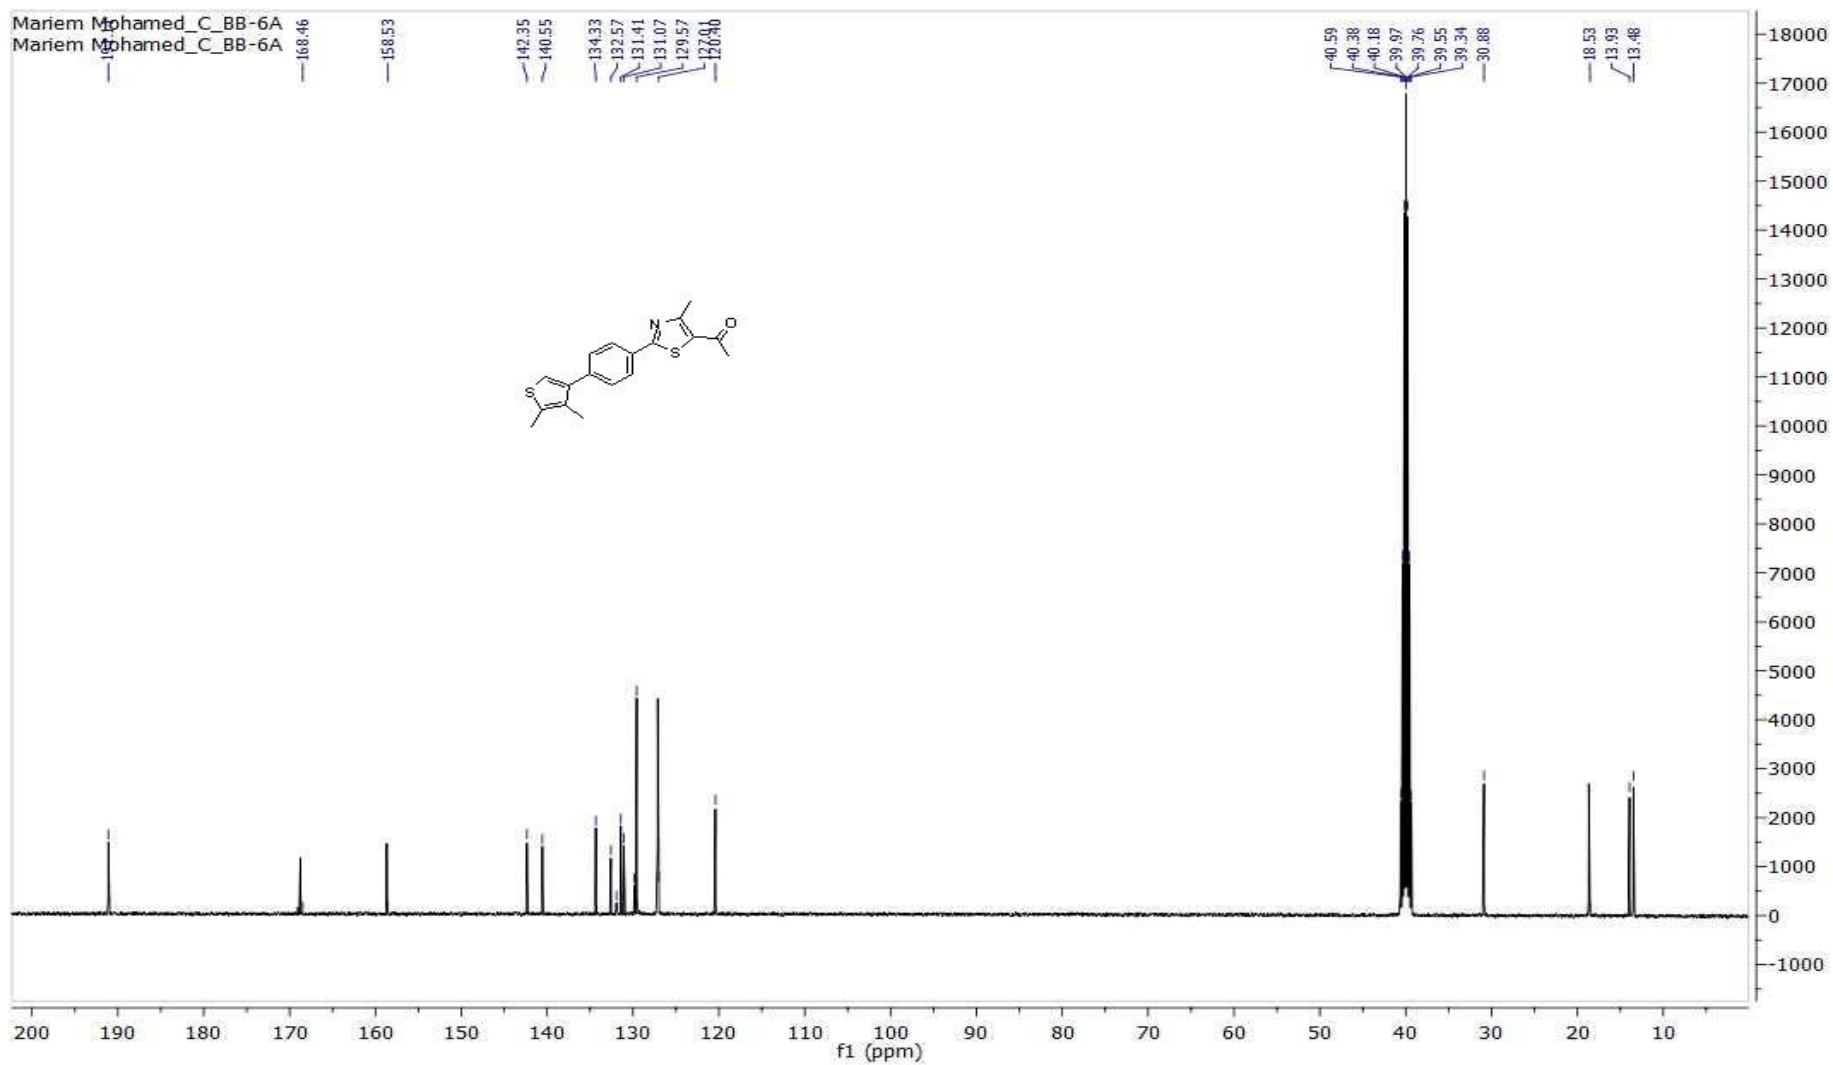

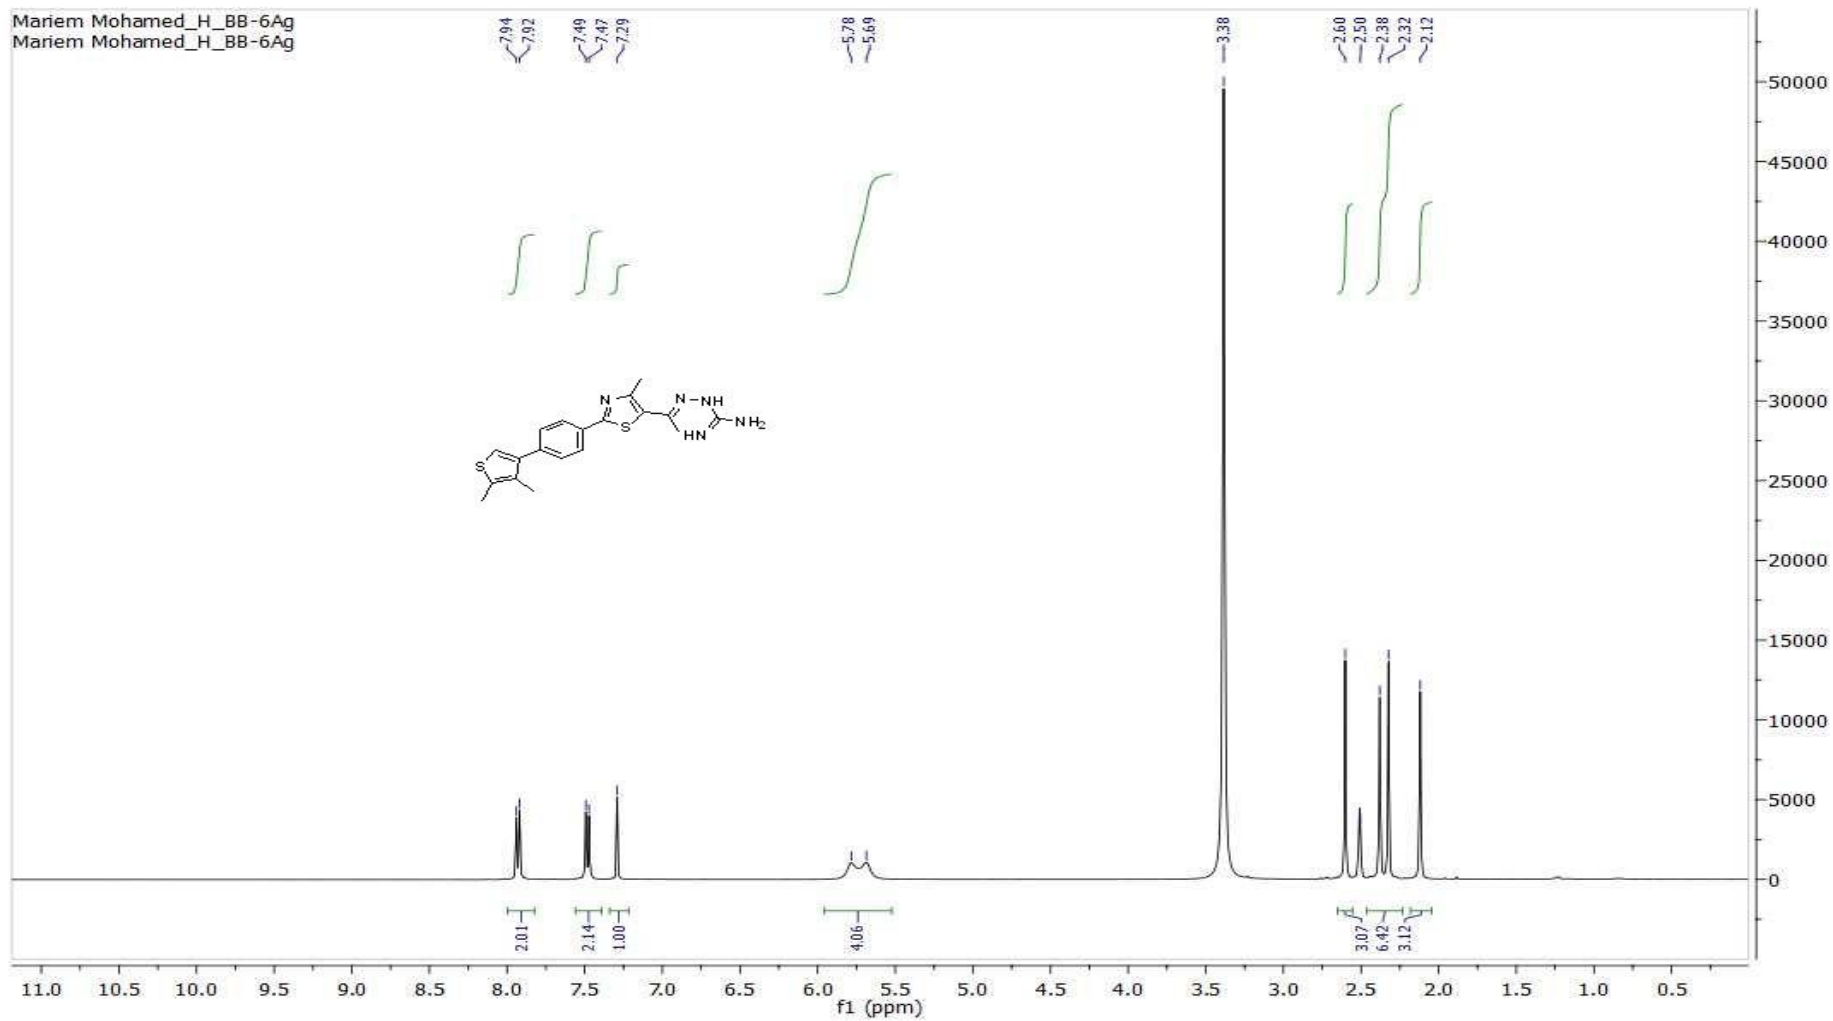

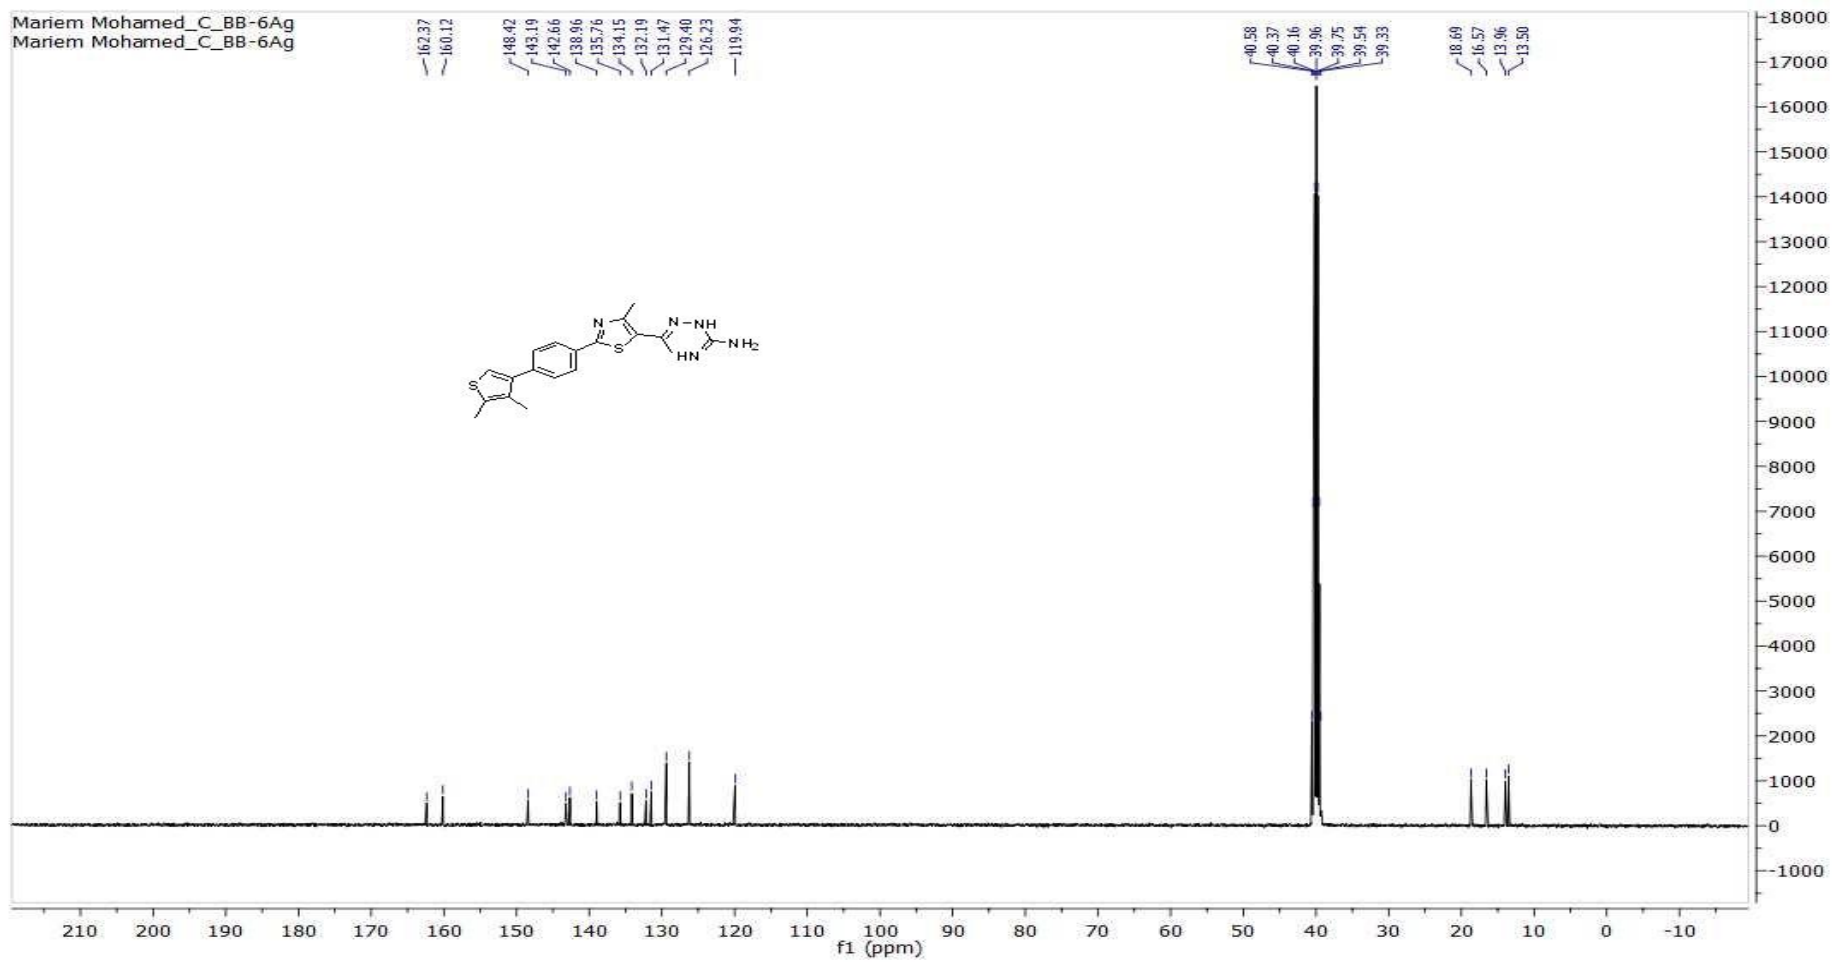

Mariam Mohamed\_H\_MF0-13

Microanalytical Unit - FOPCU - NMR laboratory  
www.pharma.cu.edu.eg dir-mau.fopcu@pharma.cu.edu.eg

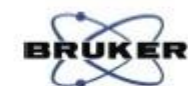

```

Current Data Parameters
NAME      Mariem Mohamed_H_MF0-13
EXPNO     10
PROCNO    1

F2 - Acquisition Parameters
Date_     20220608
Time     16.49
INSTRUM   spect
PROBHD    5 mm PABBO BH/
PULPROG   zg30
TD         65536
SOLVENT   DMSO
NS         32
DS         2
SWH        8012.820 Hz
FIDRES     0.122266 Hz
AQ         4.0094465 sec
RG         129.43
SM         62.400 usec
SE         6.00 usec
TE         298.1 K
D1         1.00000000 sec
TDO        1

===== CHANNEL f1 =====
NUC1       13C
P1         15.00 usec
PL1        0.00 dB
===== CHANNEL f2 =====
SI         65536
SF         400.1900000 MHz
WDW        EM
SSB        0
LB         0.30 Hz
GB         0
PC         1.00
    
```

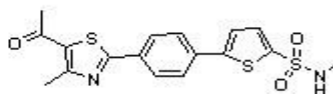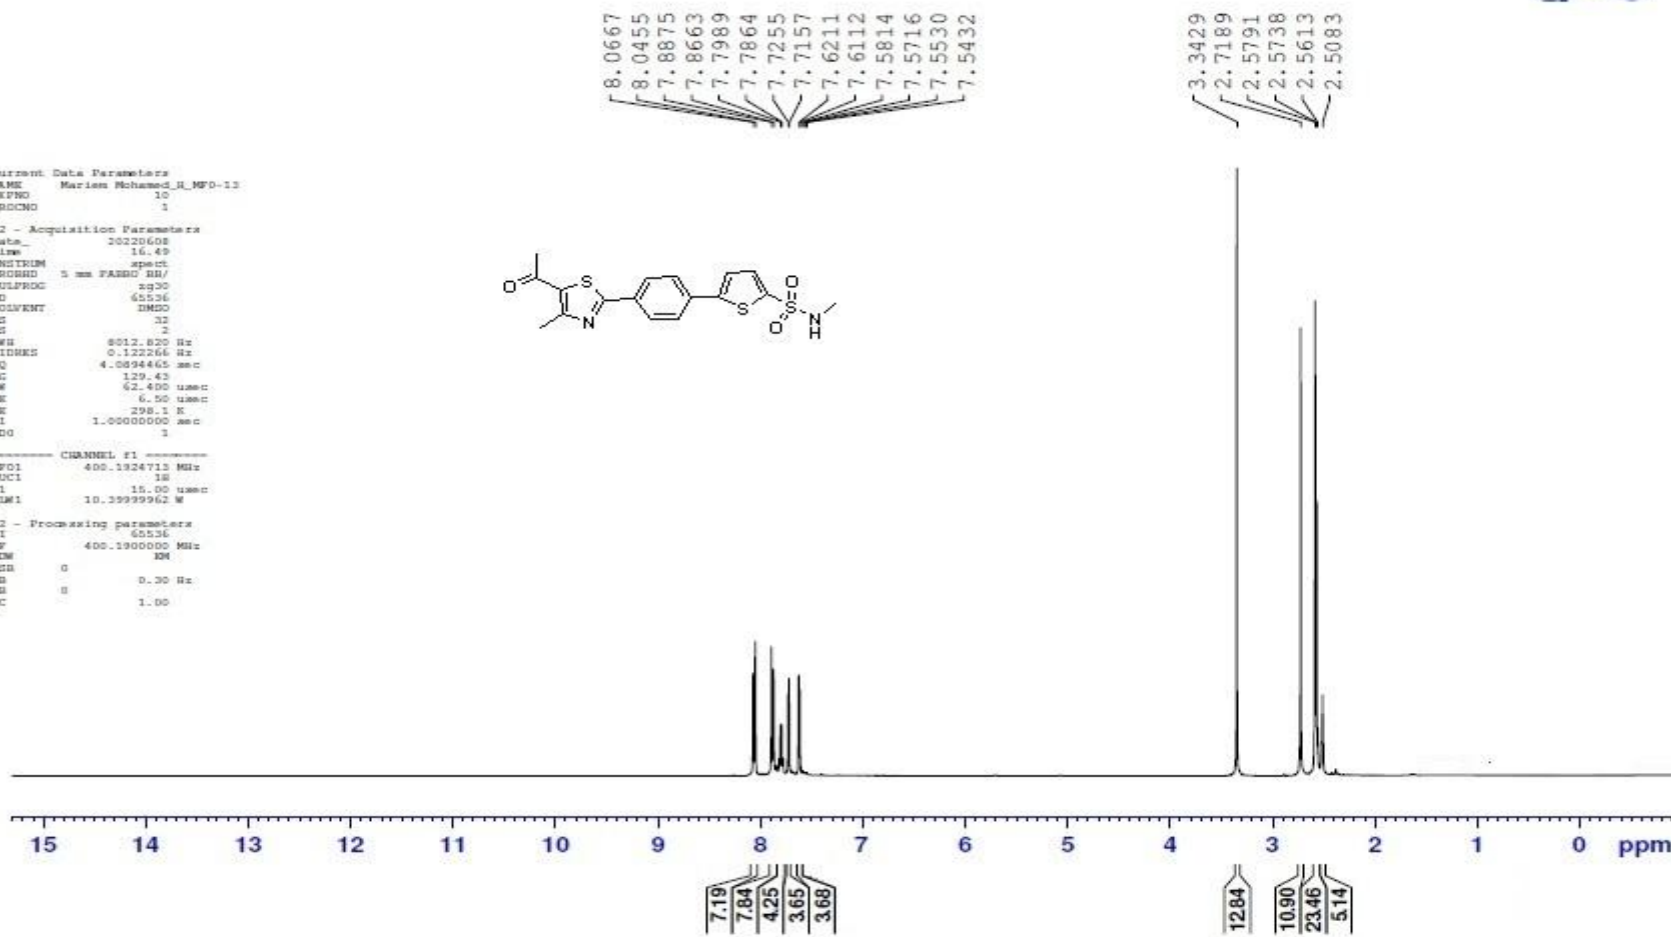



Mariam Mohamed\_C\_MF0-13

Microanalytical Unit - FOPCU - NMR laboratory  
www.pharma.cu.edu.eg dir-mau.fopcu@pharma.cu.edu.eg

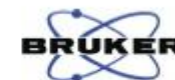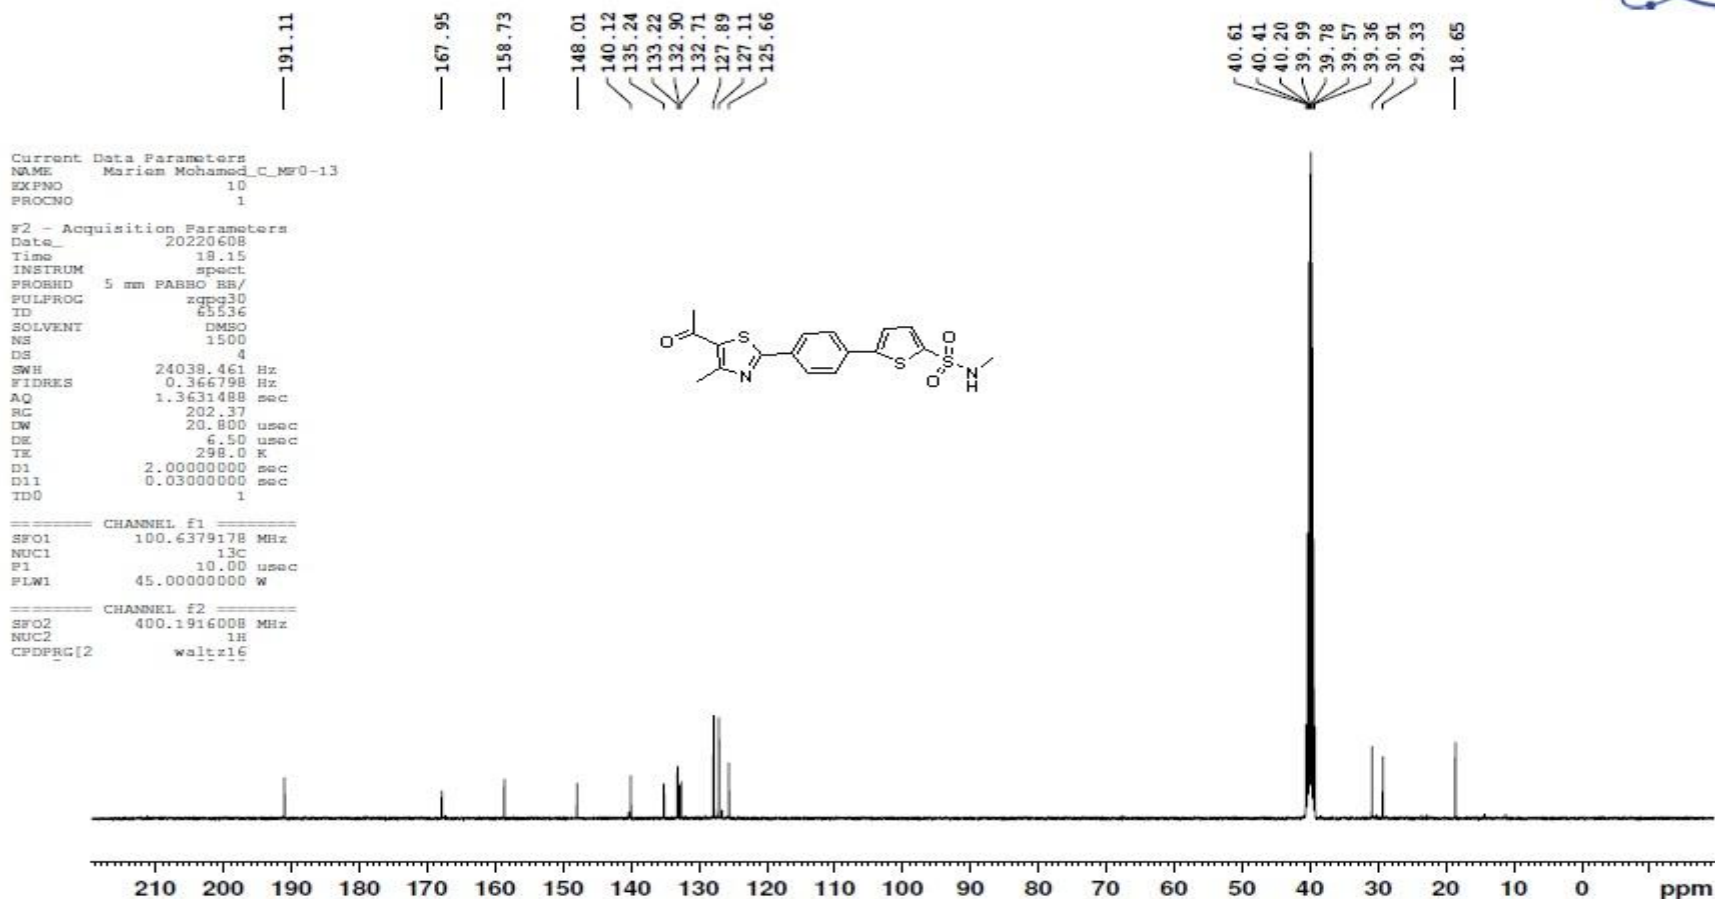

Mariam Mohamed\_H\_MF0-13-Ag

Microanalytical Unit - FOPCU - NMR laboratory  
www.pharma.cu.edu.eg dir-mau.fopcu@pharma.cu.edu.eg

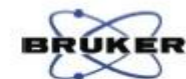

```
Current Data Parameters
NAME: Mariem Mohamed_H_MF0-13-Ag
EXPNO: 10
PROCNO: 1

F2 - Acquisition Parameters
Date_ 20220608
Time 19.21
INSTRUM spect
PROBHD 5 mm PABBO 5H/
PULPROG zg30
TD 65536
SOLVENT DMSO
NS 32
DS 2
SWH 8012.820 Hz
FIDRES 0.122366 Hz
AQ 4.093465 sec
RG 346.06
CW 6.405 usec
DE 6.50 usec
TE 298.0 K
D1 1.0000000 sec
TD0 1

===== CHANNEL f1 =====
NUC1 400.1924713 MHz
P1 18
SFO 400.1924713 MHz
SI 15.00 usec
SI 10.3893962 usec

F2 - Processing parameters
SI 65536
SF 400.1924713 MHz
RG 346.06
DE 6.50 usec
TE 298.0 K
D1 1.00
```

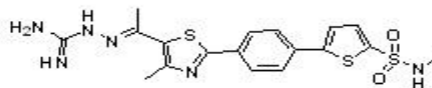

7.9780  
7.9571  
7.8453  
7.8243  
7.6838  
7.6741  
7.6059  
7.5962  
5.7823  
5.6764  
3.3496  
2.6070  
2.5613  
2.5083  
2.3236

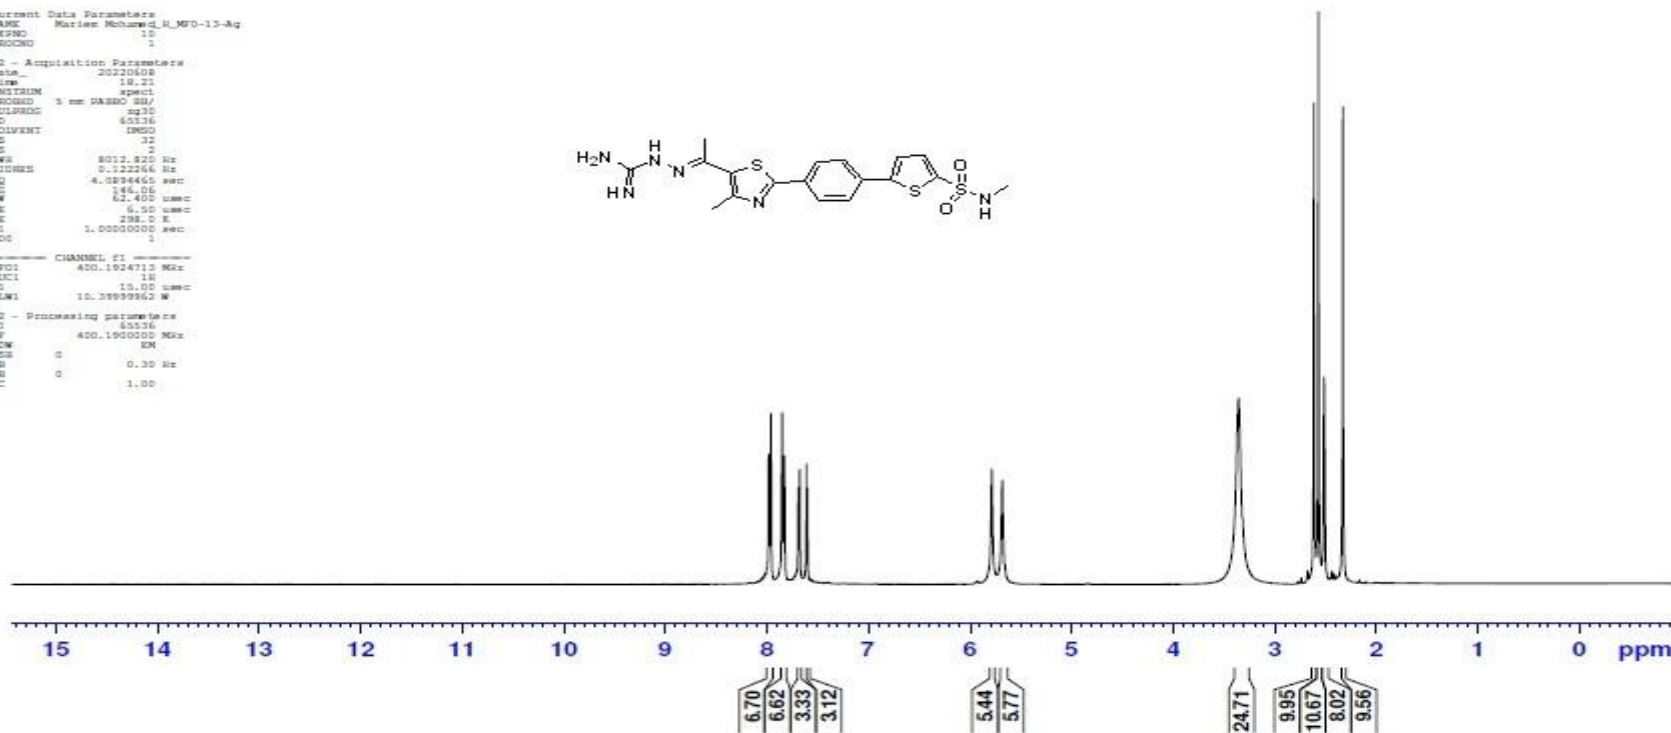

Mariam Mohamed\_C\_MF0-13-Ag

Microanalytical Unit - FOPCU - NMR laboratory  
www.pharma.cu.edu.eg dir-mau.fopcu@pharma.cu.edu.eg

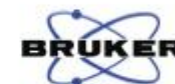

161.51 160.25 148.53 148.46 142.96 139.61 136.45 133.90 133.68 133.20 126.98 126.94 125.08 40.61 40.40 40.19 39.98 39.77 39.57 39.36 29.36 18.69 16.49

Current Data Parameters  
NAME Mariem Mohamed\_C\_MF0-13  
EXPNO 10  
PROCNO 1

F2 - Acquisition Parameters  
Date\_ 20220608  
Time 19.47  
INSTRUM spect  
PROBHD 5 mm PABBO BB/  
PULPROG zgpg30  
TD 65536  
SOLVENT DMSO  
NS 1500  
DS 4  
SWH 24039.461 Hz  
FIDRES 0.366798 Hz  
AQ 1.3631488 sec  
RG 202.37  
DW 20.800 usec  
DE 6.50 usec  
TE 298.0 K  
D1 2.00000000 sec  
D11 0.03000000 sec  
TD0 1

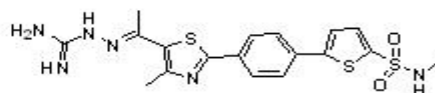

==== CHANNEL F1 =====  
SFO1 100.6379178 MHz  
NUC1 13C  
P1 10.00 usec  
PLW1 45.00000000 W  
  
==== CHANNEL F2 =====  
SFO2 400.1916008 MHz  
NUC2 1H  
CPDPRG[2] waltz16

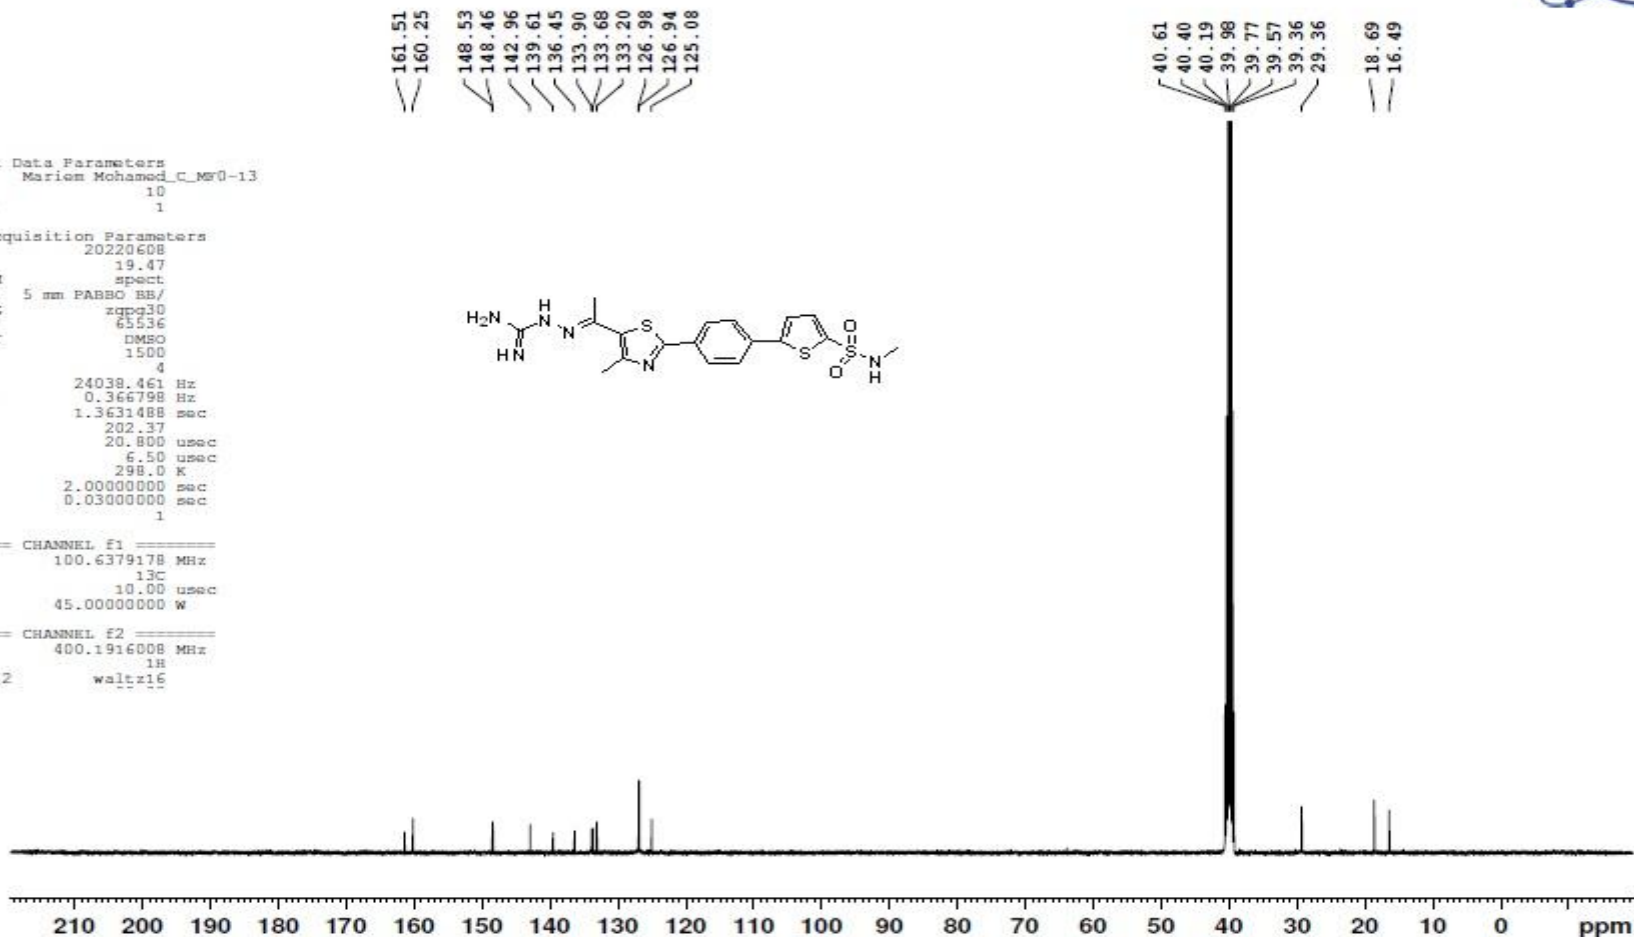

Mariam Mohamed\_H\_MF0-5

Microanalytical Unit - FOPCU - NMR laboratory  
www.pharma.cu.edu.eg dir-mau.fopcu@pharma.cu.edu.eg

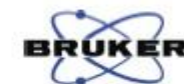

Current Data Parameters  
NAME Mariam Mohamed\_H\_MF0-5  
EXPTNO 10  
PROCNO 1

F2 - Acquisition Parameters  
Date\_ 20220606  
Time 23.09  
INSTRUM spect  
PROBHD 5 mm PABBO BB/  
PULPROG zg30  
TD 65536  
SOLVENT DMSO  
NS 32  
DS 2  
SWH 8012.820 Hz  
FIDRES 0.122266 Hz  
AQ 4.0894665 sec  
RG 146.06  
DM 62.400 umsec  
DE 6.50 umsec  
TE 298.1 K  
D1 1.00000000 sec  
TD0 1

CHANNEL F1  
SFO1 400.1924713 MHz  
NUC1 1H  
P1 15.00 umsec  
PLM1 10.39999962 W

F2 - Processing parameters  
SI 65536  
SF 400.1900000 MHz  
WDW EM  
SSB 0  
LB 0.30 Hz  
GB 0  
PC 1.00

8.0690  
8.0477  
7.9236  
7.9096  
7.8952  
7.8919  
7.8868  
7.8655  
7.7133  
7.7035  
7.6172  
7.6074

3.3389  
2.9779  
2.9599  
2.9456  
2.9419  
2.9277  
2.9097  
2.7397  
2.7210  
2.5815  
2.5087  
1.0715  
1.0535  
1.0354

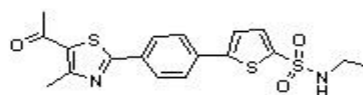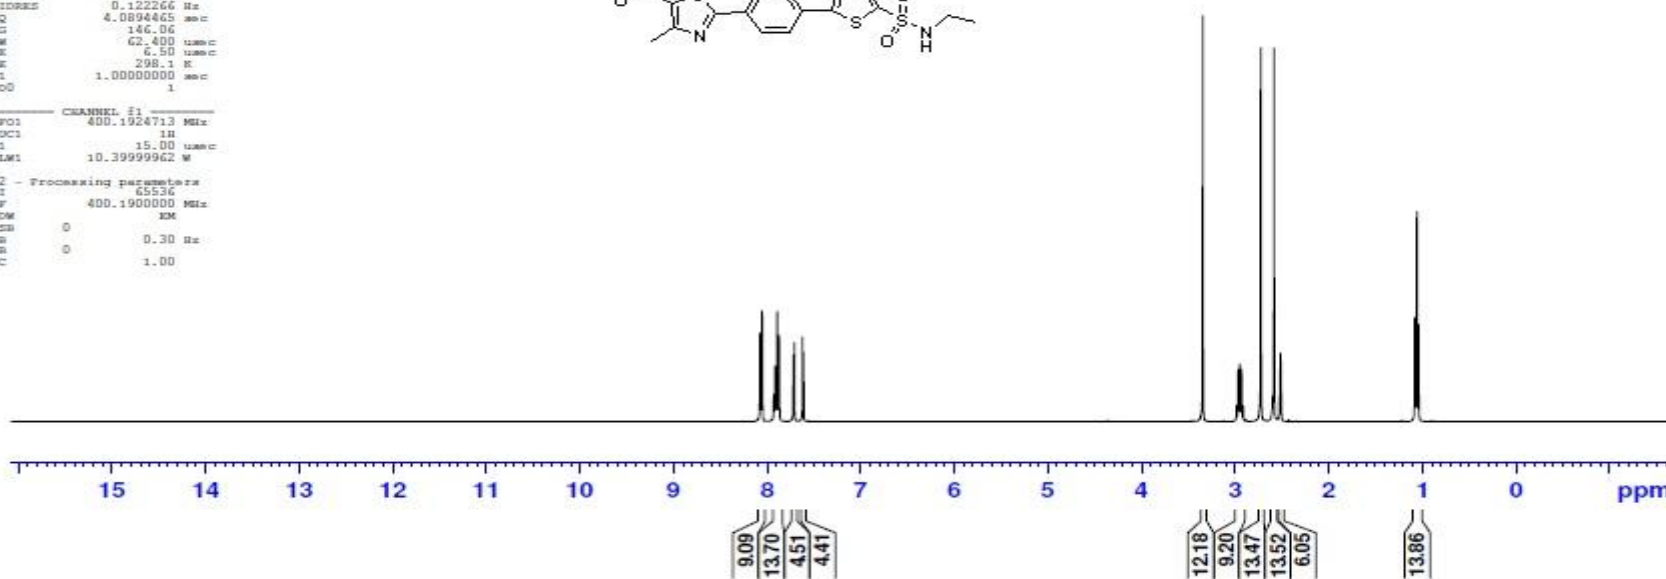

Mariam Mohamed\_C\_MF0-5

Microanalytical Unit - FOPCU - NMR laboratory  
www.pharma.cu.edu.eg dir-mau.fopcu@pharma.cu.edu.eg

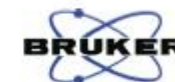

191.12 167.96 158.73 147.85 141.53 135.27 132.96 132.90 132.68 127.89 127.10 125.63 40.62 40.41 40.20 39.99 39.78 39.57 39.37 38.31 30.91 18.65 15.12

Current Data Parameters  
NAME Mariem Mohamed\_C\_MF0-5  
EXPNO 10  
PROCNO 1

F2 - Acquisition Parameters  
Date\_ 20220607  
Time 0.18  
INSTRUM spect  
PROBHD 5 mm PABBO BB/  
PULPROG zgpg30  
TD 65536  
SOLVENT DMSO  
NS 1200  
DS 4  
SWH 24038.461 Hz  
FIDRES 0.366798 Hz  
AQ 1.3631488 sec  
RG 202.37  
DW 20.800 usec  
DE 6.50 usec  
TE 298.0 K  
D1 2.00000000 sec  
D11 0.03000000 sec  
TD0 1

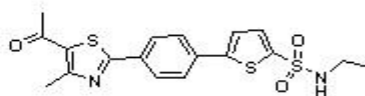

==== CHANNEL F1 =====  
SFO1 100.6379178 MHz  
NUC1 13C  
P1 10.00 usec  
PLW1 45.00000000 W  
  
==== CHANNEL F2 =====  
SFO2 400.1916008 MHz  
NUC2 1H  
CPDPRG[2] waltz16

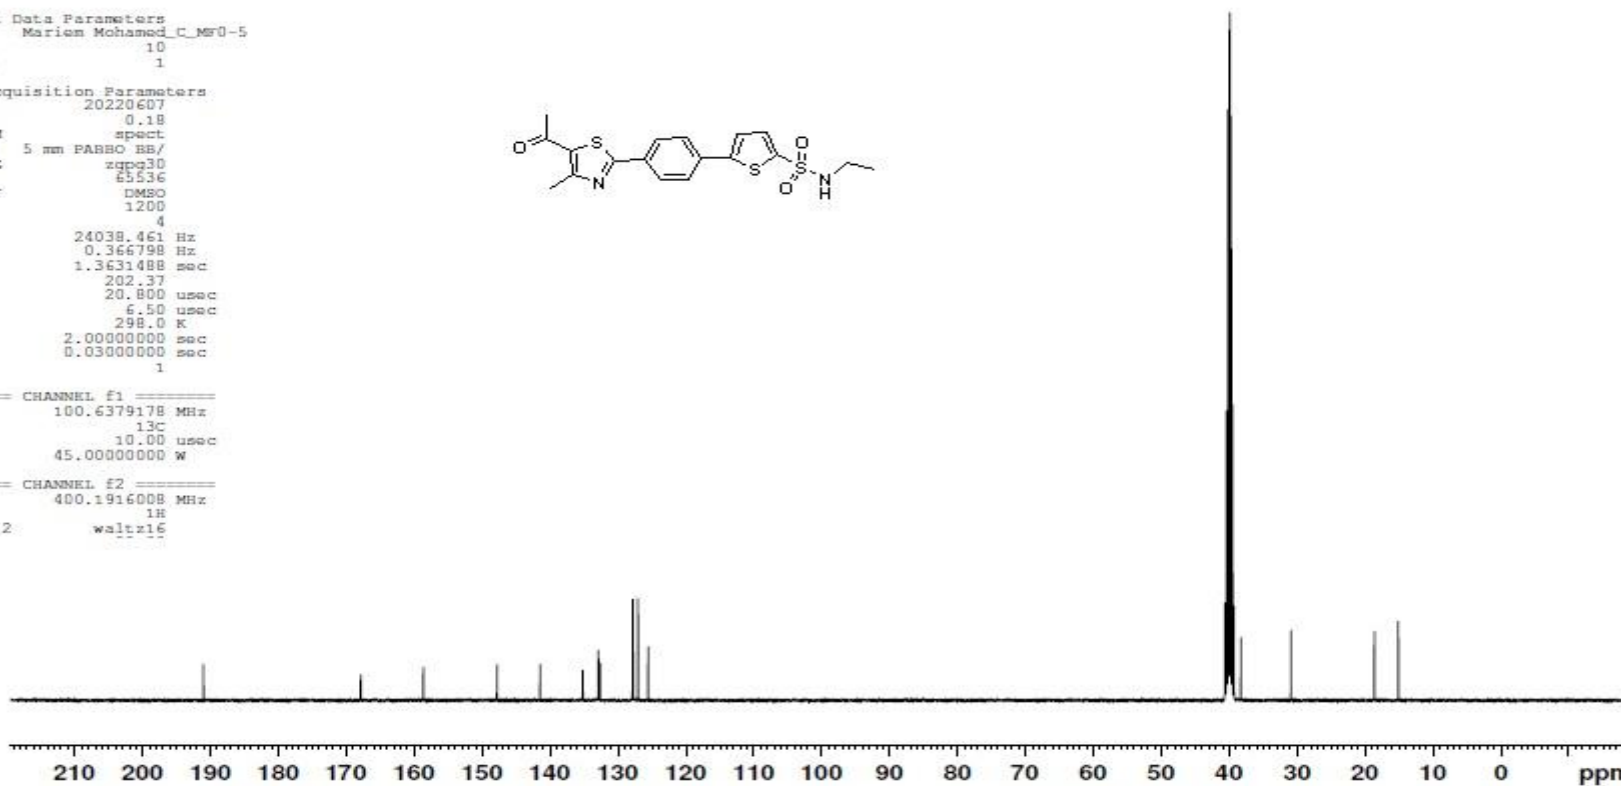

Mariam Mohamed\_H\_MF0-5-Ag

Microanalytical Unit - FOPCU - NMR laboratory  
www.pharma.cu.edu.eg dir-mau.fopcu@pharma.cu.edu.eg

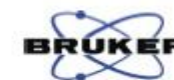

7.9708  
7.9506  
7.8353  
7.8151  
7.6613  
7.6526  
7.6025  
7.5939  
— 5.8932  
3.3628  
2.9643  
2.9478  
2.9301  
2.9133  
2.6062  
2.5090  
2.3301  
1.0690  
1.0512  
1.0335

Current Data Parameters  
NAME: Mariem Mohamed\_H\_MF0-5-Ag  
EXPNO: 10  
PROCNO: 1

F2 - Acquisition Parameters

Date\_ 20220627  
Time 0:24  
INSTRUM spect  
PROBHD 5 mm VASCO 500  
PULPROG zgpg30  
TD 65536  
SOLVENT DMSO  
NS 32  
DS 2  
SWH 9012.820 Hz  
FIDRES 0.122264 Hz  
AQ 4.0294415 sec  
RG 104.37  
DM 62.400 usec  
DE 6.50 usec  
TE 298.0 K  
SI 1.00000000 sec  
TID 1

===== CHANNEL f1 =====

NUC1 400.1924713 MHz  
P1 15.00 usec  
PL1 10.39999962 W

F2 - Processing parameters

SI 65536  
SF 400.1900000 MHz  
WDW EM  
SSB 0  
LB 0.30 Hz  
GB 0  
PC 1.00

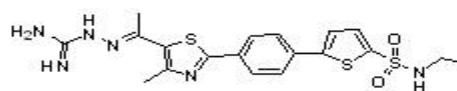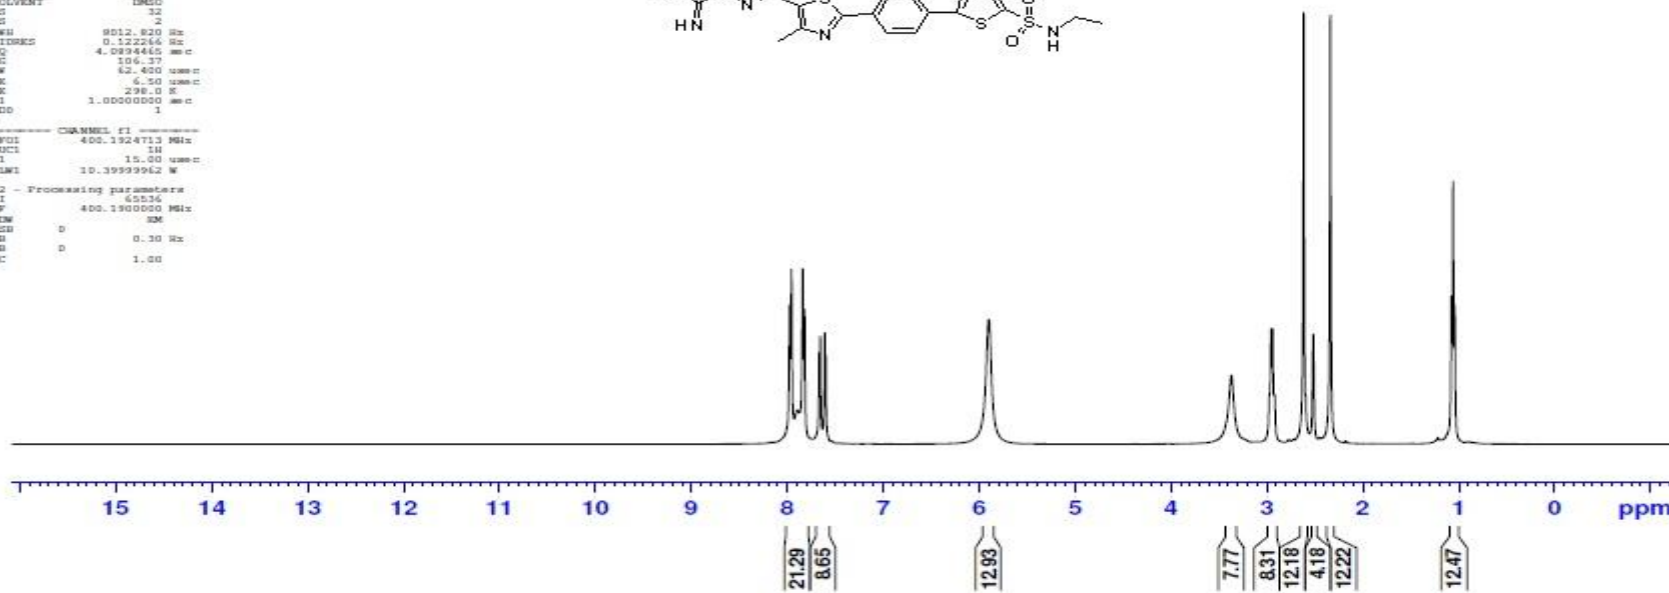

Mariam Mohamed\_C\_MF0-5-Ag

Microanalytical Unit - FOPCU - NMR laboratory  
www.pharma.cu.edu.eg dir-mau.fopcu@pharma.cu.edu.eg

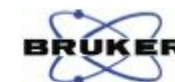

161.73  
159.93  
148.90  
148.32  
143.34  
140.95  
136.06  
133.83  
133.74  
132.96  
125.04

40.61  
40.40  
40.19  
39.98  
39.77  
39.57  
39.36  
38.32  
18.69  
16.64  
15.12

Current Data Parameters  
NAME Mariem Mohamed\_C\_MF0-5-  
EXPNO 10  
PROCNO 1

F2 - Acquisition Parameters  
Date\_ 20220607  
Time 1.33  
INSTRUM spect  
PROBHD 5 mm PABBO BB/  
PULPROG zgpg30  
TD 65536  
SOLVENT DMSO  
NS 1200  
DS 4  
SWH 24038.461 Hz  
FIDRES 0.366798 Hz  
AQ 1.3631488 sec  
RG 202.37  
RW 20.800 usec  
DE 6.50 usec  
TE 298.1 K  
D1 2.00000000 sec  
D11 0.03000000 sec  
TD0 1

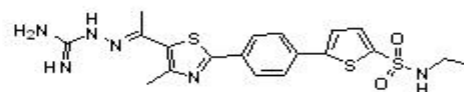

==== CHANNEL F1 =====  
SFO1 100.6379178 MHz  
NUC1 13C  
P1 10.00 usec  
PLW1 45.00000000 W  
==== CHANNEL F2 =====  
SFO2 400.1916008 MHz  
NUC2 1H  
CPDPRG[2] waltz16

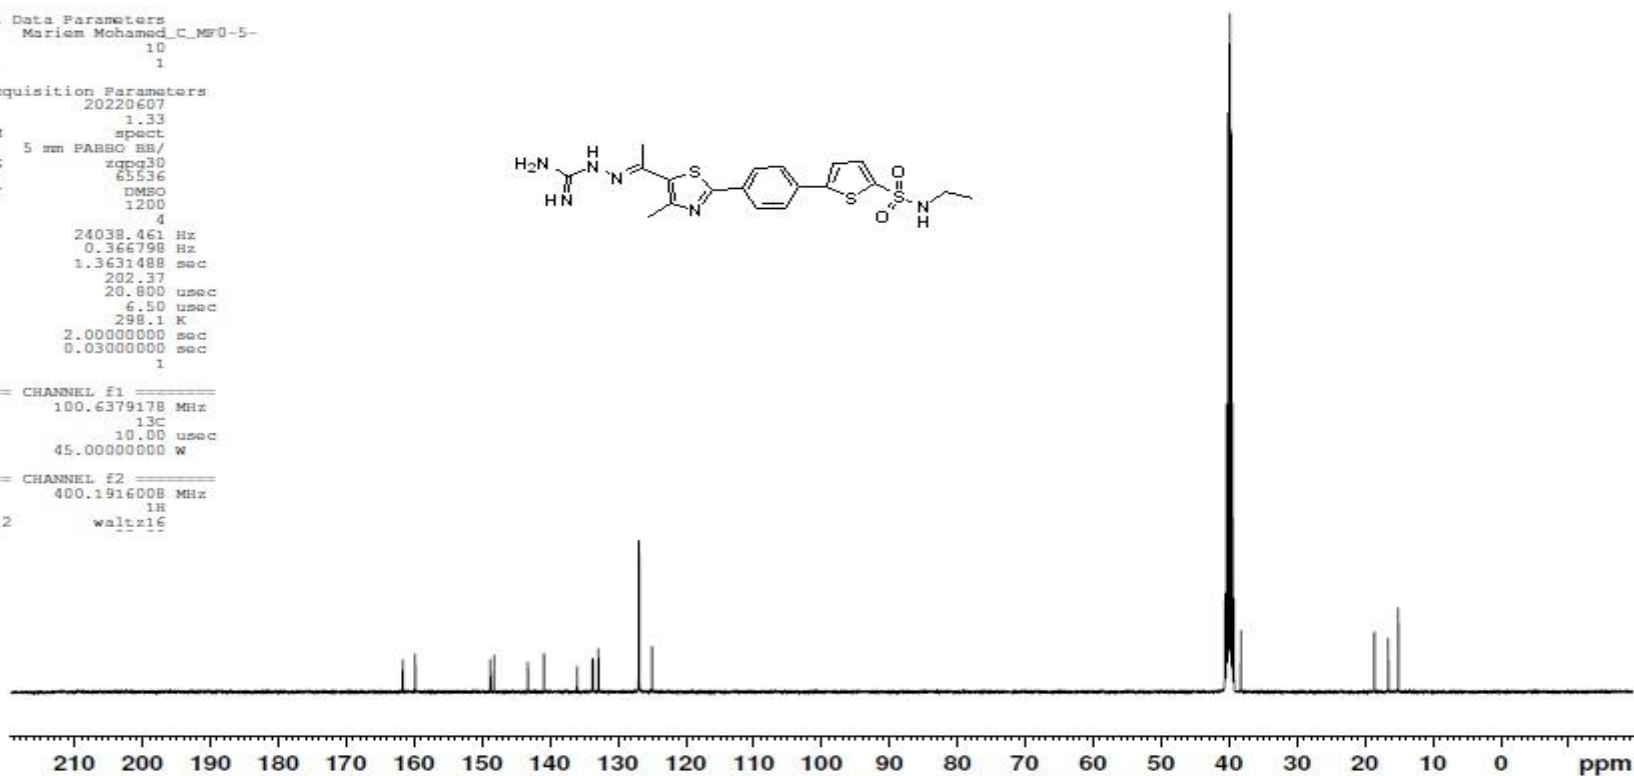

Mariam Mohamed\_H\_MF0-7

Microanalytical Unit - FOPCU - NMR laboratory  
www.pharma.cu.edu.eg dir-mau.fopcu@pharma.cu.edu.eg

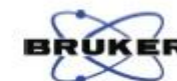

```

Current Data Parameters
NAME: Mariam Mohamed_H_MF0-7
EXPNO: 10
PROCNO: 1

F2 - Acquisition Parameters
Date_: 20220608
Time: 13.44
INSTRUM: spect
PROBHD: 5 mm PABBO BH/
PULPROG: zgpg30
TD: 65536
SOLVENT: DMSO
NS: 32
DS: 2
SWH: 8012.820 Hz
FIDRES: 0.122266 Hz
AQ: 4.0894465 sec
RG: 114.95
DM: 62.400 usec
DE: 6.50 usec
TE: 298.1 K
D1: 1.00000000 sec
TDO: 1

CHANNEL f1
NUC1: 13C
P1: 15.00 usec
PL1: 10.39999962 W

F2 - Processing parameters
SI: 65536
SF: 400.1900000 MHz
WDW: RM
SSB: 0
LB: 0.30 Hz
GB: 0
PC: 1.00
    
```

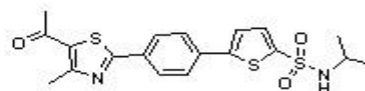

8.0781  
8.0571  
7.9505  
7.9324  
7.8939  
7.8731  
7.7064  
7.6966  
7.6197  
7.6100

4.3679  
4.3552  
4.3426  
4.4622  
3.4494  
3.4448  
3.4320  
3.3440  
2.7265  
2.5870  
2.5083

1.0788  
1.0613  
1.0518  
1.0438  
1.0355

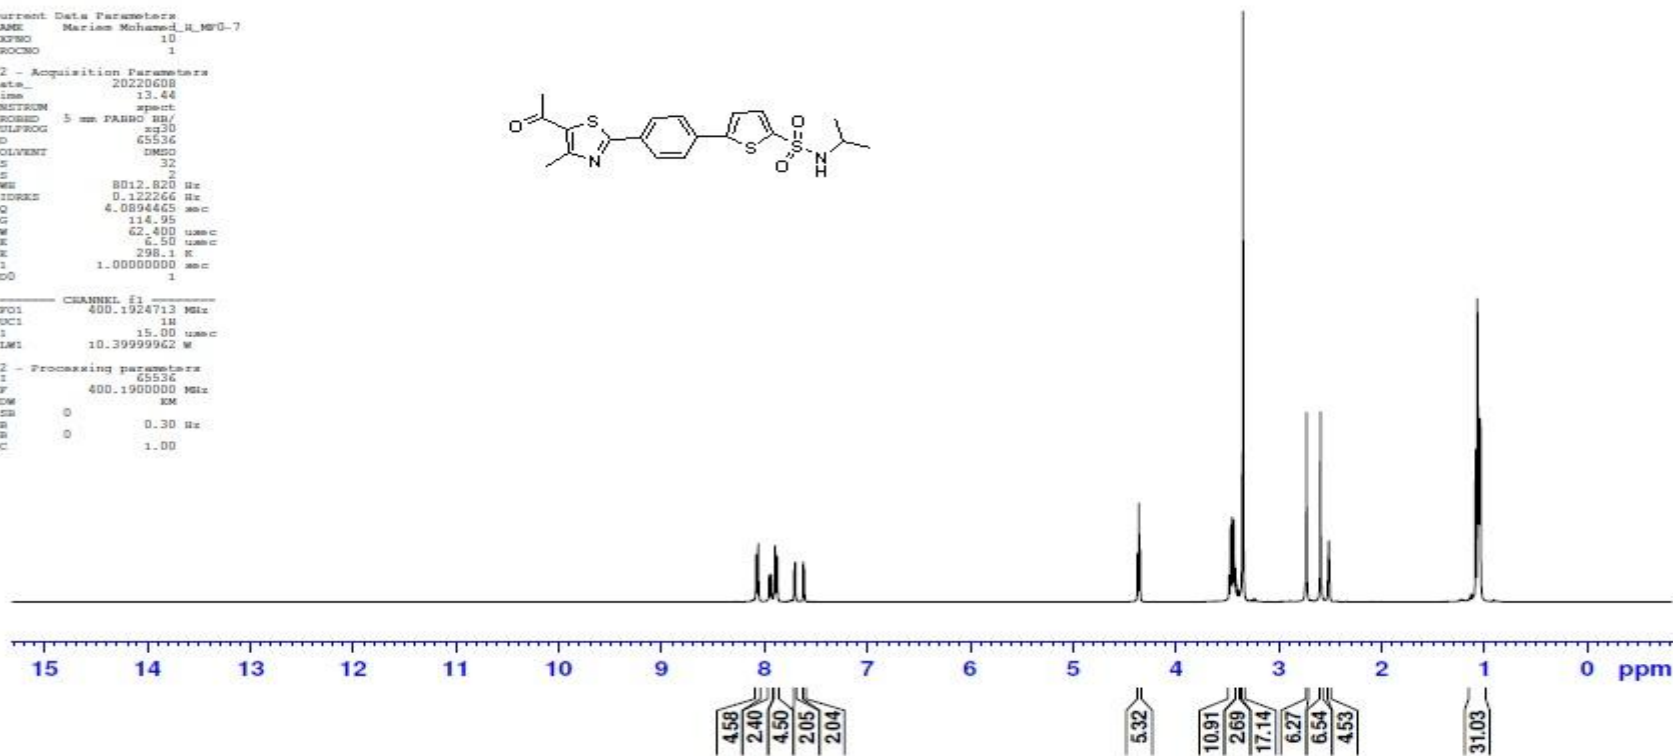



Mariam Mohamed\_C\_MF0-7

Microanalytical Unit - FOPCU - NMR laboratory  
www.pharma.cu.edu.eg dir-mau.fopcu@pharma.cu.edu.eg

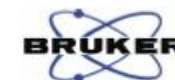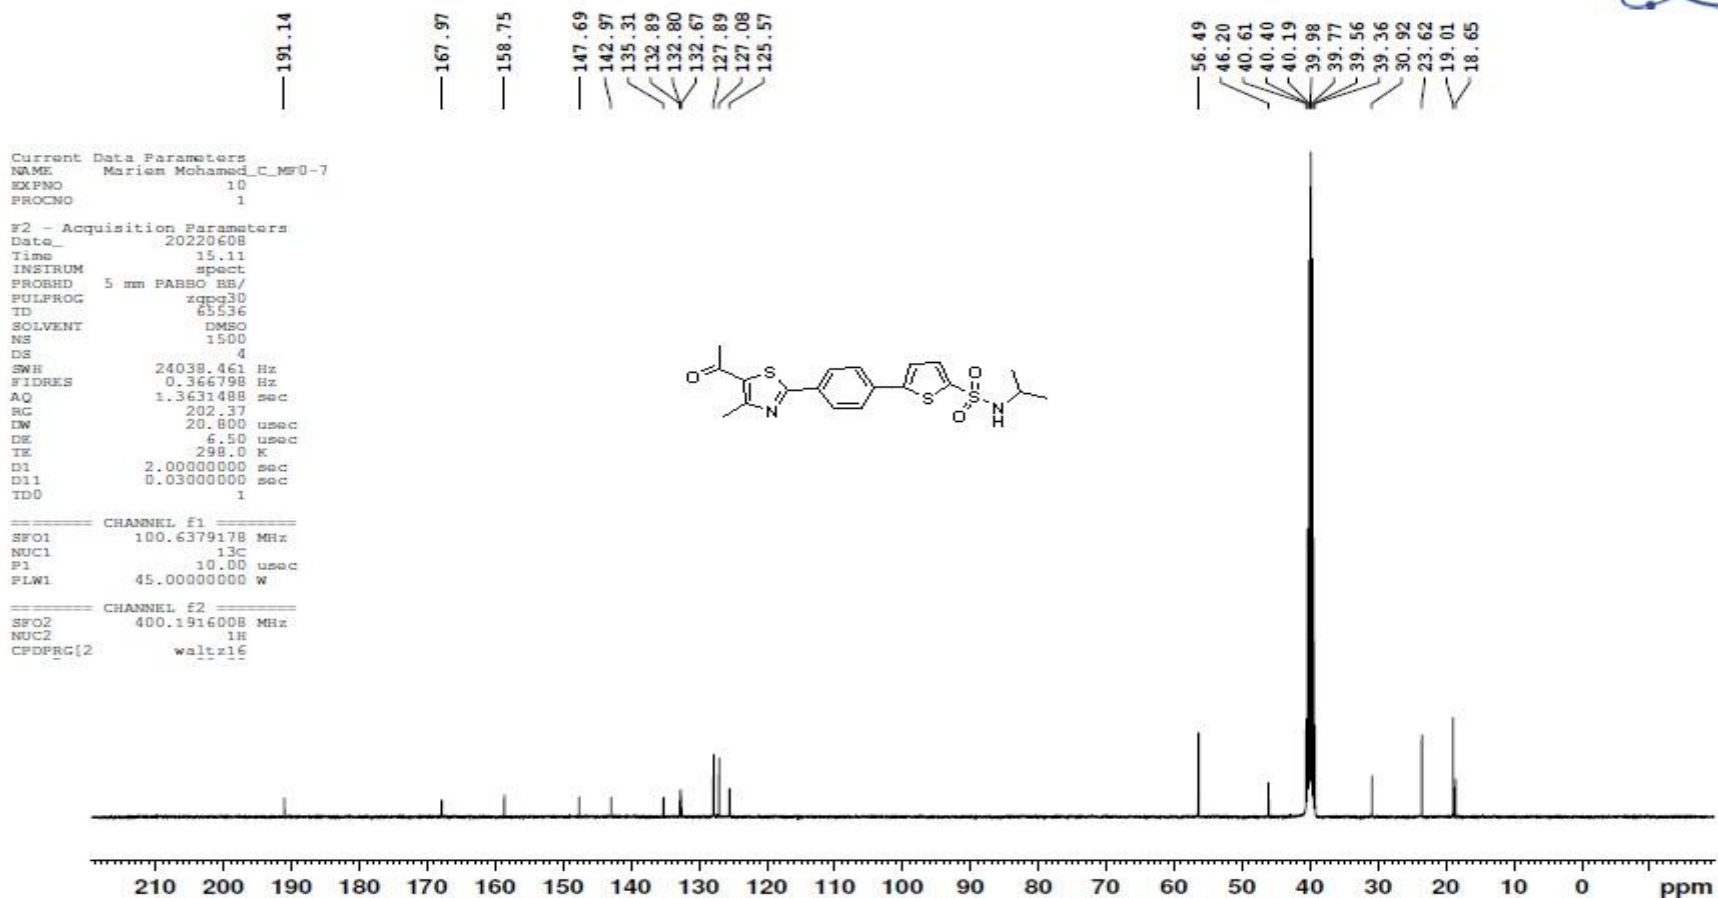

Mariam Mohamed\_H\_MF0-7-Ag

Microanalytical Unit - FOPCU - NMR laboratory  
www.pharma.cu.edu.eg dir-mau.fopcu@pharma.cu.edu.eg

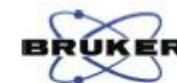

Current Data Parameters  
NAME: Mariem Mohamed\_H\_MF0-7-Ag  
EXPNO: 10  
PROCNO: 1  
F2 - Acquisition Parameters  
Date\_: 20220609  
Time: 15.17  
INSTRUM: spect  
PROBHD: 5 mm VAGG0 1H/1  
PULPROG: zgpg30  
TD: 65536  
SOLVENT: DMSO  
NS: 32  
DS: 2  
SWH: 8012.820 Hz  
FIDRES: 0.122266 Hz  
AQ: 4.0924465 sec  
RG: 146.06  
DM: 82.400 usec  
DE: 6.50 usec  
TE: 298.0 K  
SI: 1.0000000 sec  
TD0: 1  
----- CHANNEL f1 -----  
SF01: 400.1524713 MHz  
NUC1: 1H  
P1: 15.00 usec  
PLW1: 10.39999962 W  
F2 - Processing parameters  
SI: 65536  
SF: 400.1500000 MHz  
WDW: EM  
SSB: 0  
LB: 0.30 Hz  
GB: 0  
PC: 1.00

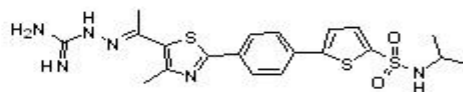

7.9732  
7.9522  
7.8402  
7.8192  
7.6611  
7.6513  
7.6059  
7.5972

5.8449  
5.7347

3.4329  
3.4166  
3.3999  
3.3735  
2.6035  
2.5910  
2.5084  
2.3192

1.0475  
1.0312

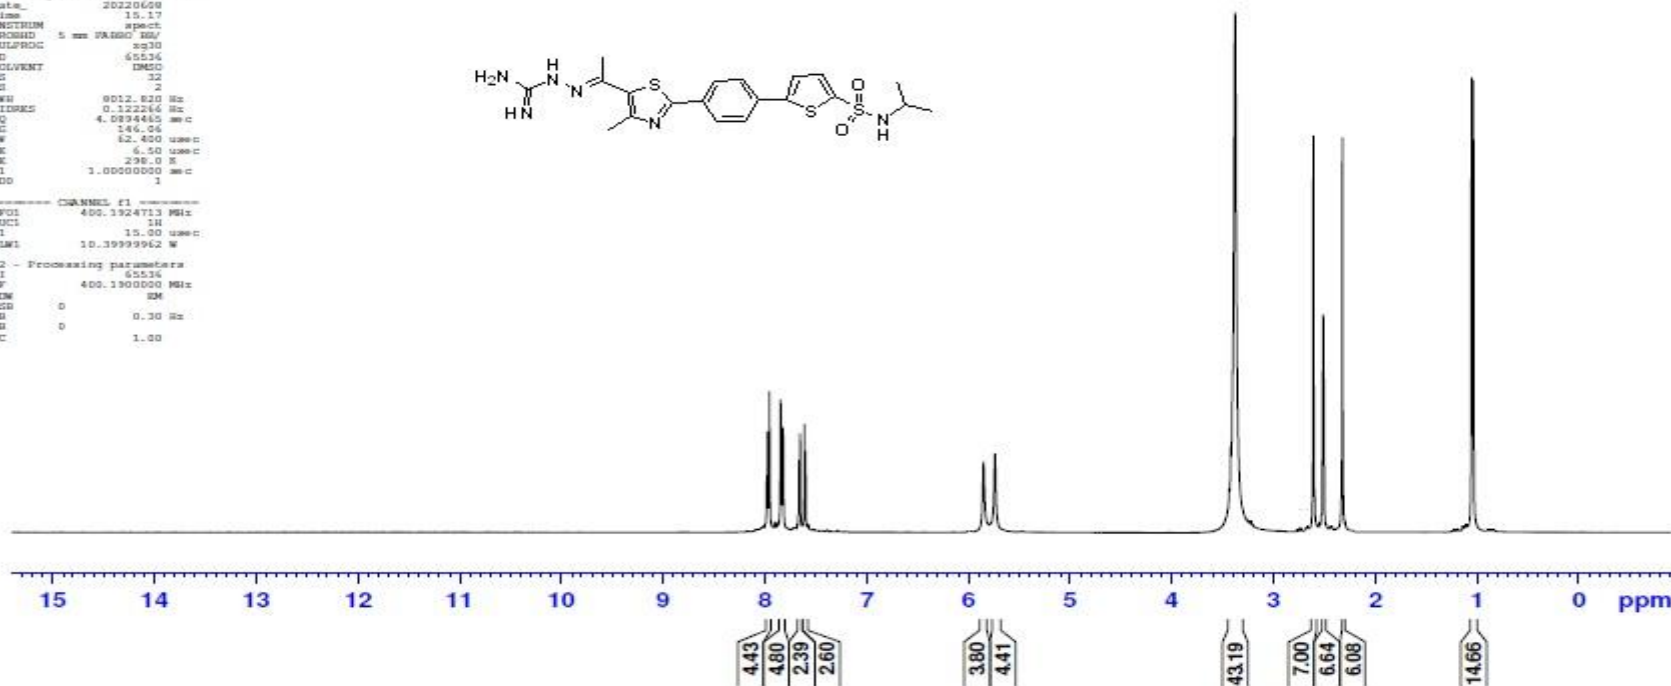

Mariam Mohamed\_C\_MF0-7-Ag

Microanalytical Unit - FOPCU - NMR laboratory  
www.pharma.cu.edu.eg dir-mau.fopcu@pharma.cu.edu.eg

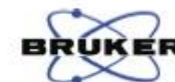

161.49  
160.32  
148.50  
148.15  
142.85  
142.37  
136.45  
133.86  
133.71  
132.81  
126.93  
124.99

46.19  
40.60  
40.39  
40.18  
39.97  
39.77  
39.56  
39.35  
23.62  
18.69  
16.49

Current Data Parameters  
NAME: Mariem Mohamed\_C\_MF0-7-  
EXPNO: 10  
PROCNO: 1

F2 - Acquisition Parameters  
Date\_: 20220608  
Time: 16.43  
INSTRUM: spect  
PROBHD: 5 mm PABBO BB/  
PULPROG: zgpg30  
TD: 65536  
SOLVENT: DMSO  
NS: 1500  
DS: 4  
SWH: 24038.461 Hz  
FIDRES: 0.366798 Hz  
AQ: 1.3631488 sec  
RG: 202.37  
IW: 20.800 usec  
DE: 6.50 usec  
TE: 298.1 K  
D1: 2.00000000 sec  
D11: 0.03000000 sec  
TD0: 1

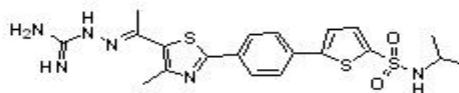

==== CHANNEL F1 =====  
SFO1 100.6379178 MHz  
NUC1 13C  
P1 10.00 usec  
PLW1 45.00000000 W  
==== CHANNEL F2 =====  
SFO2 400.1916008 MHz  
NUC2 1H  
CPDPRG[2] waltz16

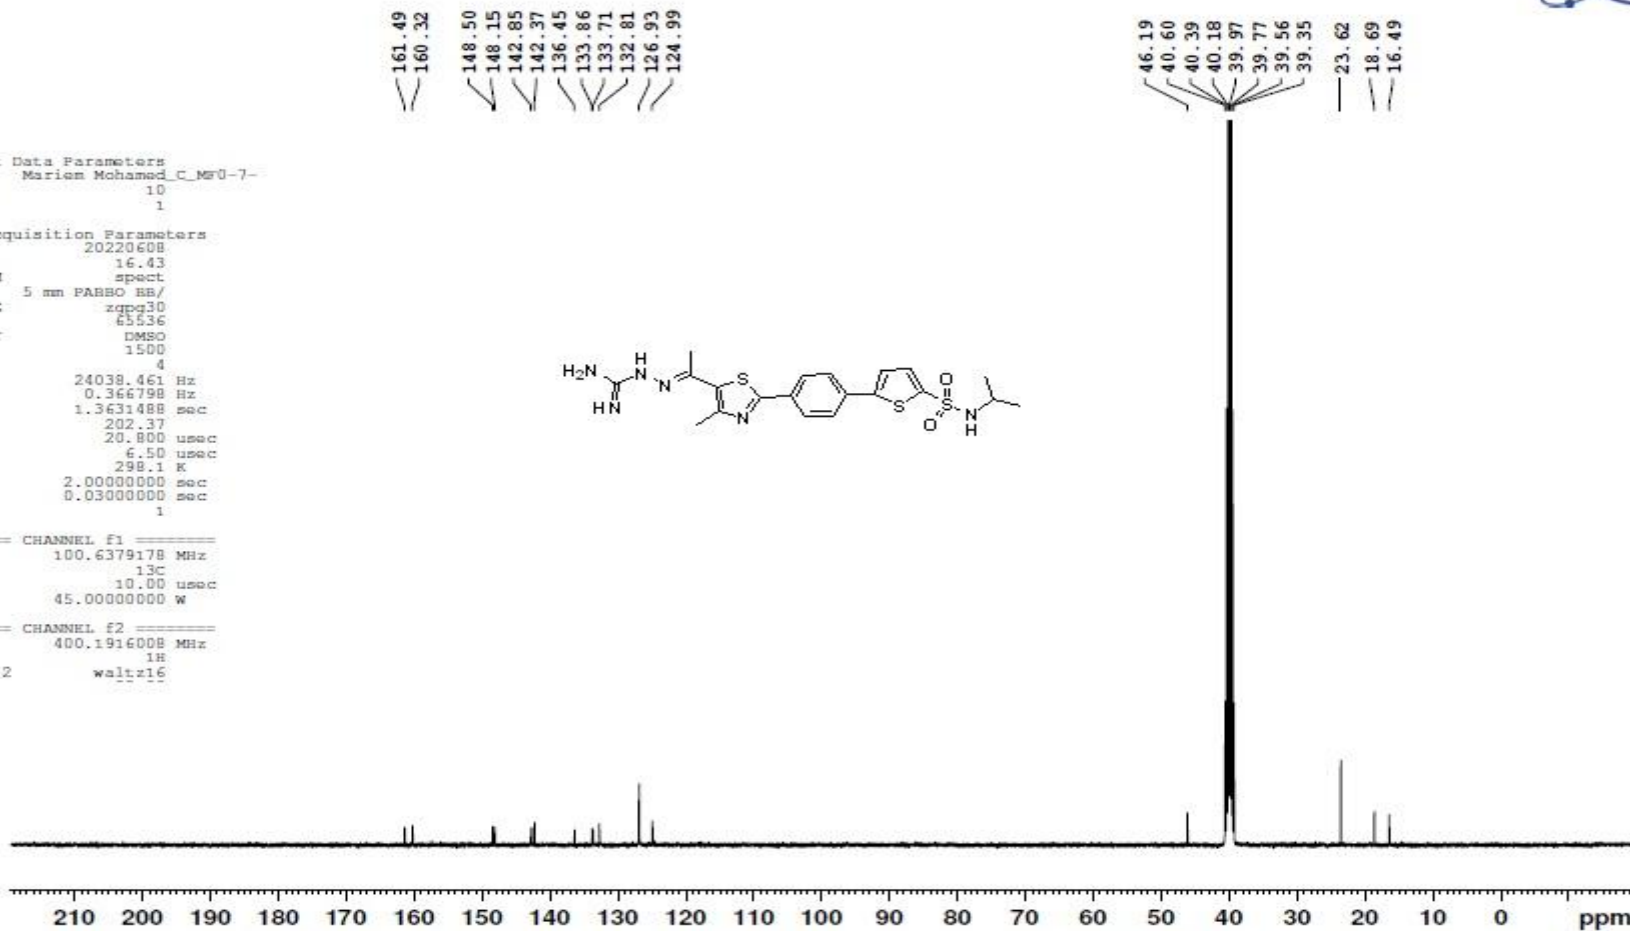

Mariam Mohamed\_H\_MF0-6

Microanalytical Unit - FOPCU - NMR laboratory  
www.pharma.cu.edu.eg dir-mau.fopcu@pharma.cu.edu.eg

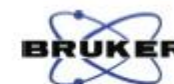

```

Current Data Parameters
NAME: Mariam Mohamed_H_MF0-6
EXPNO: 10
PROCNO: 1

F2 - Acquisition Parameters
Date_: 20220607
Time: 1.38
SPECTROM: spect
PROBHD: 5 mm PABBO BB/
PULPROG: zg30
TD: 65536
SOLVENT: DMSO
NS: 32
DS: 2
SWH: 8012.820 Hz
FIDRES: 0.122266 Hz
AQ: 4.0894465 sec
RG: 129.43
DM: 62.400 usec
DE: 6.50 usec
TE: 298.1 K
D1: 1.00000000 sec
TD0: 1

----- CHANNEL f1 -----
SFO1: 400.1924713 MHz
NUC1: 1H
P1: 15.00 usec
PL1: 10.39999962 W

F2 - Processing parameters
SI: 65536
SF: 400.1900000 MHz
WDW: EM
SSB: 0
LB: 0.30 Hz
GB: 0
PC: 1.00
    
```

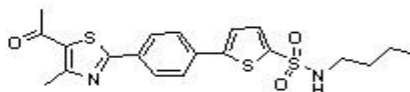

8.0724  
8.0512  
7.9253  
7.9110  
7.8955  
7.8891  
7.8678  
7.7127  
7.7029  
7.6141  
7.6043

3.3372  
2.9147  
2.8976  
2.8825  
2.8653  
2.7346  
2.7229  
2.5833  
2.5129  
2.5086  
2.5042  
1.4359  
1.4176  
1.3989  
1.3809  
1.3112  
1.2921  
1.2730  
1.2553  
0.8496  
0.8314  
0.8131

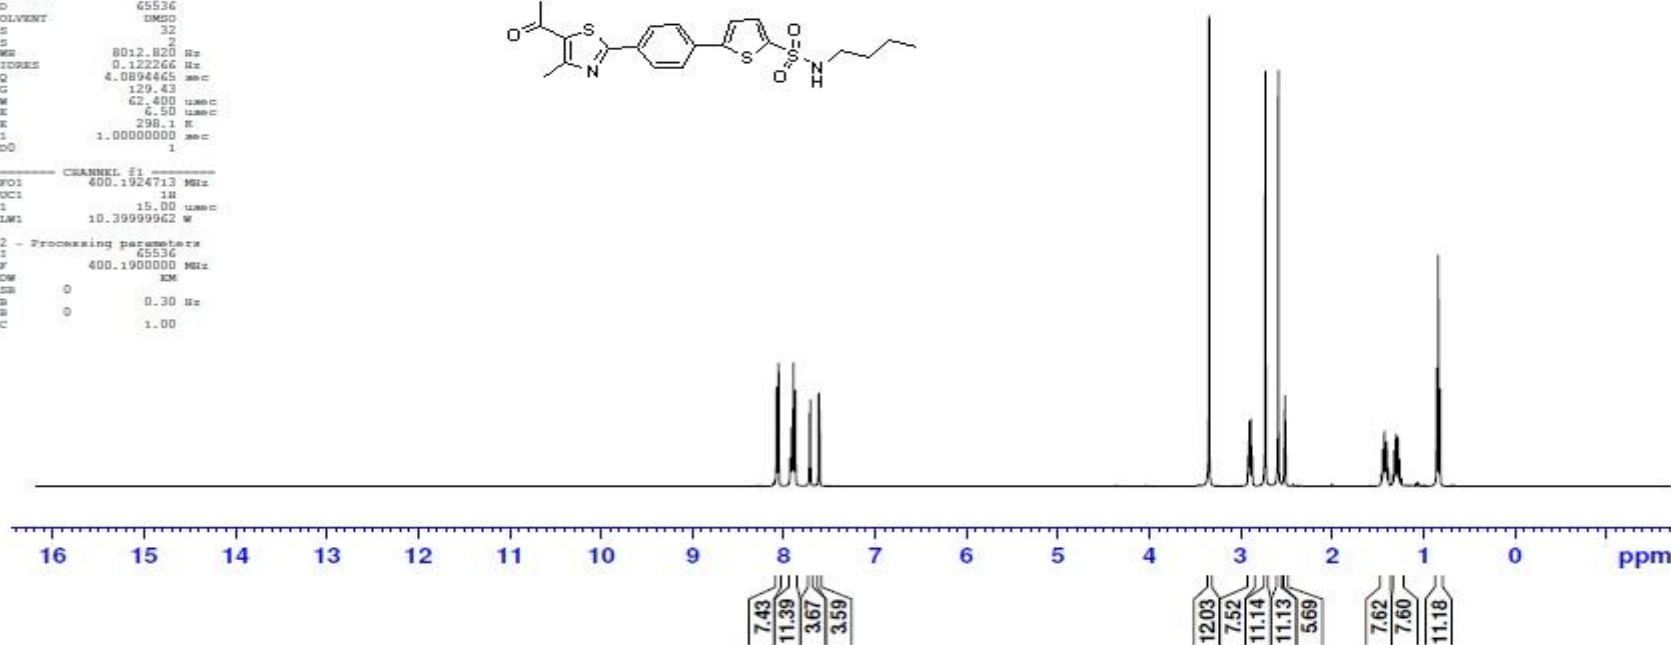

Mariam Mohamed\_C\_MF0-6

Microanalytical Unit - FOPCU - NMR laboratory  
www.pharma.cu.edu.eg dir-mau.fopcu@pharma.cu.edu.eg

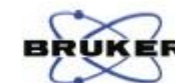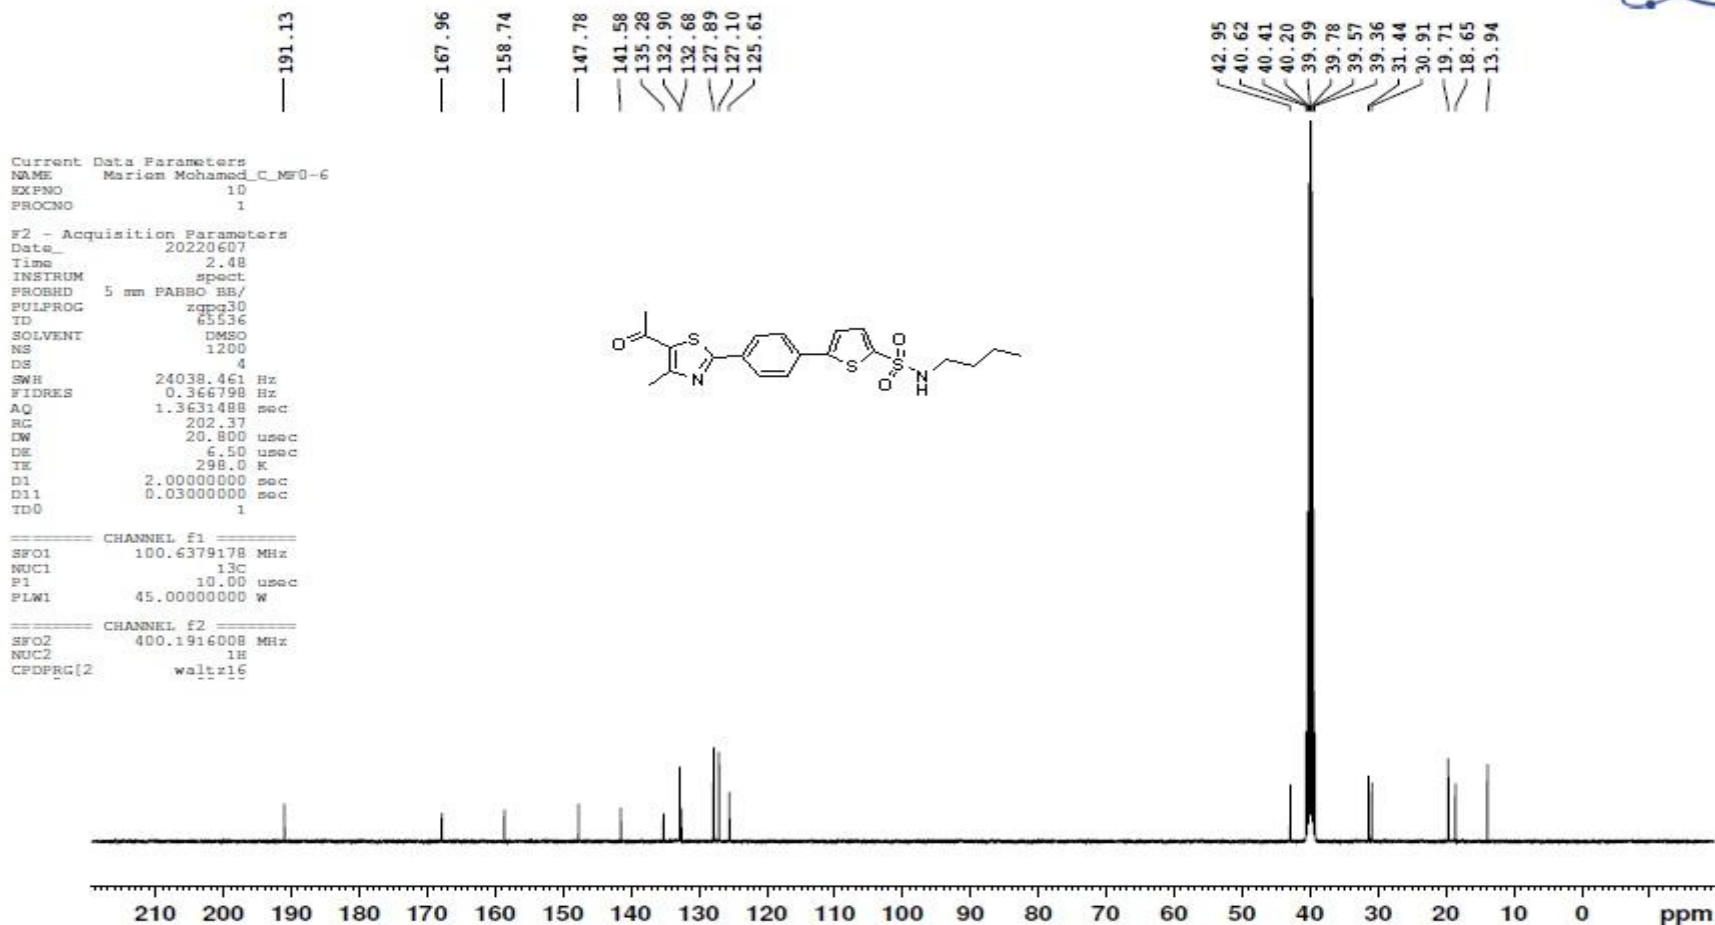

Mariam Mohamed\_H\_MF0-6-9Ag

Microanalytical Unit - FOPCU - NMR laboratory  
www.pharma.cu.edu.eg dir-mau.fopcu@pharma.cu.edu.eg

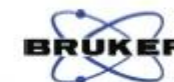

Current Data Parameters  
NAME: Mariam Mohamed\_H\_MF0-6-9Ag  
EXPNO: 10  
PROCNO: 1

F2 - Acquisition Parameters  
Date\_: 20220607  
Time: 2.53  
INSTRUM: spect  
PROBHD: 5 mm PABBO 507  
PULPROG: zg30  
TD: 65536  
SOLVENT: DMSO  
NS: 32  
DS: 2  
SWH: 8013.820 Hz  
FIDRES: 0.122266 Hz  
AQ: 4.0894650 sec  
RG: 146.05  
DF: 62.400 usec  
DE: 6.50 usec  
TE: 300.2 K  
DQ: 1.0000000 sec  
TD0: 1

===== CHANNEL F1 =====  
SF01: 400.1524712 MHz  
NUC1: 1H  
P1: 15.00 usec  
PLW1: 10.33000000 W

F2 - Processing parameters  
SI: 32768  
SF: 400.1500000 MHz  
WDW: EM  
SSB: 0  
LB: 0.30 Hz  
GB: 0  
PC: 1.00

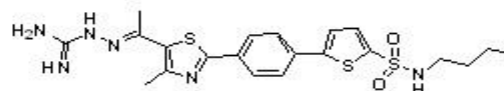

7.9789  
7.9580  
7.9012  
7.8863  
7.8716  
7.8448  
7.8239  
7.6704  
7.6608  
7.6021  
7.5925  
— 5.8651

3.3528  
2.9027  
2.8864  
2.8700  
2.6096  
2.5929  
2.5087  
2.3309  
1.4345  
1.4166  
1.3982  
1.3112  
1.2924  
1.2737  
1.2557  
0.8506  
0.8323  
0.8142

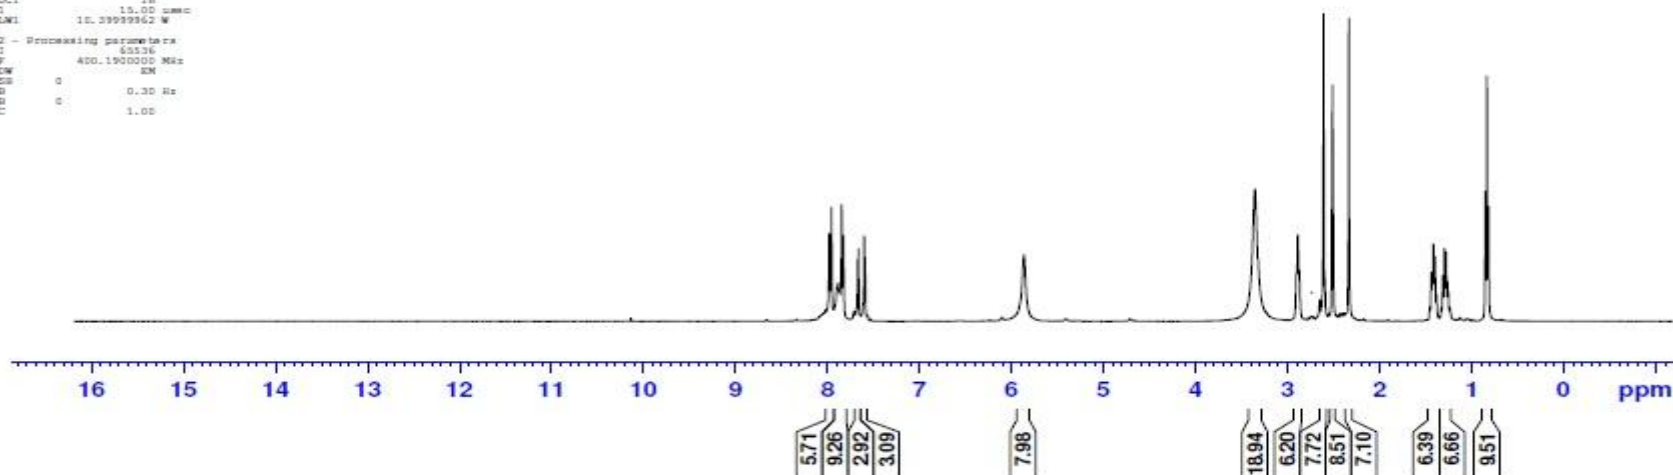

Mariam Mohamed\_C\_MF0-6-9Ag

Microanalytical Unit - FOPCU - NMR laboratory  
www.pharma.cu.edu.eg dir-mau.fopcu@pharma.cu.edu.eg

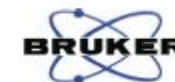

161.69  
159.99  
148.82  
148.26  
143.26  
141.01  
136.14  
133.84  
133.75  
132.91  
126.97  
125.04

42.95  
40.61  
40.40  
40.20  
39.99  
39.78  
39.57  
39.36  
31.43  
19.71  
18.69  
16.61  
13.95

Current Data Parameters  
NAME Mariem Mohamed\_C\_MF0-6-  
EXPNO 10  
PROCNO 1

F2 - Acquisition Parameters  
Date\_ 20220607  
Time 4.03  
INSTRUM spect  
PROBHD 5 mm PABBO BB/  
PULPROG zgpg30  
TD 65536  
SOLVENT DMSO  
NS 1200  
DS 4  
SWH 24038.461 Hz  
FIDRES 0.366798 Hz  
AQ 1.3631488 sec  
RG 202.37  
DW 20.800 usec  
DE 6.50 usec  
TE 298.1 K  
D1 2.0000000 sec  
D11 0.0300000 sec  
TD0 1

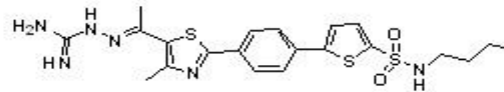

==== CHANNEL F1 =====  
SFO1 100.6379178 MHz  
NUC1 13C  
P1 10.00 usec  
PLW1 45.00000000 W  
  
==== CHANNEL F2 =====  
SFO2 400.1916008 MHz  
NUC2 1H  
CPDPRG2 waltz16

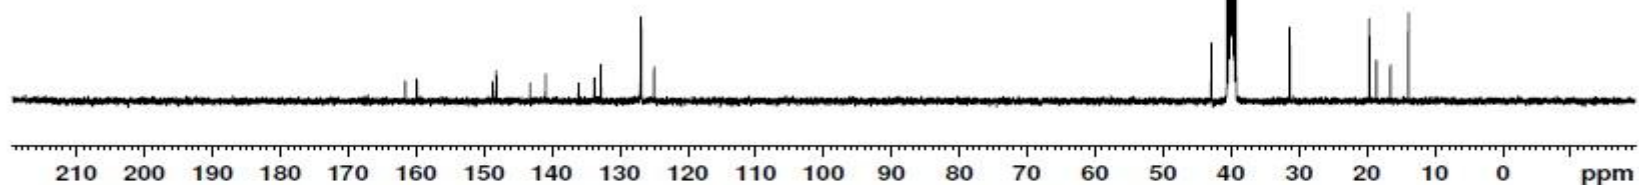

Mariam Mohamed\_H\_MF0-20

Microanalytical Unit - FOPCU - NMR laboratory  
www.pharma.cu.edu.eg dir-mau.fopcu@pharma.cu.edu.eg

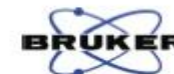

Current Data Parameters  
NAME Mariem Mohamed\_H\_MF0-20  
EXPNO 10  
PROCNO 1

F2 - Acquisition Parameters  
Date\_ 20220608  
Time 19.53  
INSTRUM spect  
PROBHD 5 mm PABBO BB/  
PULPROG zg30  
TD 65536  
SOLVENT DMSO  
NS 32  
DS 2  
SWH 8012.820 Hz  
FIDRES 0.122266 Hz  
AQ 4.0884405 sec  
RG 146.06  
SM 62.400 usec  
SE 6.50 usec  
TE 298.0 K  
SI 1.00000000 sec  
TIG 1

----- CHANNEL f1 -----  
SFO1 400.1924713 MHz  
NUC1 1H  
P1 15.00 usec  
PLW1 10.39999962 W

F2 - Processing parameters  
SI 65536  
SF 400.1900000 MHz  
WDW EM  
SSB 0  
LB 0.30 Hz  
GB 0  
PC 1.00

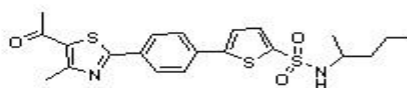

8.0806  
8.0594  
7.8955  
7.8787  
7.8744  
7.7064  
7.6966  
7.6122  
7.6024

3.3369  
3.3066  
3.2911  
3.2754  
3.2589  
3.2408  
3.2229  
3.2051  
2.7284  
2.5890  
2.5083  
1.3399  
1.3283  
1.3229  
1.3082  
1.2936  
1.2698  
1.2519  
1.2332  
1.2170  
0.9904  
0.9740  
0.7977

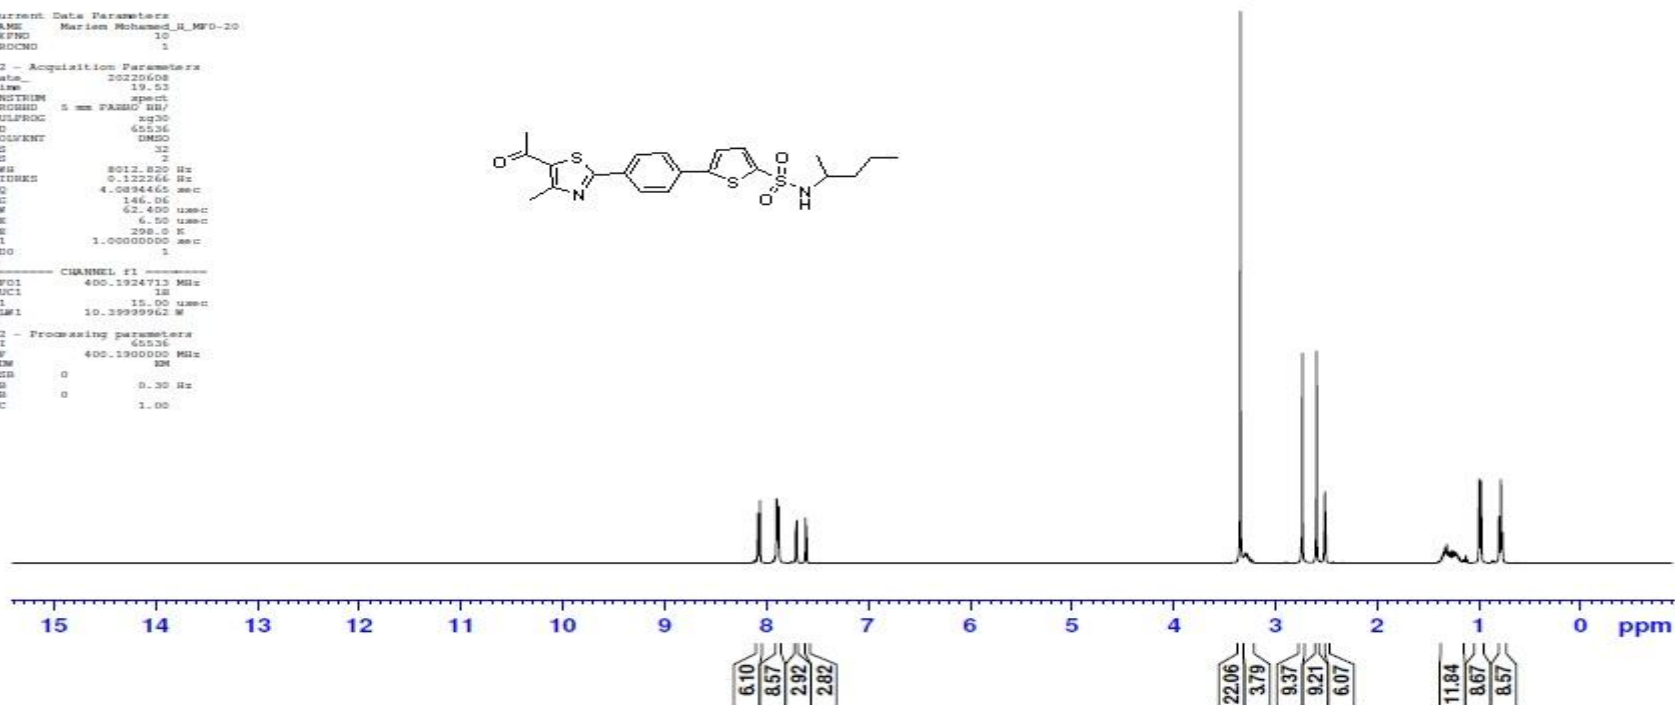



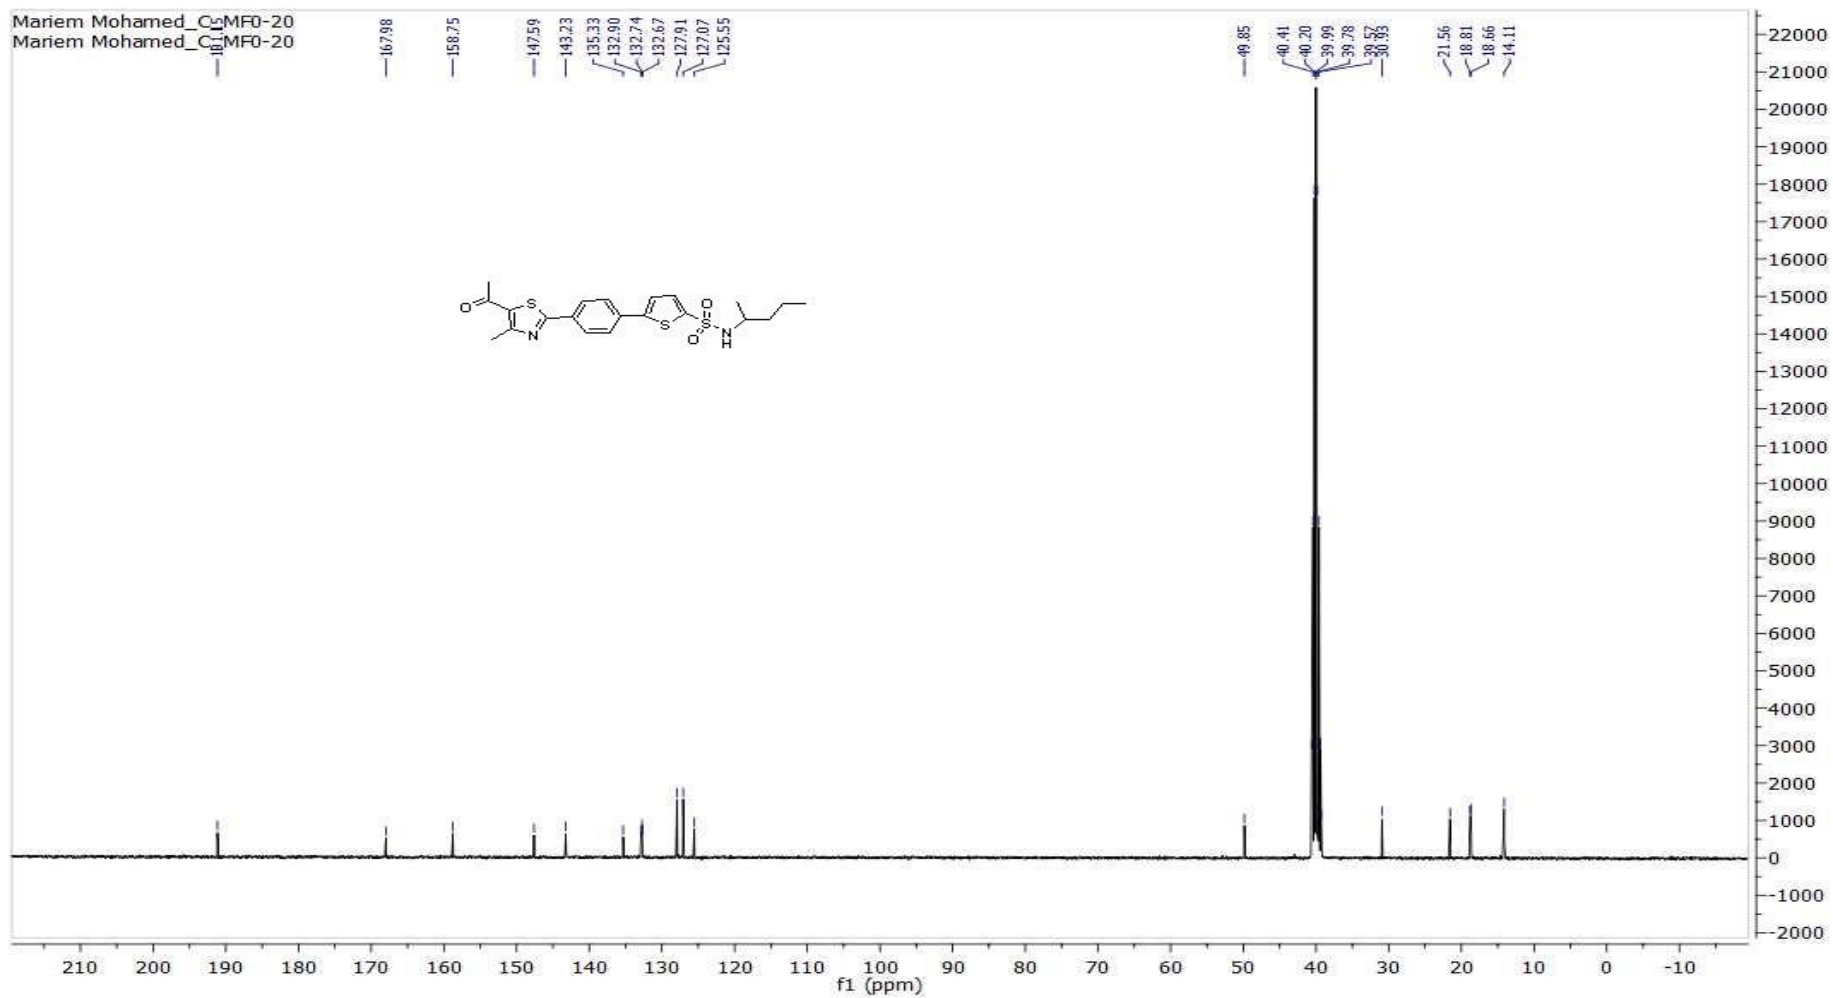

Mariam Mohamed\_H\_MF0-20-Ag

Microanalytical Unit - FOPCU - NMR laboratory  
www.pharma.cu.edu.eg dir-mau.fopcu@pharma.cu.edu.eg

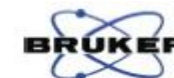

```

Current Data Parameters
NAME: Mariam Mohamed_H_MF0-20-Ag
EXPNO: 10
PROCNO: 1

F2 - Acquisition Parameters
Date_: 20220808
Time: 21.25
INSTRUM: spect
PROBHD: 5 mm HBBBO BB/
PULPROG: zg30
TD: 65536
SOLVENT: DMSO
NS: 32
DS: 2
SWH: 8012.820 Hz
FIDRES: 0.122264 Hz
AQ: 4.0894465 sec
RG: 14.93
SF: 81.405 MHz
DE: 6.50 cm/s
TE: 298.2 K
D1: 3.00000000 sec
TD0: 1

===== CHANNEL f1 =====
NUC1: 13C
P1: 15.00 usec
PL1: 0.00000000 W

F2 - Processing parameters
SI: 65536
SF: 400.1900000 MHz
WDW: EM
SSB: 0
GB: 0
PC: 1.00
    
```

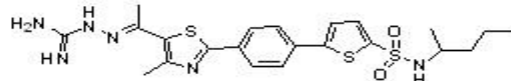

7.9735  
7.9533  
7.8372  
7.8170  
7.6511  
7.6426  
7.5943  
7.5858

5.8325

3.3730  
3.2851  
2.6076  
2.5087  
2.3284  
1.3367  
1.3203  
1.3050  
1.2907  
1.2695  
1.2504  
1.2326  
1.2184  
0.9869  
0.9711  
0.7962  
0.7786  
0.7630

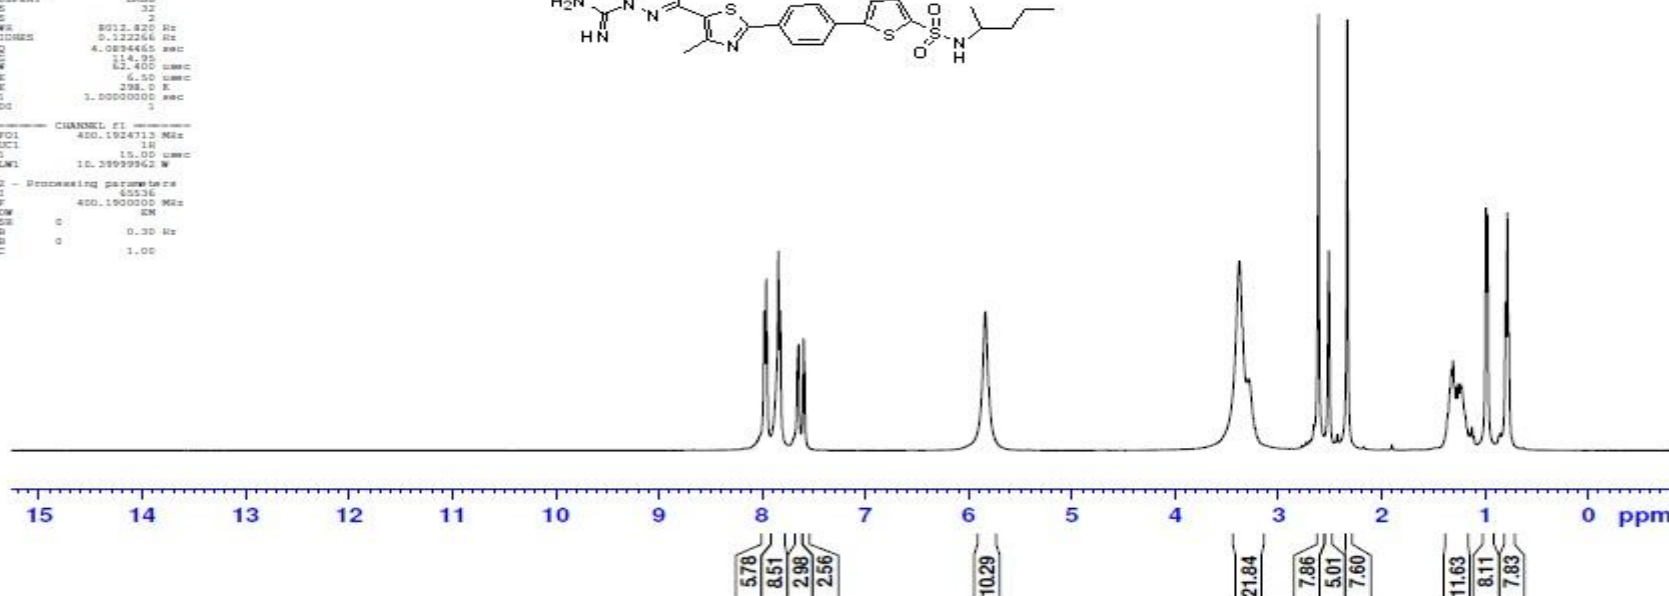

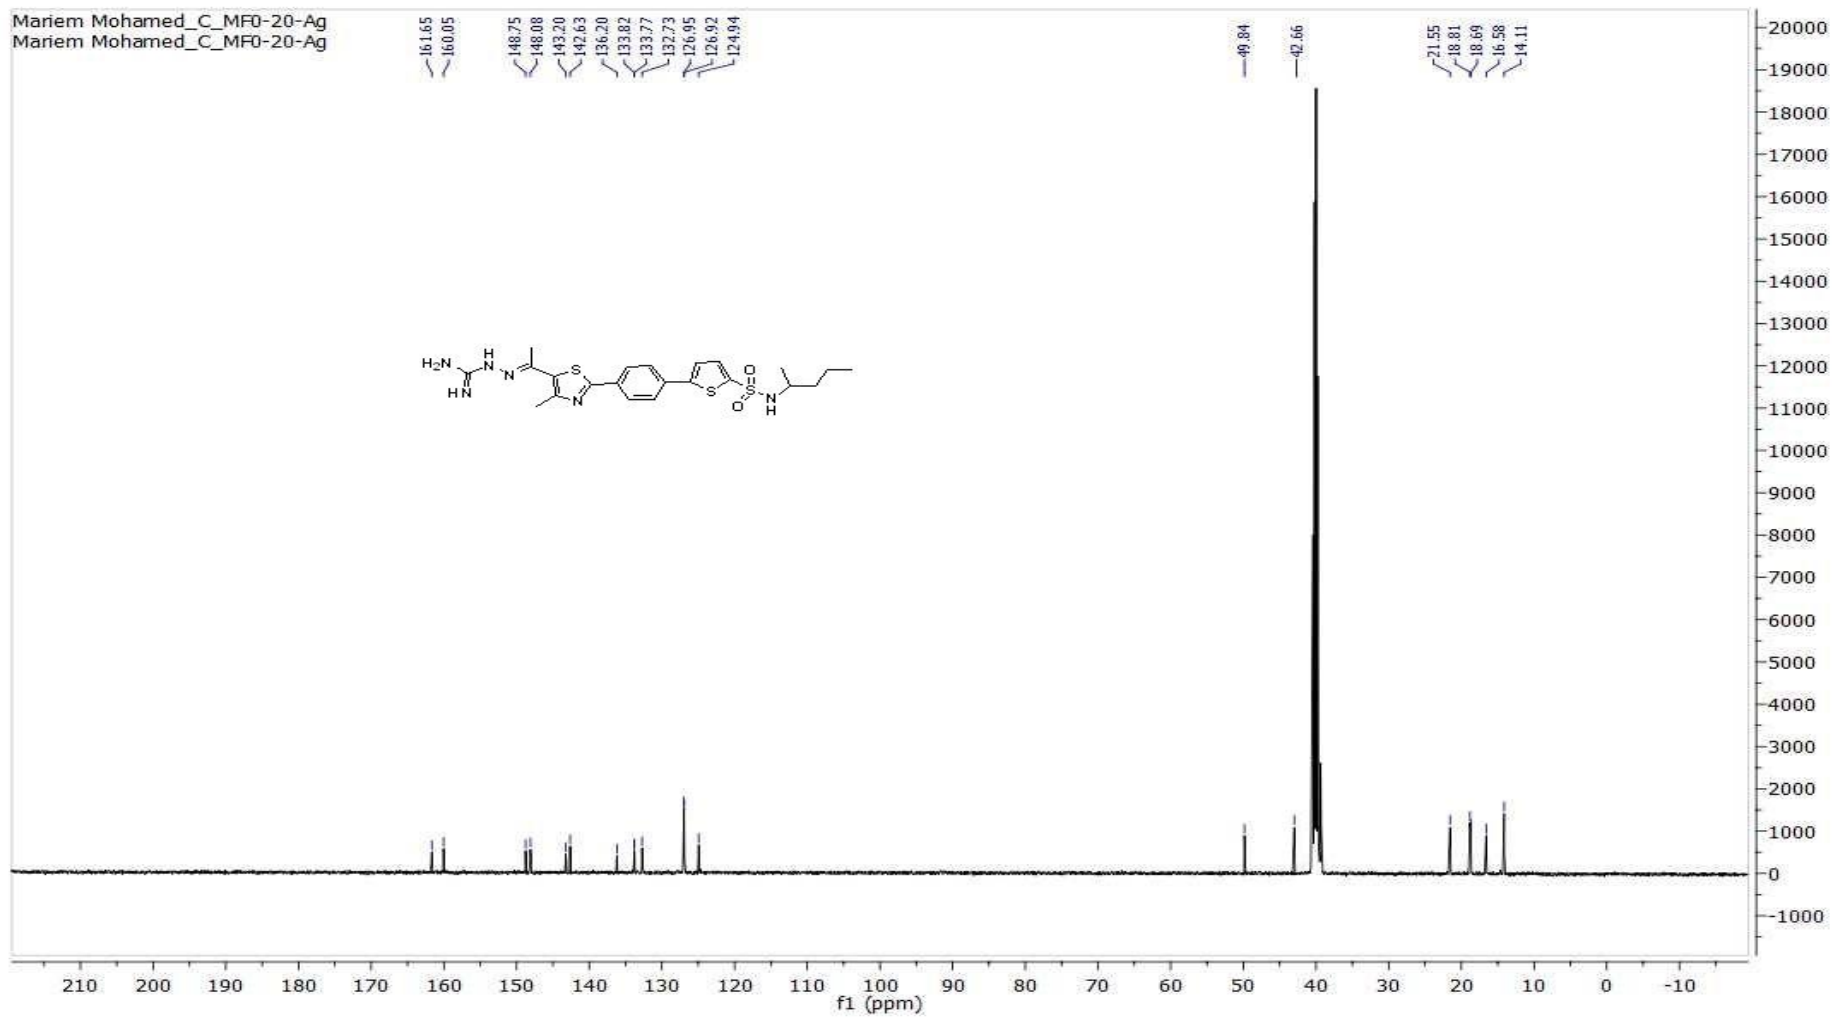

Mariam Mohamed\_H\_MF0-21

Microanalytical Unit - FOPCU - NMR laboratory  
www.pharma.cu.edu.eg dir-mau.fopcu@pharma.cu.edu.eg

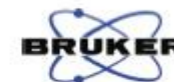

```
Current Data Parameters
NAME: Mariam Mohamed_H_MF0-21
EXPNO: 10
PROCNO: 1

F2 - Acquisition Parameters
Date_: 20220608
Time: 22:57
INSTRUM: spect
PROBHD: 5 mm PABBO BB/
PULPROG: zg30
TD: 65536
SOLVENT: DMSO
NS: 32
DS: 1
SWH: 8012.820 Hz
FIDRES: 0.122266 Hz
AQ: 4.0094465 sec
RG: 114.95
SM: 62.400 usec
SE: 6.50 usec
TR: 298.0 N
D1: 1.0000000 sec
TD0: 1

===== CHANNEL f1 =====
NUC1: 13C
P1: 15.00 usec
PSM1: 10.39999962 W

F2 - Processing parameters
SI: 65536
SF: 400.1300000 MHz
WDW: EM
SSB: 0
LB: 0.30 Hz
GB: 0
PC: 1.00
```

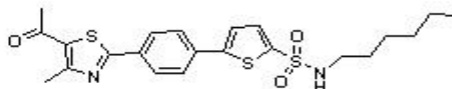

8.0682  
8.0470  
7.9209  
7.9068  
7.8922  
7.8824  
7.8612  
7.7073  
7.6975  
7.6090  
7.5992

3.3405  
2.9085  
2.8914  
2.8765  
2.8594  
2.7200  
2.5804  
2.5084  
1.4510  
1.4343  
1.4164  
1.3982  
1.3803  
1.2833  
1.2656  
1.2481  
1.2308  
1.2285  
1.2137  
1.2012  
1.1954  
1.1751

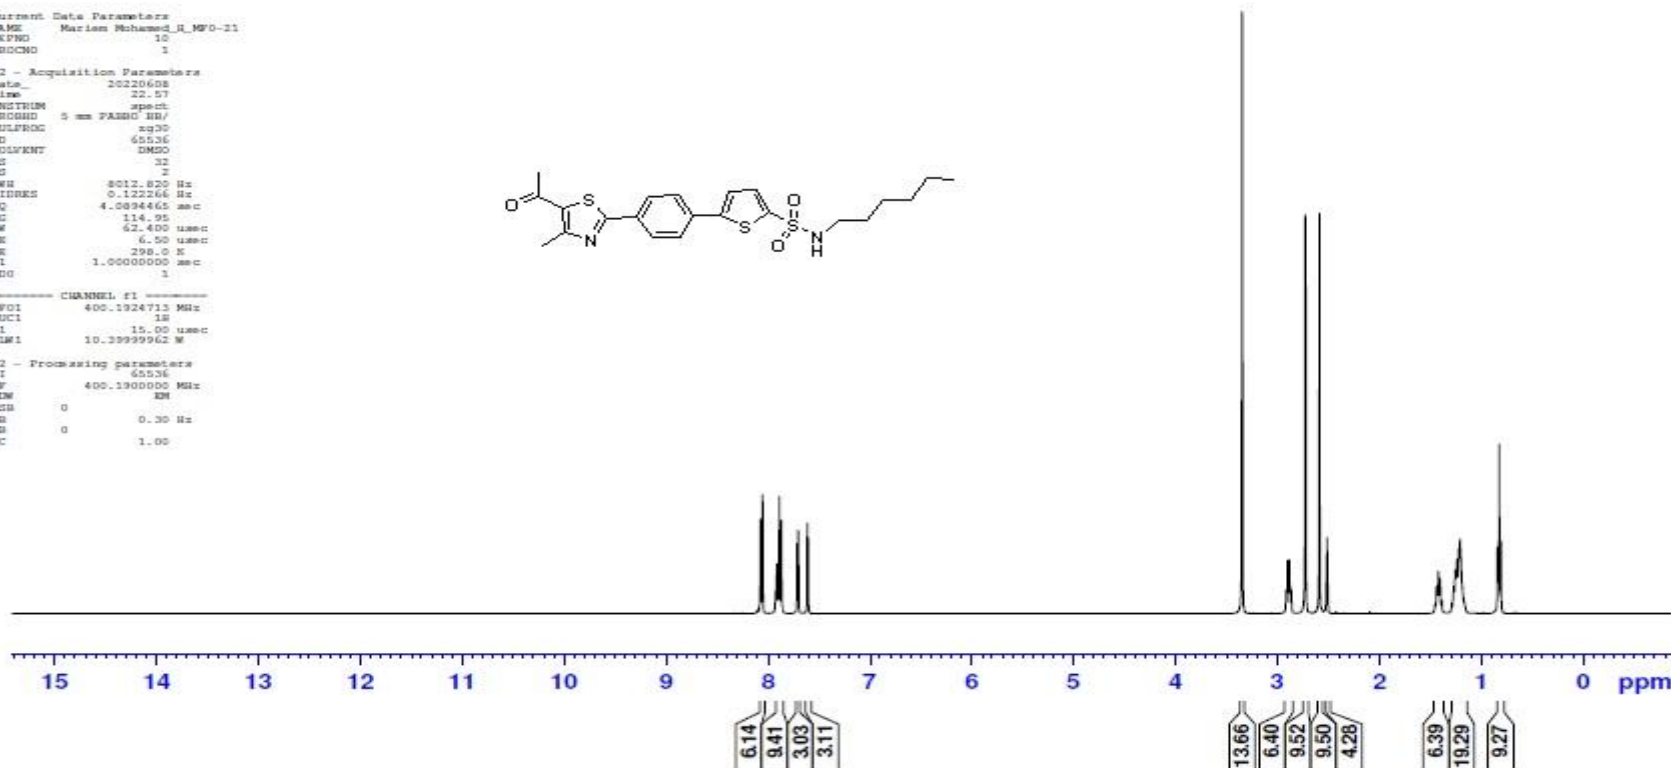

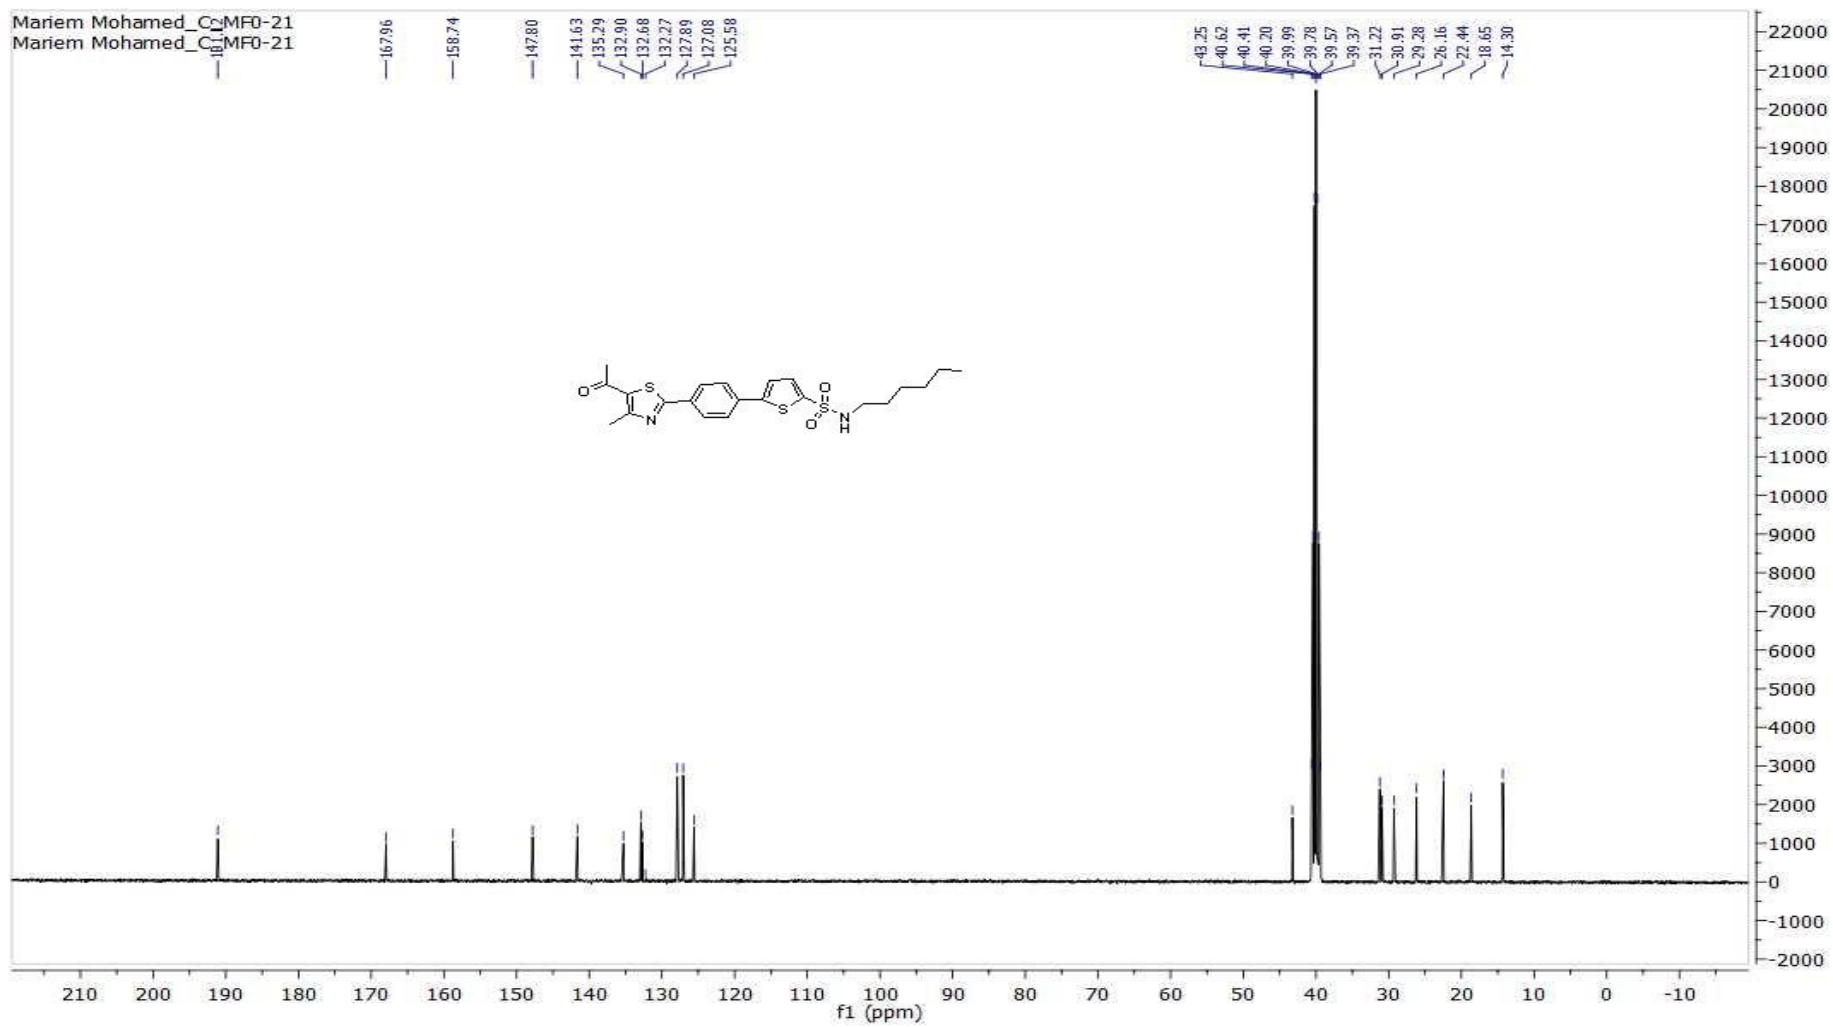

Mariem Mohamed\_H\_MF0-21-Ag

Microanalytical Unit - FOPCU - NMR laboratory  
www.pharma.cu.edu.eg dir-mau.fopcu@pharma.cu.edu.eg

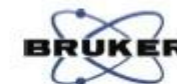

7.9739  
7.9528  
7.8896  
7.8689  
7.8345  
7.8134  
7.6608  
7.6511  
7.5953  
7.5856  
5.7976  
5.7108  
3.3815  
2.8964  
2.8790  
2.8616  
2.7257  
2.6051  
2.5853  
2.5083  
2.3231  
1.4318  
1.4141  
1.3960  
1.3781  
1.2821  
1.2642  
1.2478  
1.2312  
1.2284  
1.2137  
1.2009  
1.1956  
1.1759

```

Current Data Parameters
NAME: Mariem Mohamed_H_MF0-21-Ag
EXPNO: 10
PROCNO: 1

F2 - Acquisition Parameters
Date_: 20220814
Time: 15.36
INSTRUM: spect
PROBHD: 5 mm BBOBO 507
PULPROG: zg30
TD: 65536
SOLVENT: DMSO
RG: 32
DS: 2
SWH: 8012.820 Hz
FIDRES: 0.122266 Hz
AQ: 4.0934465 sec
RG: 31.25
AQ: 61.405 usec
DE: 6.50 usec
TE: 298.2 K
SI: 1.00000000 sec
TD0: 1

===== CHANNEL f1 =====
SFO1: 400.1504713 MHz
NUC1: 13
P1: 15.00 usec
PL1: 10.33999962 M

F2 - Processing parameters
SI: 65536
SF: 400.1500000 MHz
WDW: EM
SSB: 0
LB: 0.30 Hz
GB: 0
PC: 1.00
    
```

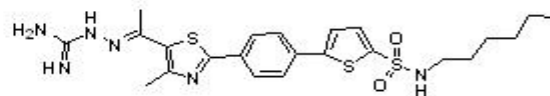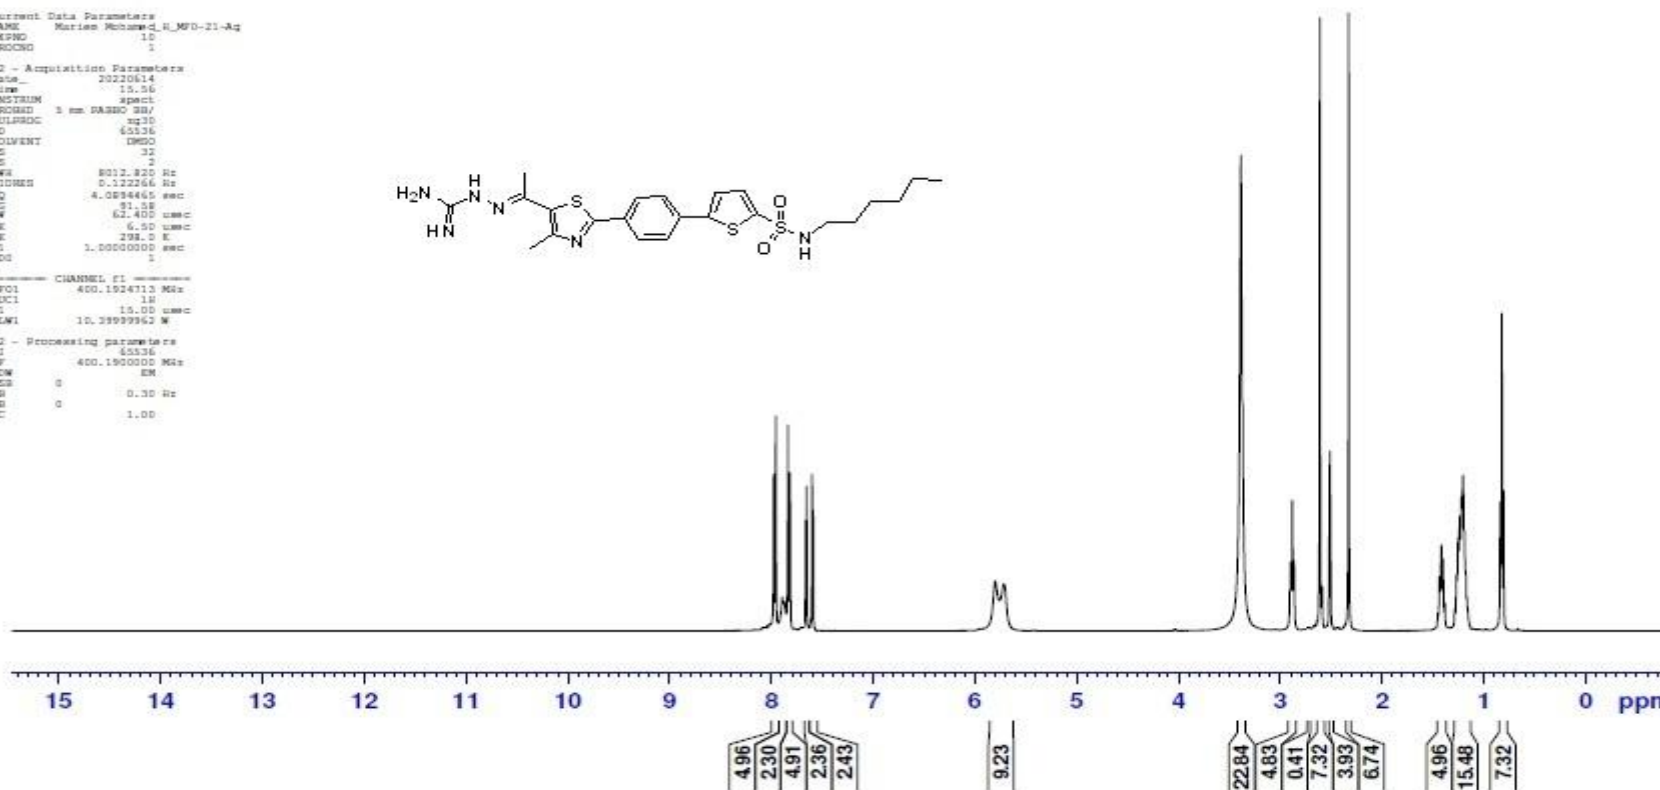

Mariam Mohamed\_C\_MF0-21-Ag

Microanalytical Unit - FOPCU - NMR laboratory  
www.pharma.cu.edu.eg dir-mau.fopcu@pharma.cu.edu.eg

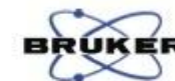

161.55  
160.20  
148.59  
148.29  
143.03  
141.03  
136.38  
133.87  
133.71  
132.92  
126.98  
126.94  
124.99

43.25  
40.60  
40.39  
40.18  
39.97  
39.76  
39.56  
39.35  
31.22  
29.27  
26.16  
22.44  
18.69  
16.51  
14.31

Current Data Parameters  
NAME Mariam Mohamed\_C\_MF0-21  
EXPNO 10  
PROCNO 1

F2 - Acquisition Parameters  
Date\_ 20220614  
Time 17.23  
INSTRUM spect  
PROBHD 5 mm PABBO BB/  
PULPROG zgpg30  
TD 65536  
SOLVENT DMSO  
NS 1500  
DS 4  
SWH 24038.461 Hz  
FIDRES 0.364798 Hz  
AQ 1.3631488 sec  
RG 202.37  
LW 20.800 usec  
DE 6.50 usec  
TE 298.0 K  
D1 2.00000000 sec  
D11 0.03000000 sec  
TD0 1

==== CHANNEL F1  
SFO1 100.6379178 MHz  
NUC1 13C  
P1 10.00 usec  
PLW1 45.00000000 W  
  
==== CHANNEL F2  
SFO2 400.1916008 MHz  
NUC2 1H  
CPDPRG[2] waltz16

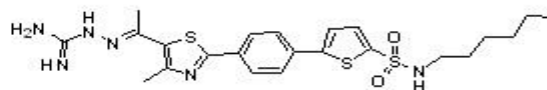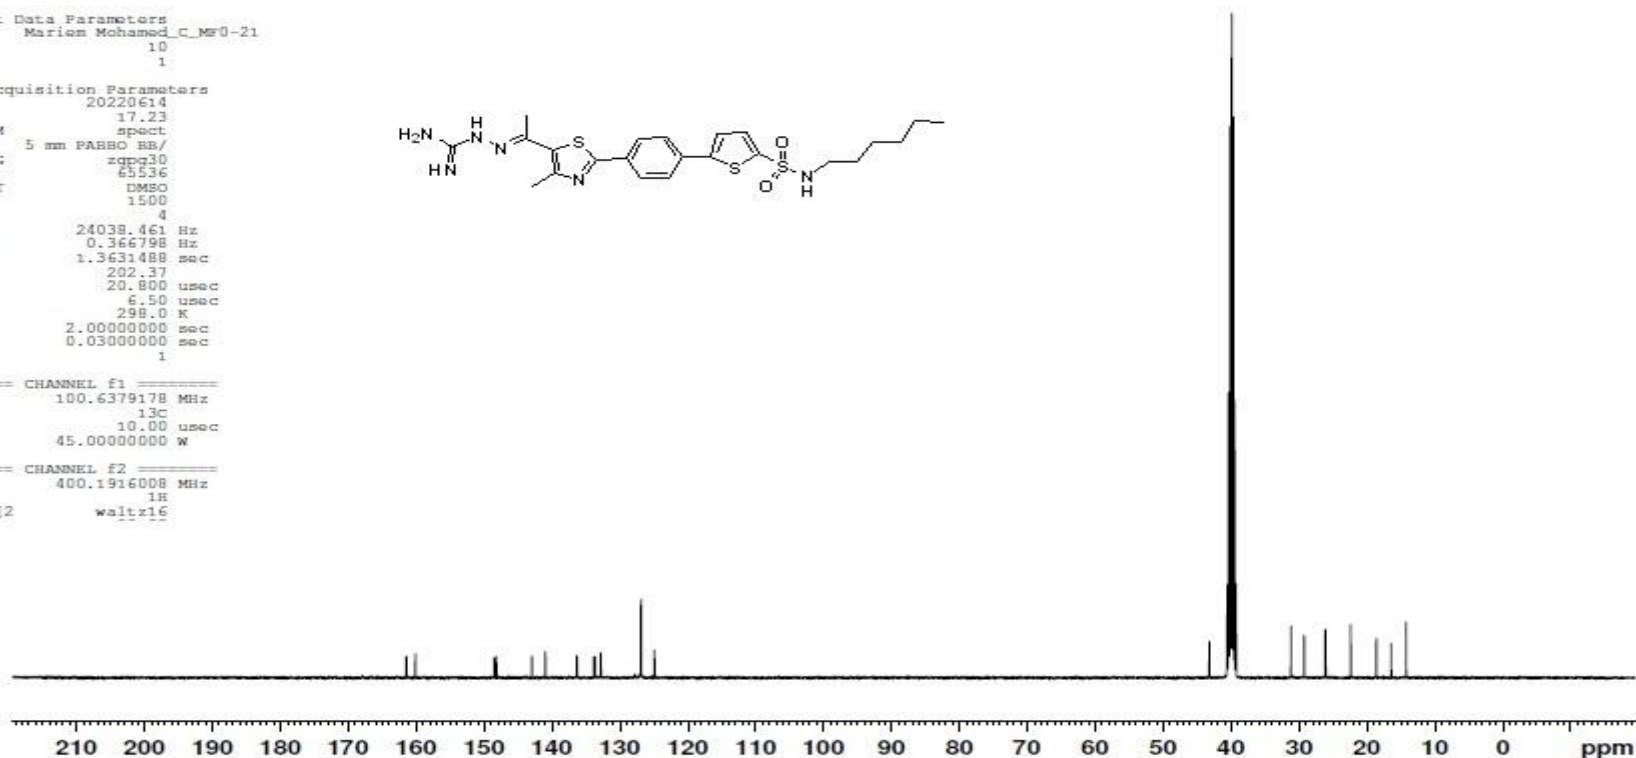

Mariam Mohamed\_H\_MF0-1

Microanalytical Unit - FOPCU - NMR laboratory  
www.pharma.cu.edu.eg dir-mau.fopcu@pharma.cu.edu.eg

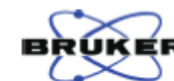

```
Current Data Parameters
NAME      Mariem Mohamed_H_MF0-1
EXPNO    10
PROCNO   1

F2 - Acquisition Parameters
Date_    20220606
Time     20.39
INSTRUM  spect
PROBHD   5 mm PABBO BBI/
PULPROG  zg30
TD       65536
SOLVENT  DMSO
NS       32
DS       2
SWH      8012.820 Hz
FIDRES   0.122266 Hz
AQ       4.0894465 sec
RG       129.43
DM       62.400 usec
DE       6.50 usec
TE       298.1 K
D1       1.0000000 sec
TD0      1

----- CHANNEL f1 -----
SFO1     400.1924713 MHz
NUC1      1H
P1       15.00 usec
PLM1     10.39999962 W

F2 - Processing parameters
SI       65536
SF       400.1900000 MHz
WDW      EM
SSB      0
LB       0.30 Hz
GB       0
PC       1.00
```

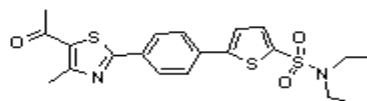

8.0672  
8.0459  
7.9004  
7.8792  
7.7480  
7.7381  
7.6947  
7.6848

3.3355  
3.2576  
3.2399  
3.2221  
3.2043  
2.7214  
2.5825  
2.5087  
1.1421  
1.1244  
1.1065

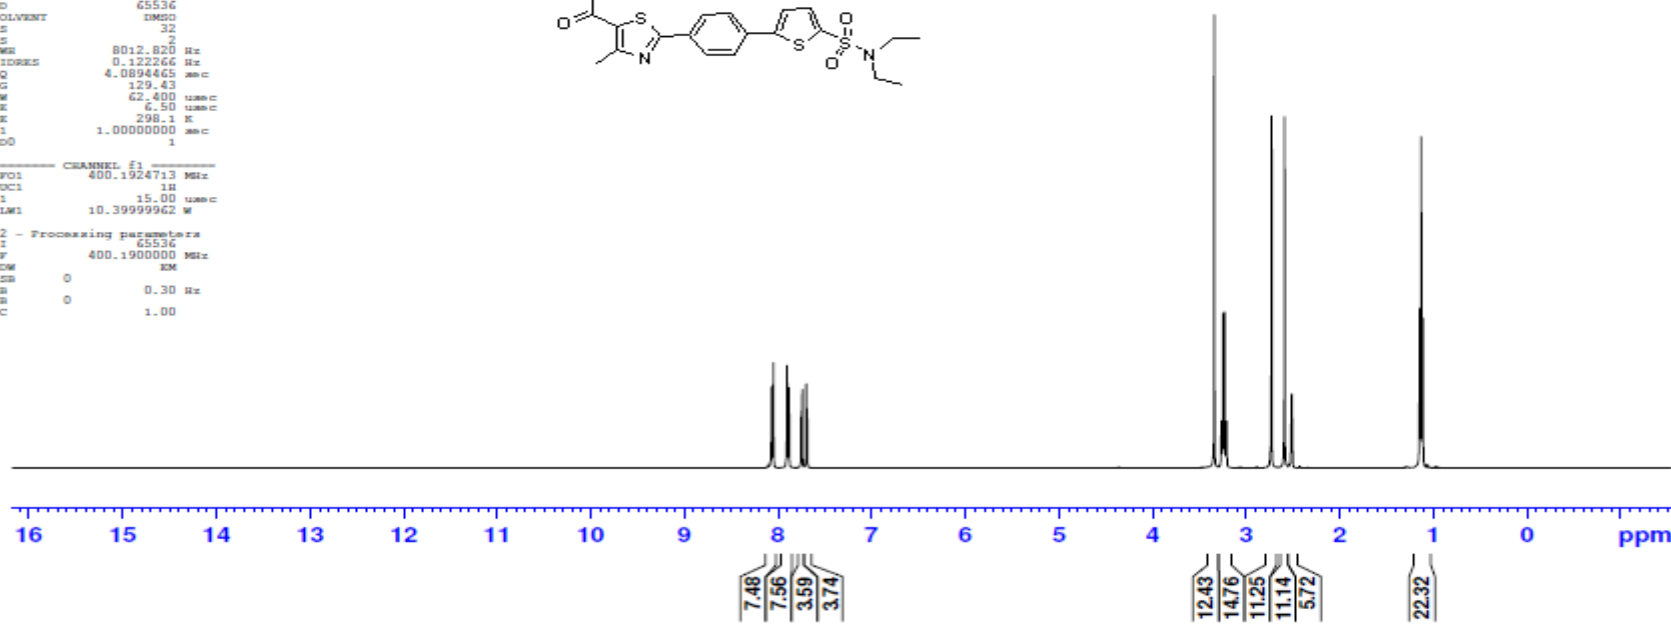



Mariam Mohamed\_C\_MF0-1

Microanalytical Unit - FOPCU - NMR laboratory  
www.pharma.cu.edu.eg dir-mau.fopcu@pharma.cu.edu.eg

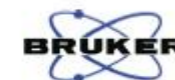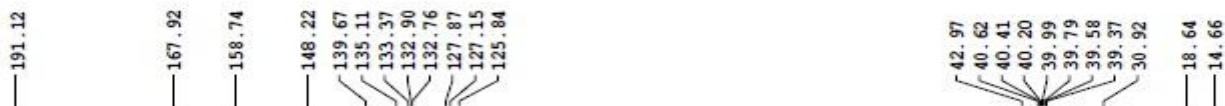

Current Data Parameters  
NAME Mariem Mohamed\_C\_MF0-1  
EXPNO 10  
PROCNO 1

F2 - Acquisition Parameters  
Date\_ 20220606  
Time 21.48  
INSTRUM spect  
PROBHD 5 mm PABBO BB/  
PULPROG zgpg30  
TD 65536  
SOLVENT DMSO  
NS 1200  
DS 4  
SWH 24038.461 Hz  
FIDRES 0.366798 Hz  
AQ 1.3631488 sec  
RG 202.37  
LW 20.800 usec  
DE 6.50 usec  
TE 298.1 K  
D1 2.00000000 sec  
D11 0.03000000 sec  
TDD 1

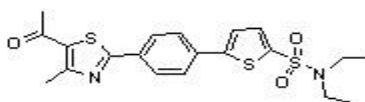

==== CHANNEL F1 =====  
SFO1 100.6379178 MHz  
NUC1 13C  
P1 10.00 usec  
PLW1 45.00000000 W  
  
==== CHANNEL F2 =====  
SFO2 400.1916008 MHz  
NUC2 1H  
CPDPRG[2] waltz16

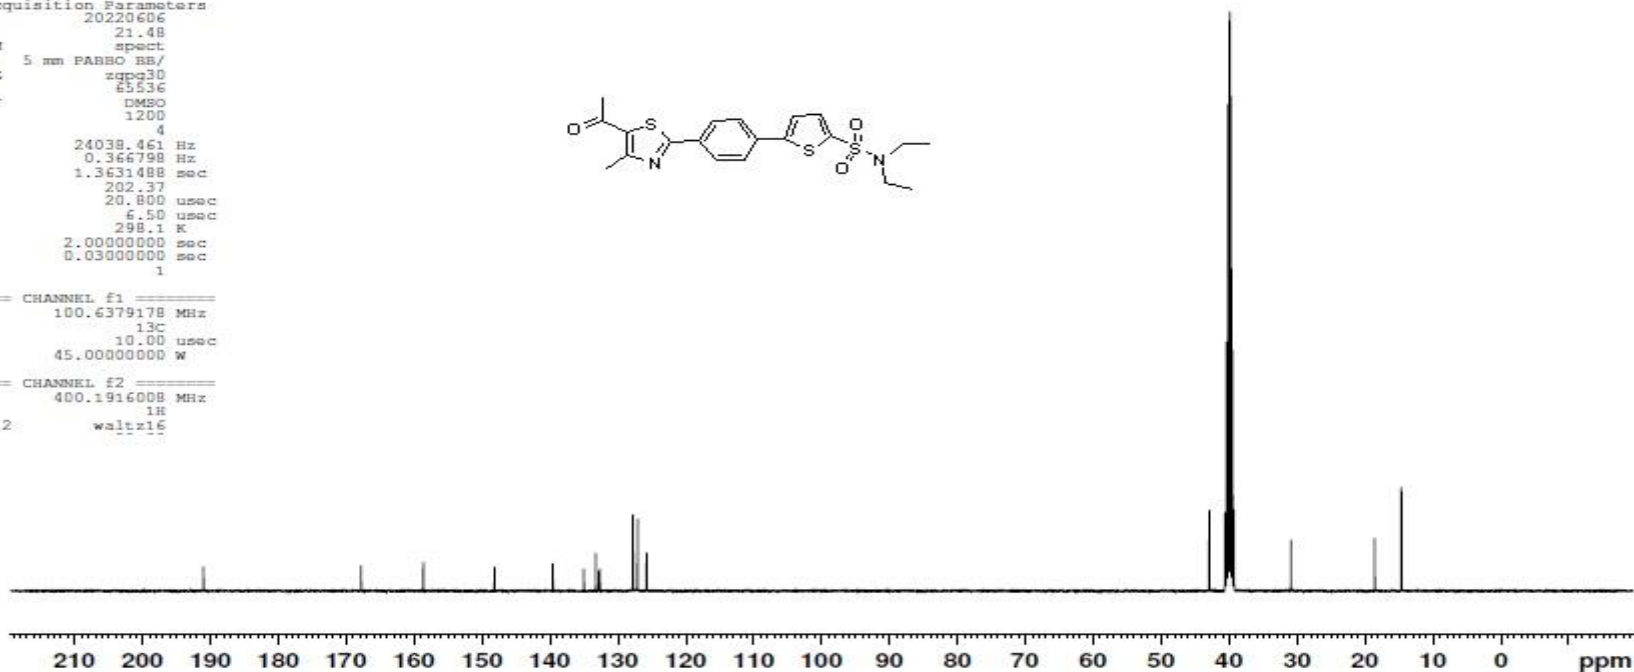

Mariam Mohamed\_H\_MF0-1-Ag

Microanalytical Unit - FOPCU - NMR laboratory  
 www.pharma.cu.edu.eg dir-mau.fopcu@pharma.cu.edu.eg

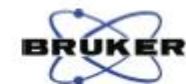

```

Current Data Parameters
NAME: Mariem Mohamed_H_MF0-1-Ag
EXPNO: 10
PROCNO: 1

F2 - Acquisition Parameters
Date_: 20220606
Time: 21.54
INSTRUM: spect
PROBHD: 5 mm VAMBO 500
PULPROG: zg30
TD: 65536
SOLVENT: DMSO
NS: 32
DS: 2
SWH: 8012.820 Hz
FIDRES: 0.122266 Hz
AQ: 4.0894465 sec
RG: 129.43
CW: 62.400 usec
CK: 6.50 usec
TK: 298.0 K
C1: 1.00000000 sec
TDD: 1

----- CHANNEL f1 -----
NUC1: 400.1524713 MHz
P1: 15.00 usec
PL1: 10.39999962 W

F2 - Processing parameters
SI: 65536
SF: 400.1500000 MHz
WDW: RM
SSB: 0
LB: 0.30 Hz
GB: 0
PC: 1.00
  
```

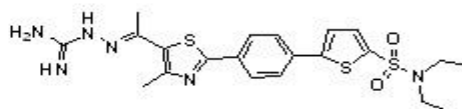

7.9734  
 7.9527  
 7.8550  
 7.8344  
 7.7035  
 7.6942  
 7.6791  
 7.6697

5.7875  
 5.7017

3.3447  
 3.2530  
 3.2355  
 3.2178  
 3.2004  
 2.6070  
 2.5087  
 2.3245

1.1394  
 1.1219  
 1.1043

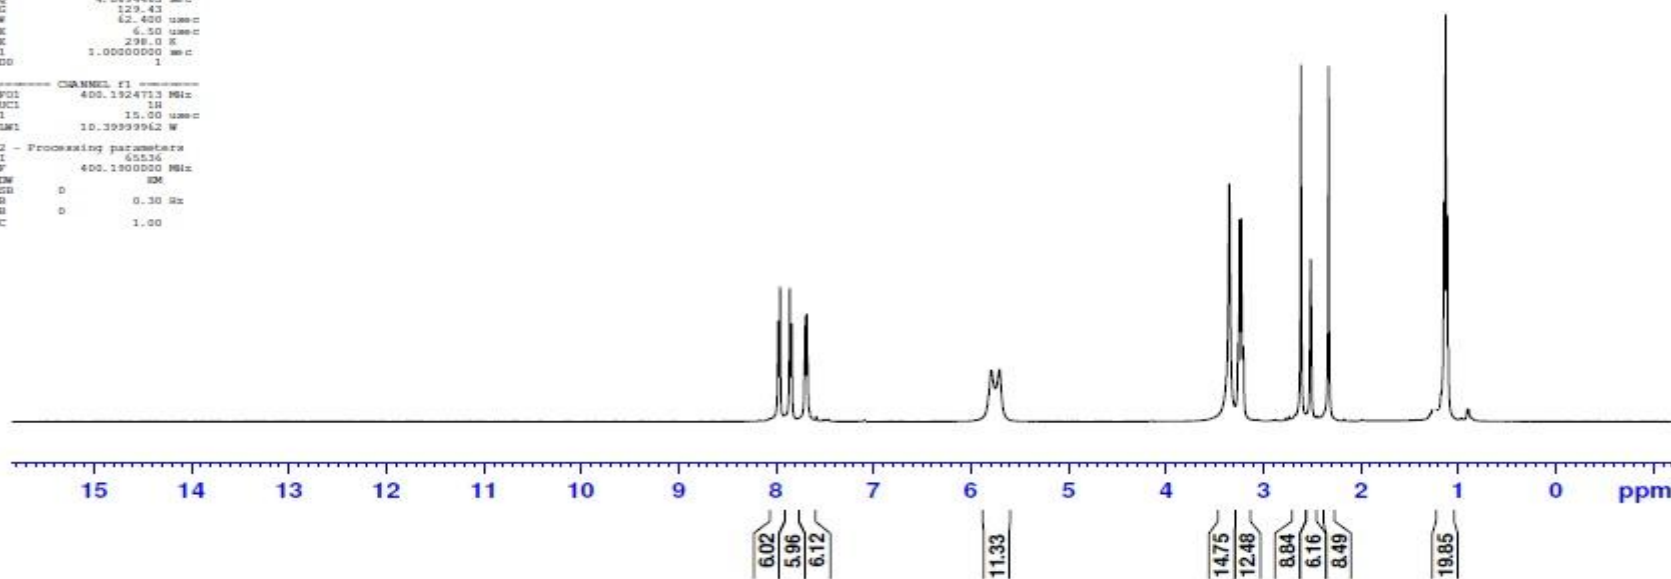

Mariam Mohamed\_H\_MF0-1-Ag

Microanalytical Unit - FOPCU - NMR laboratory  
www.pharma.cu.edu.eg dir-mau.fopcu@pharma.cu.edu.eg

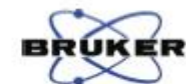

Current Data Parameters  
NAME: Mariem Mohamed\_H\_MF0-1-Ag  
EXPNO: 10  
PROCNO: 1

F2 - Acquisition Parameters  
Date\_: 20220606  
Time: 21.54  
INSTRUM: spect  
PROBHD: 5 mm VARIO 500  
PULPROG: zgpg30  
TD: 65536  
SOLVENT: DMSO  
NS: 32  
DS: 2  
SWH: 8012.820 Hz  
FIDRES: 0.122266 Hz  
AQ: 4.0894465 sec  
RG: 129.43  
DM: 42.400 usec  
DE: 6.50 usec  
TE: 298.0 K  
SI: 1.00000000 sec  
TSD: 1

===== CHANNEL f1 =====  
NUC1: 400.1324713 MHz  
P1: 18.00 usec  
P2: 10.39999962 W  
F2 - Processing parameters  
SI: 65536  
SF: 400.1300000 MHz  
WDW: EM  
SSB: 0  
LB: 0.30 Hz  
GB: 0  
PC: 1.00

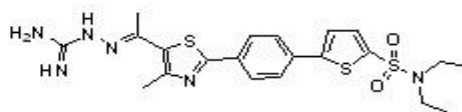

7.9734  
7.9527  
7.8550  
7.8344  
7.7035  
7.6942  
7.6791  
7.6697  
5.7875  
5.7017  
3.3447  
3.2530  
3.2355  
3.2178  
3.2004  
2.6070  
2.5087  
2.3245  
1.1394  
1.1219  
1.1043

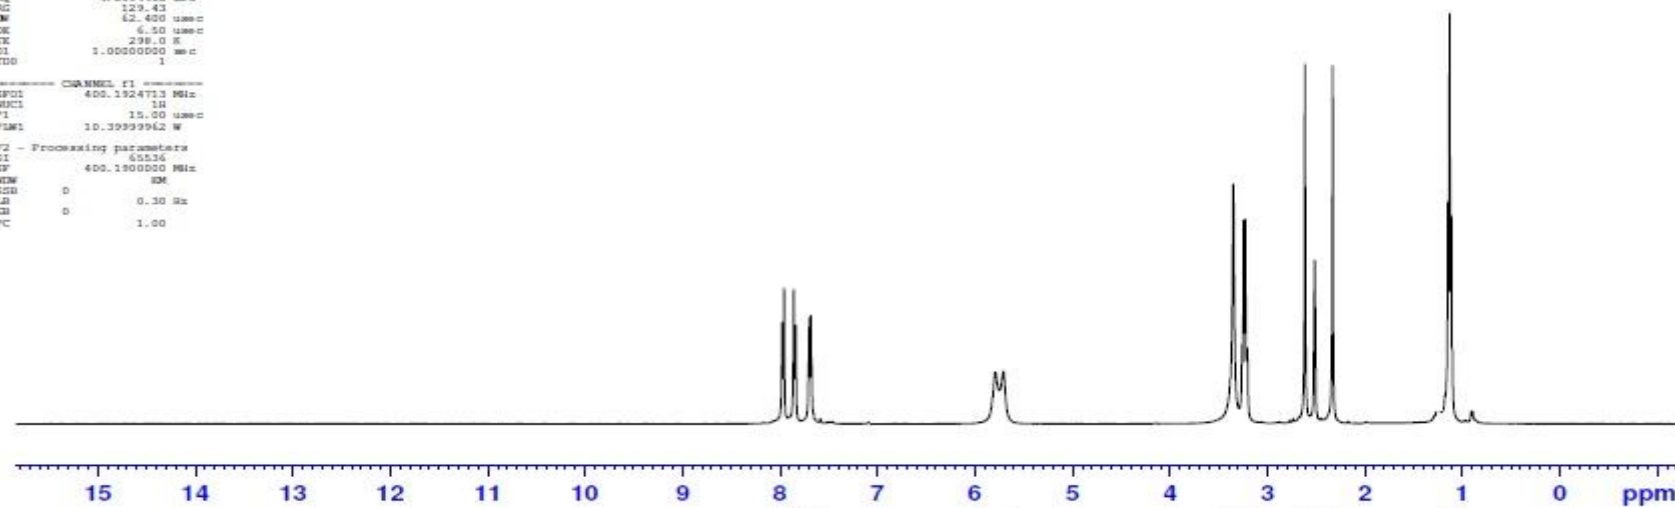

6.02  
5.96  
6.12  
11.33  
14.75  
12.48  
8.84  
6.16  
8.49  
19.85

## SAMPLE INFORMATION

|                   |              |                     |                                  |
|-------------------|--------------|---------------------|----------------------------------|
| Sample Name:      | BB 5-AG      | Acquired By:        | System                           |
| Sample Type:      | Unknown      | Sample Set Name:    | Mariam                           |
| Vial:             | 18           | Acq. Method Set:    | Trial 1                          |
| Injection #:      | 1            | Processing Method:  | 1                                |
| Injection Volume: | 50.00 ul     | Channel Name:       | 300.0nm                          |
| Run Time:         | 30.0 Minutes | Proc. Chnl. Descr.: | W2996 PDA 300.0 nm (PDA 210.0 to |

Date Acquired: 11/24/2021 10:56:00 PM EET  
Date Processed: 11/25/2021 4:33:45 PM EET

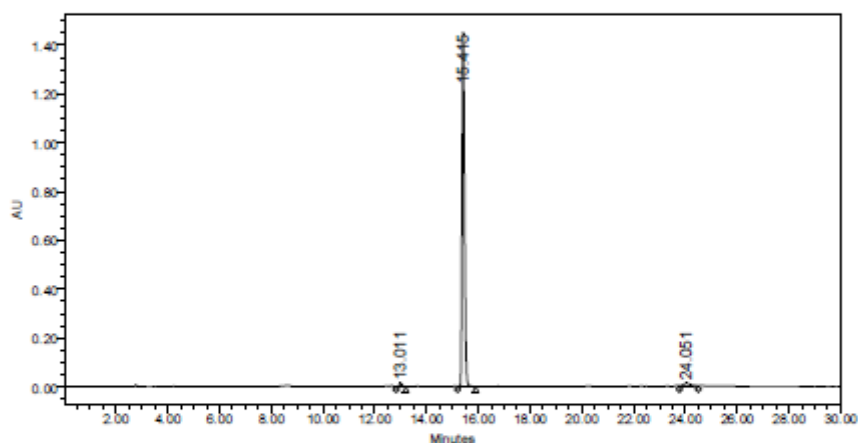

| RT       | Area    | % Area | Height  |
|----------|---------|--------|---------|
| 1 13.011 | 95801   | 0.97   | 13410   |
| 2 15.415 | 9489941 | 96.28  | 1447373 |
| 3 24.051 | 270833  | 2.75   | 12776   |

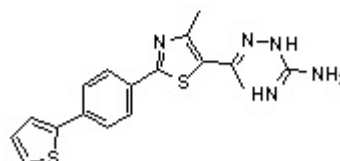

Reported by User: System  
Report Method: Default Individual Report  
Report Method ID: 1529  
Page: 1 of 2

Project Name: 4 Nas  
Date Printed: 11/25/2021  
7:51:25 PMAfrica/Cairo
